# Supplementary material
Source: PubMed Central journal article supplement (PMC1464347)

### Lepidoptera COII

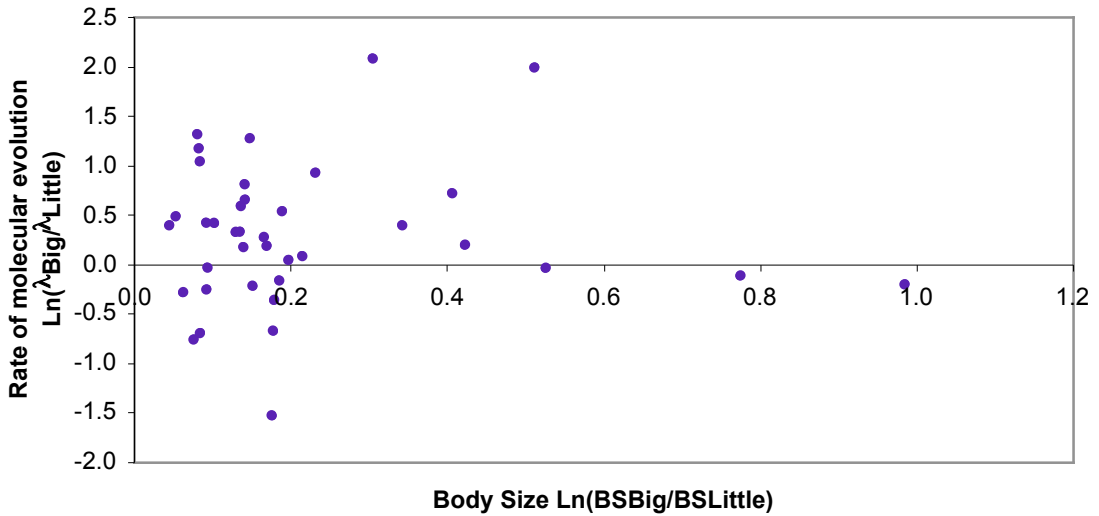

### Lepidoptera COII dN & dS

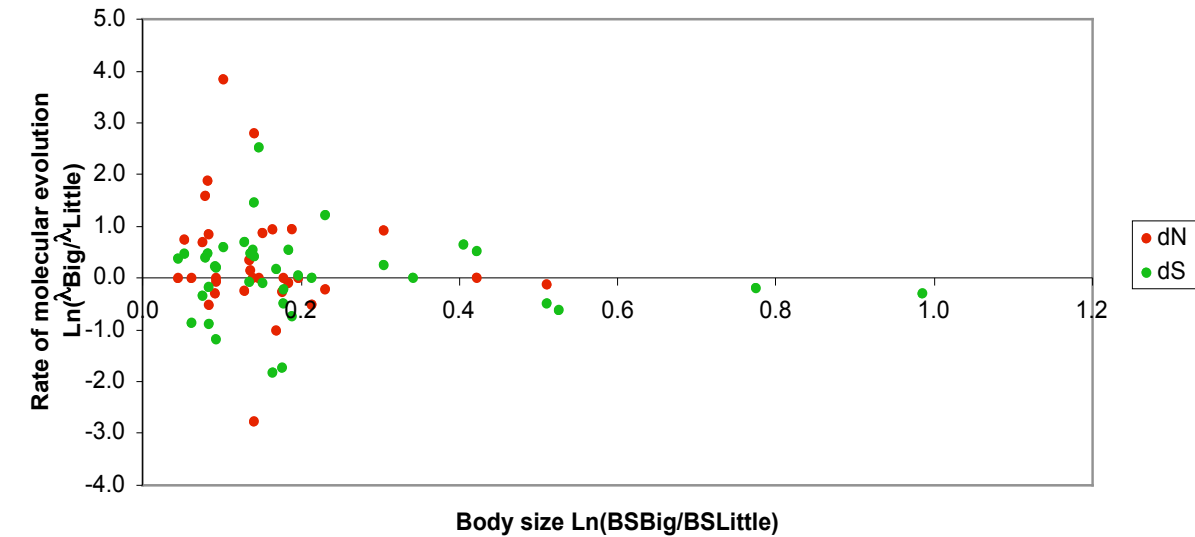

### Lepidoptera ND5

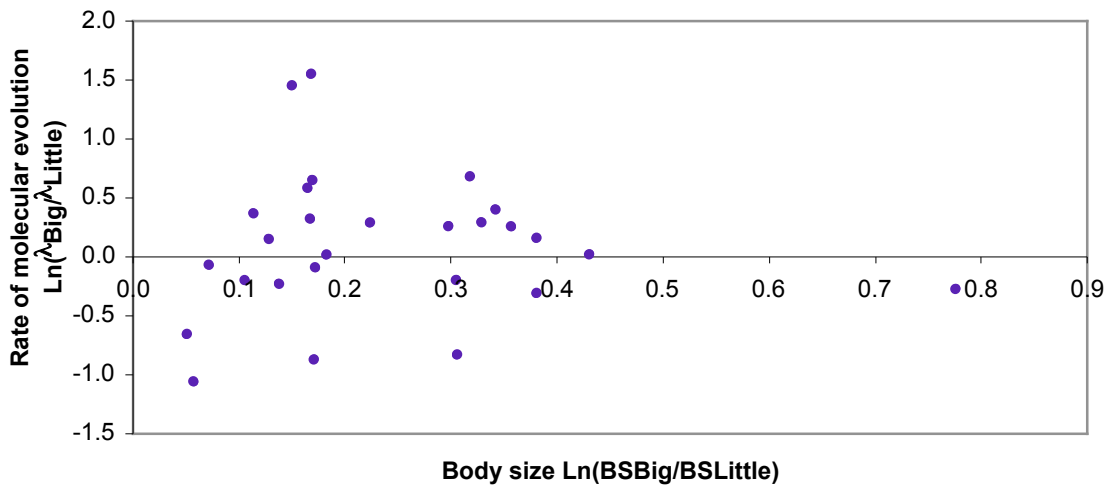

### Lepidoptera ND5 dN & dS

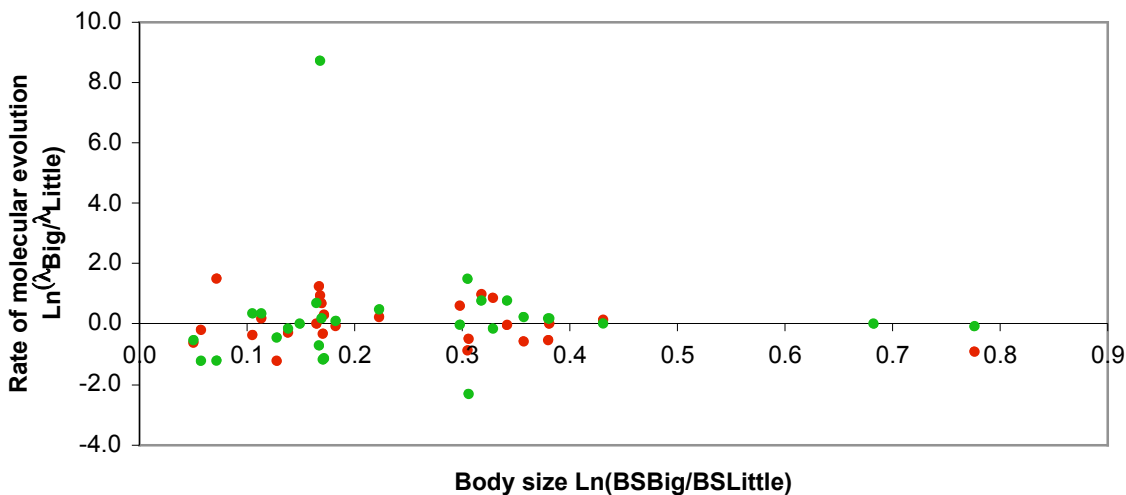

### Lepidoptera COI

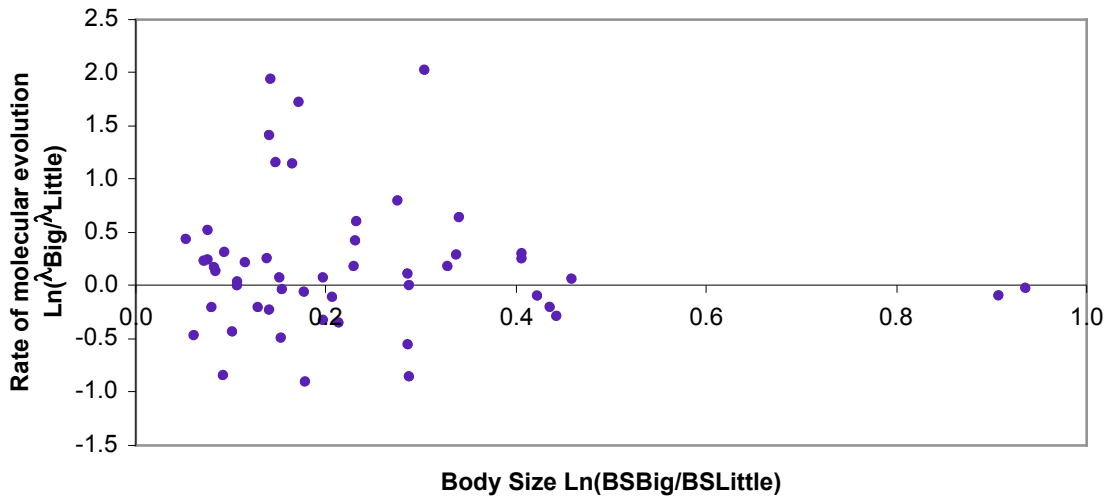

### Lepidoptera COI dN & dS

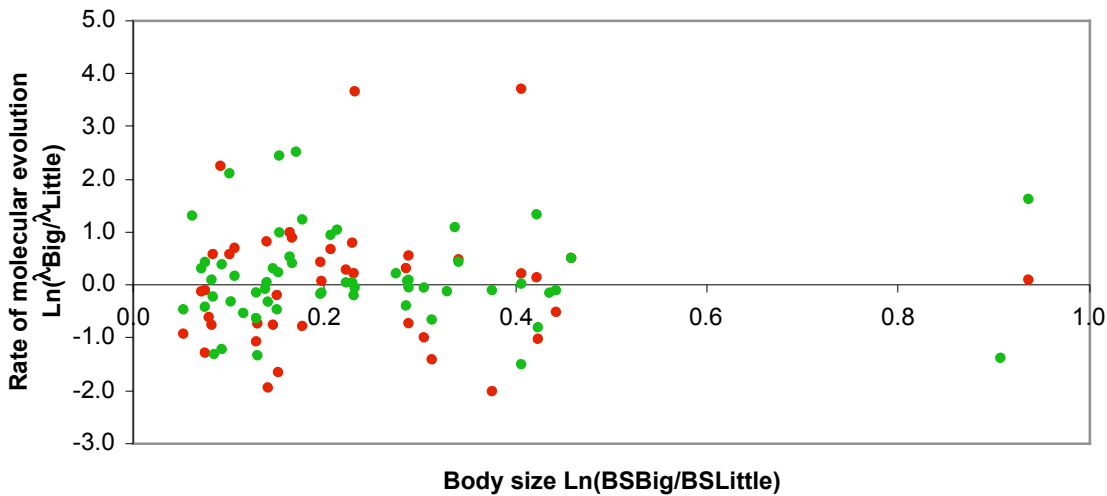

### Arachnida COI

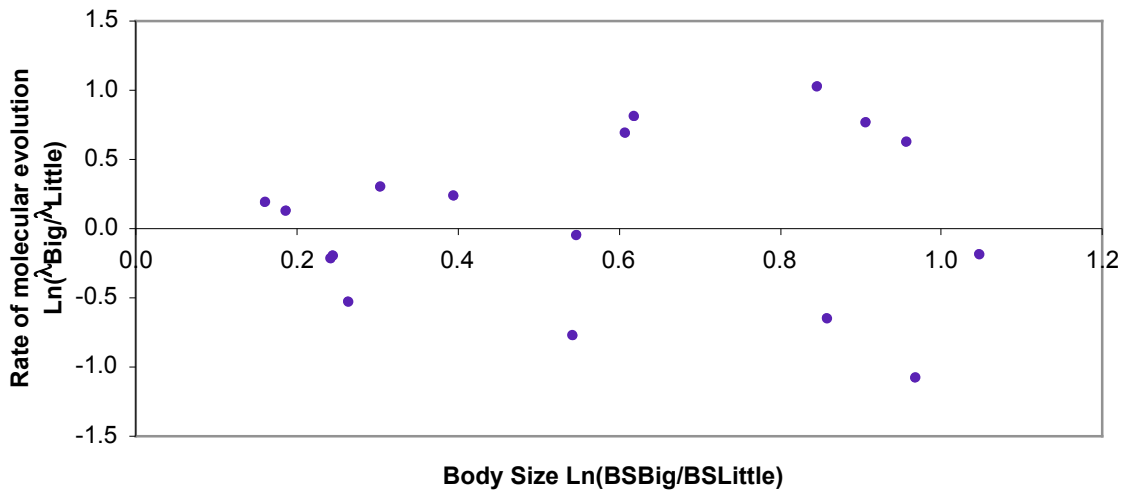

### Arachnida COI dN & dS

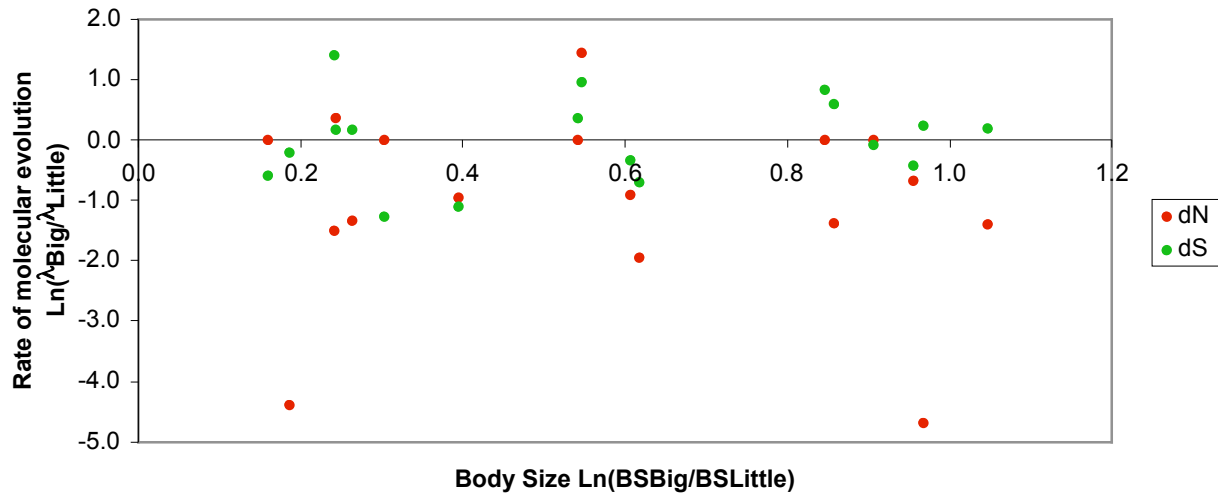

### Arachnida 16S

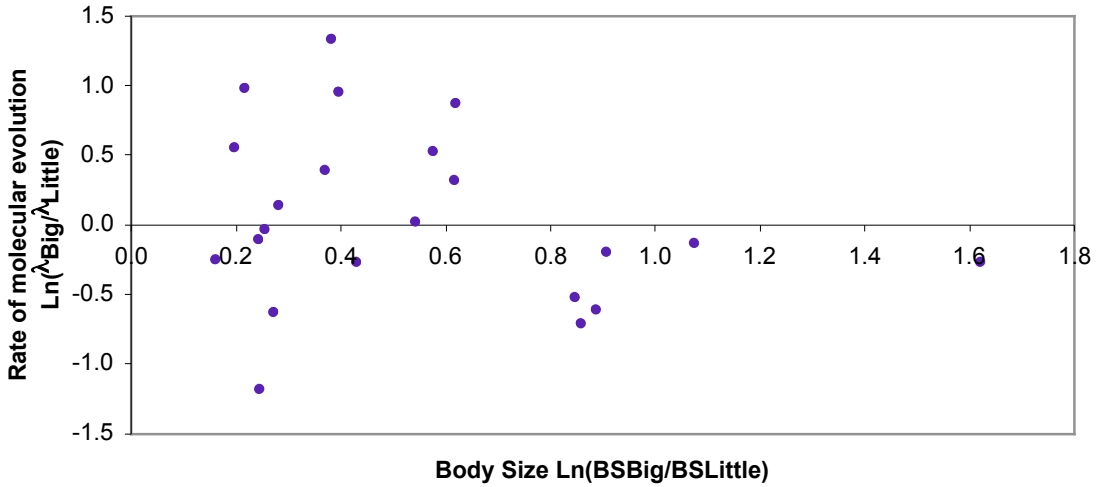

### Cephalopoda 16S

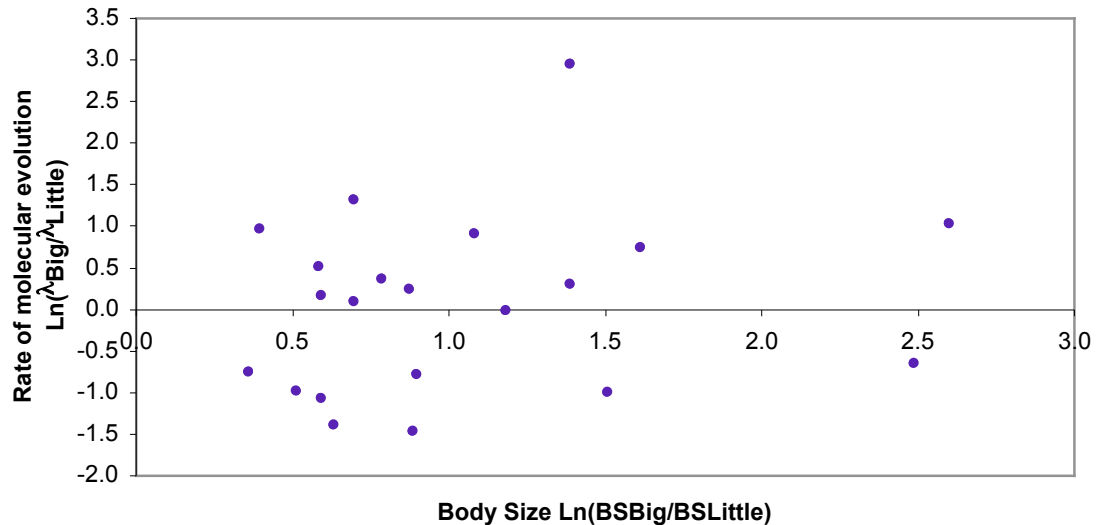

### Cephalopoda COI

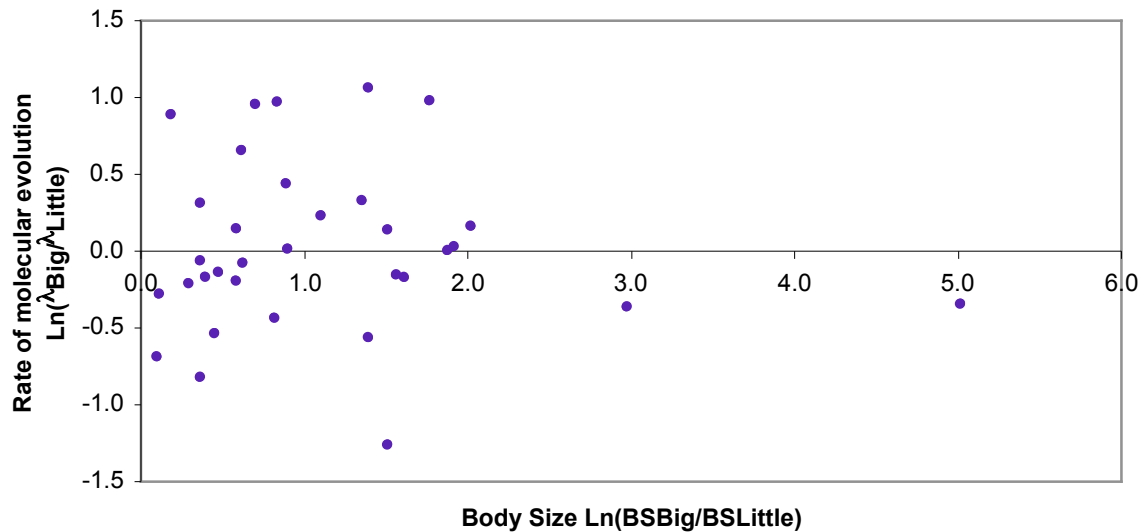

### Cephalopoda COI dN & dS

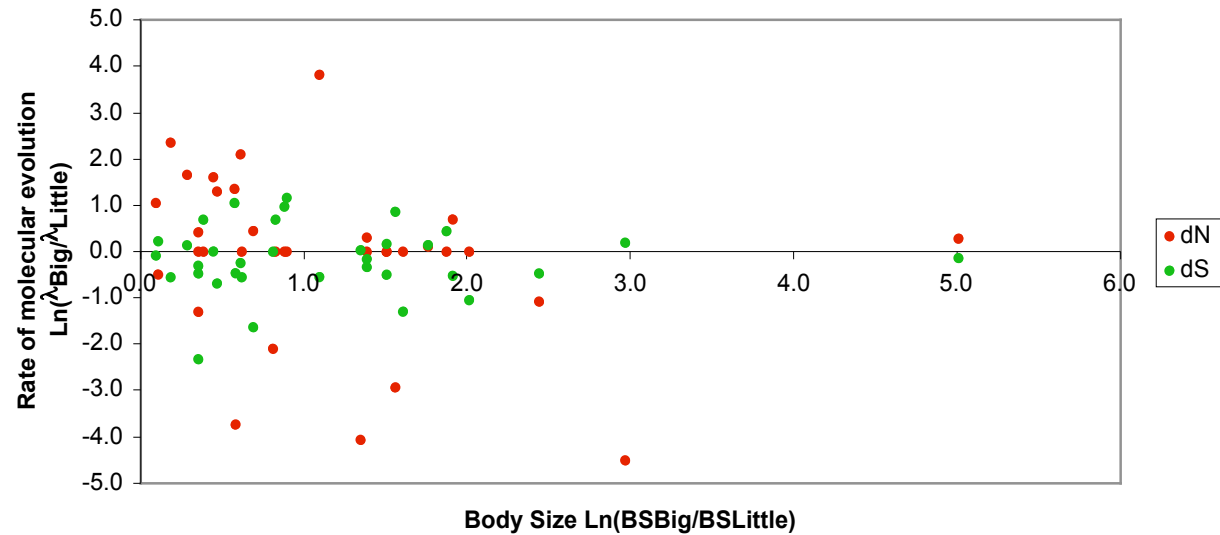

### Gastropoda COI

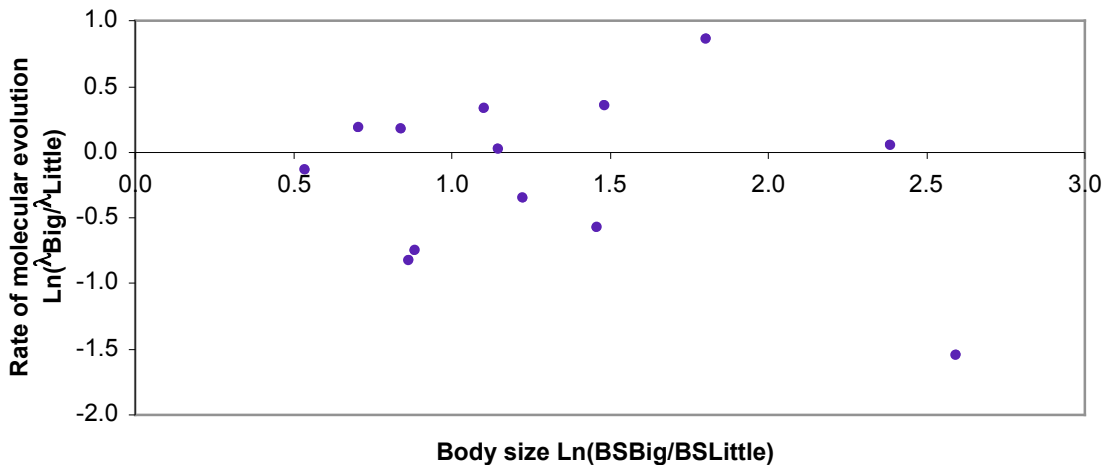

### Gastropoda COI dN & dS

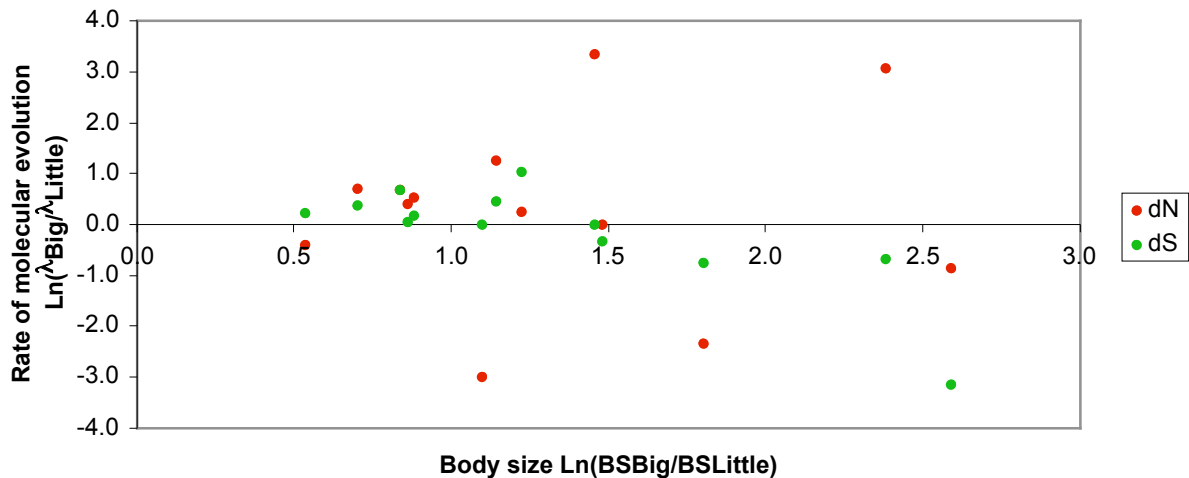

### Gastropoda 28S

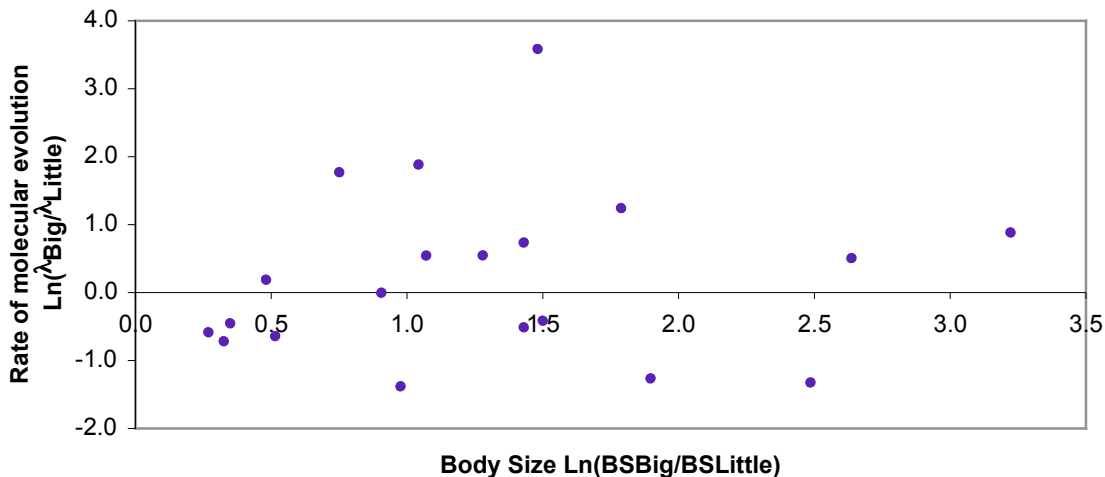

### Platyhelminthes 18S

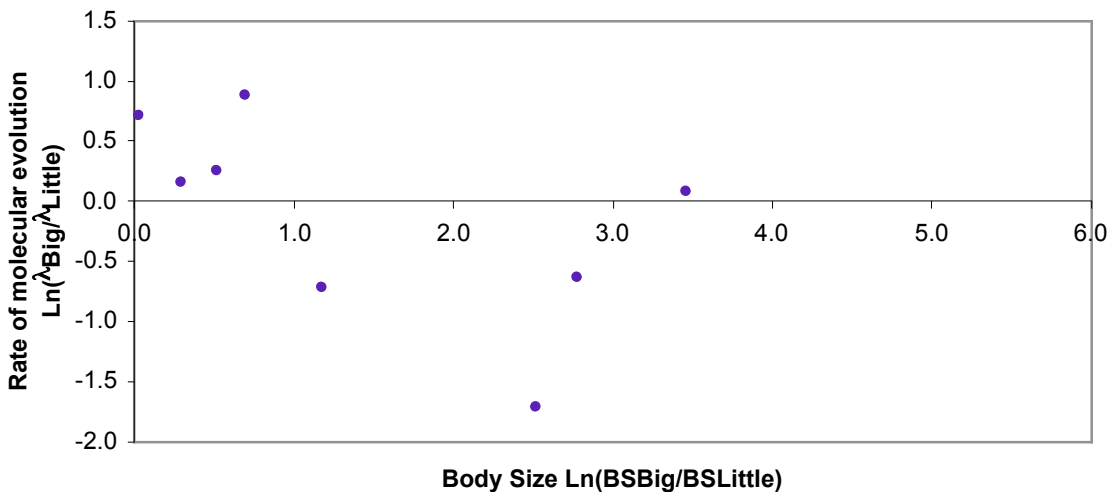



### Platyhelminthes COI

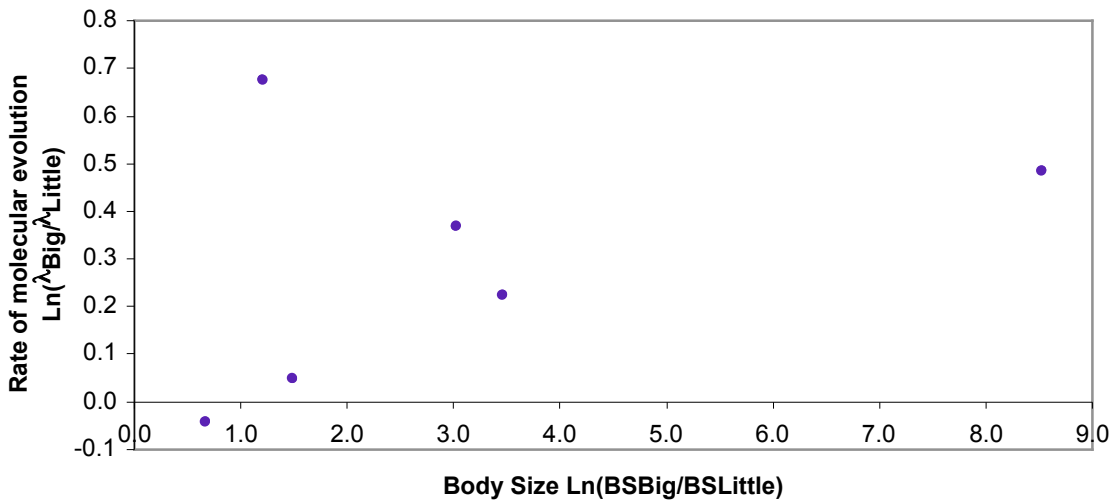

### Platyhelminthes COI dN & dS

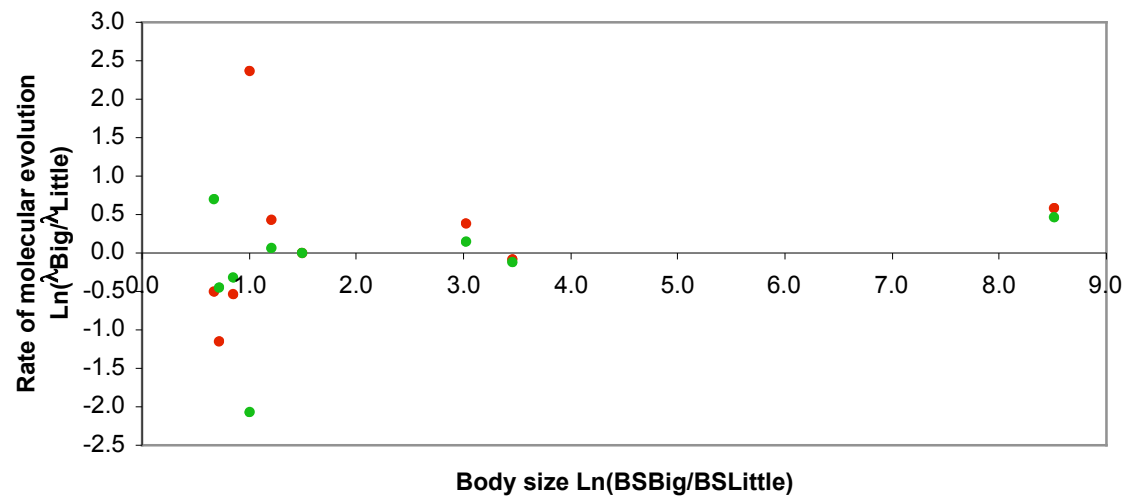

### Echinodermata 18S

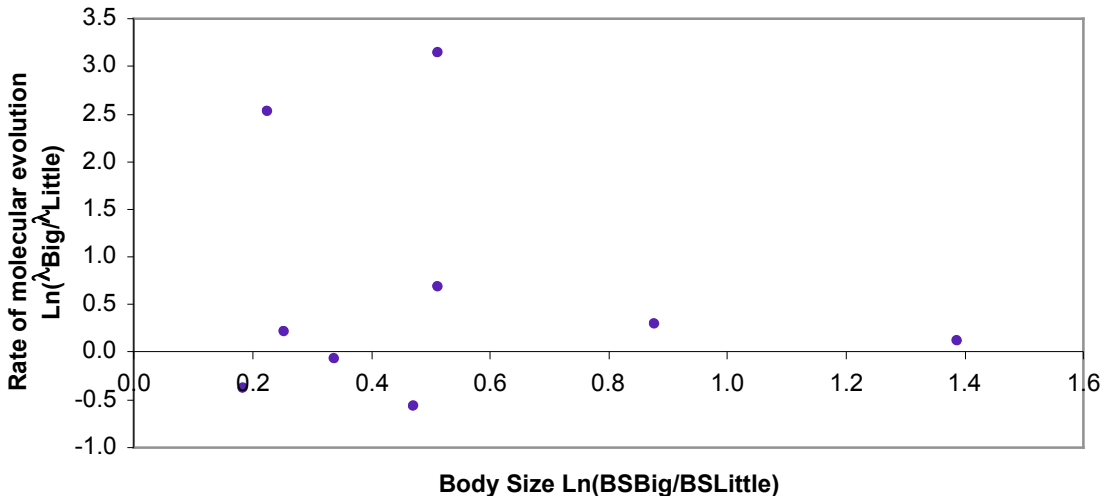

### Echinodermata 28S

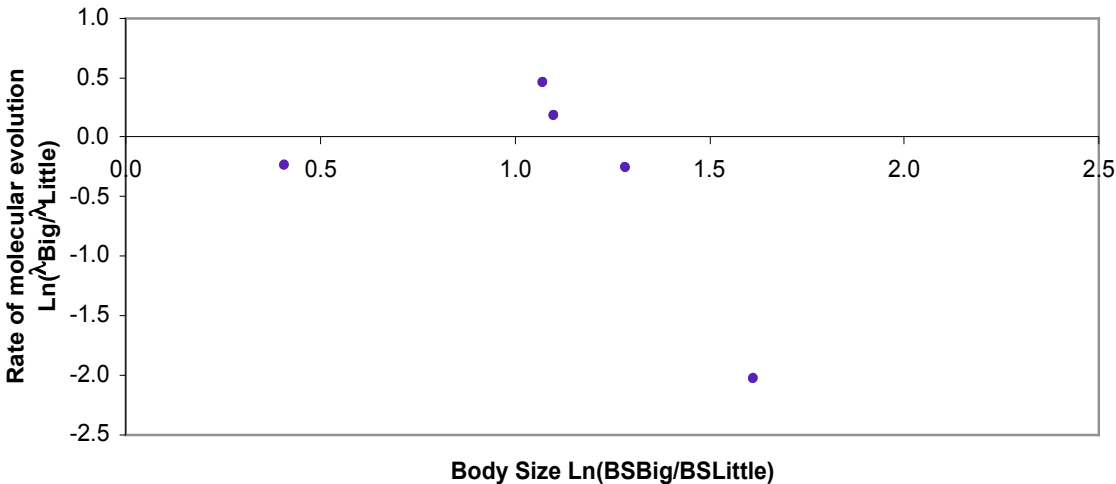

### Hymenoptera COI

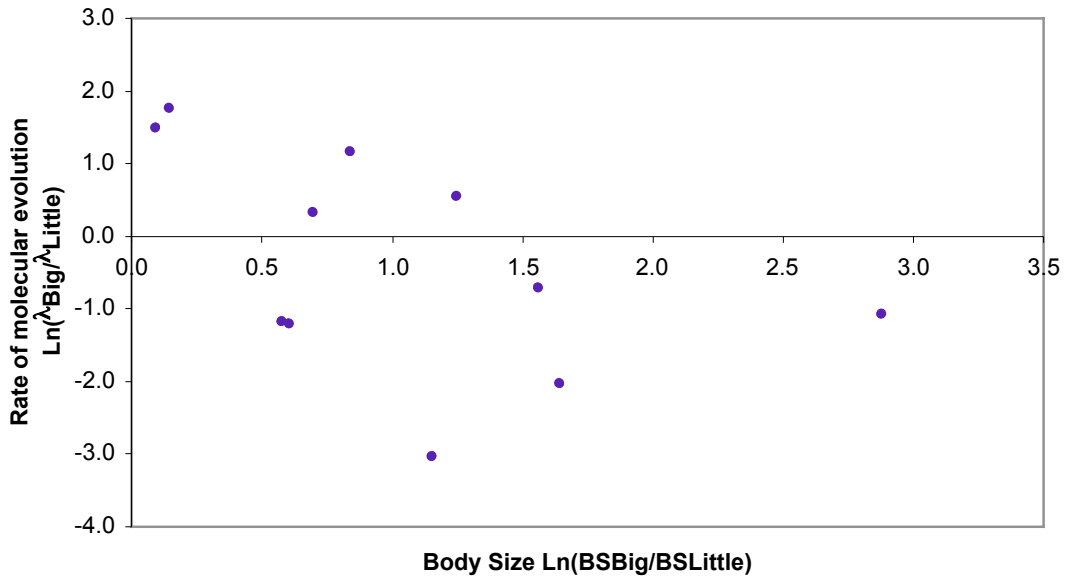

### Hymenoptera COI dN & dS

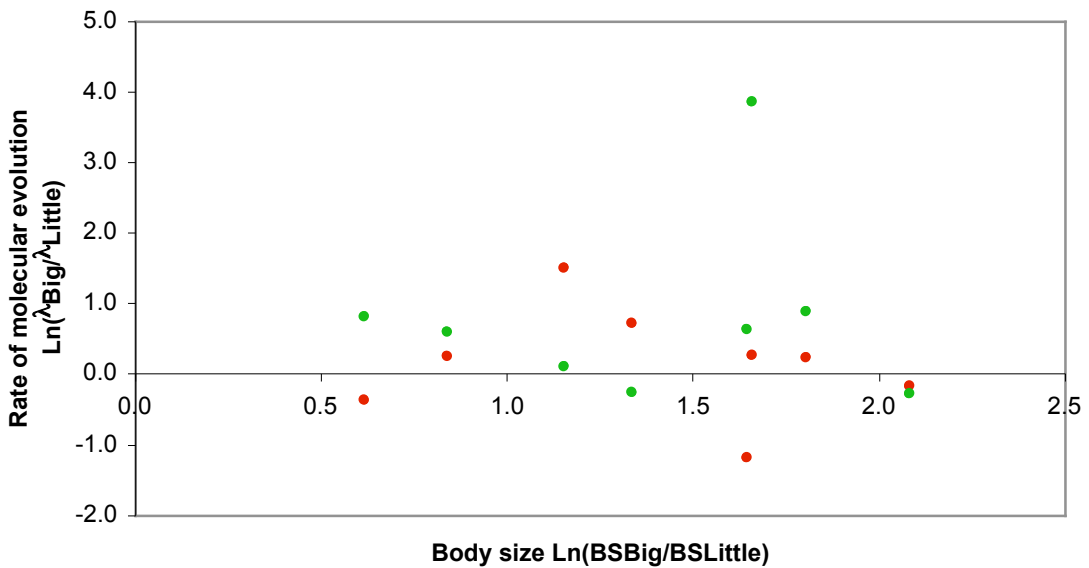

### Hymenoptera 28S

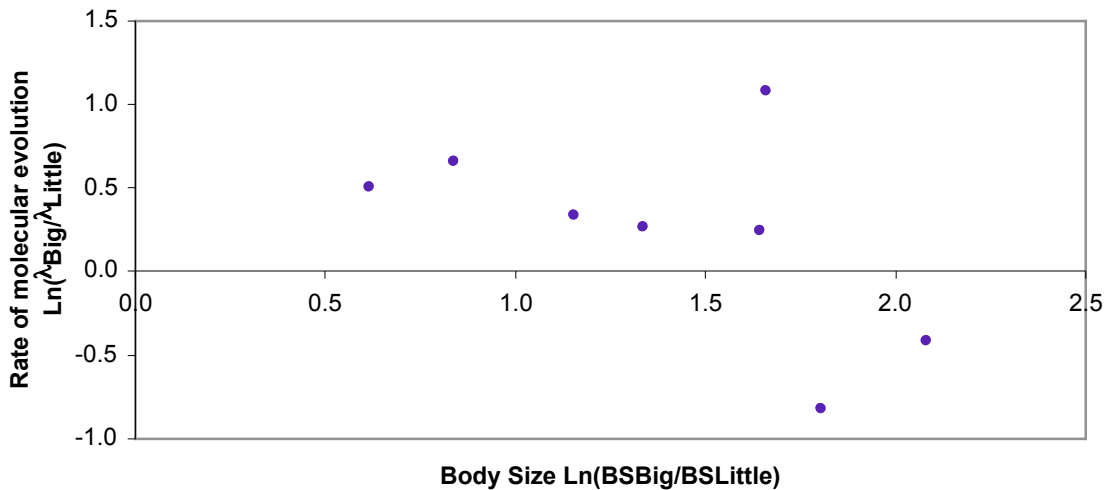

### Annelida 18S

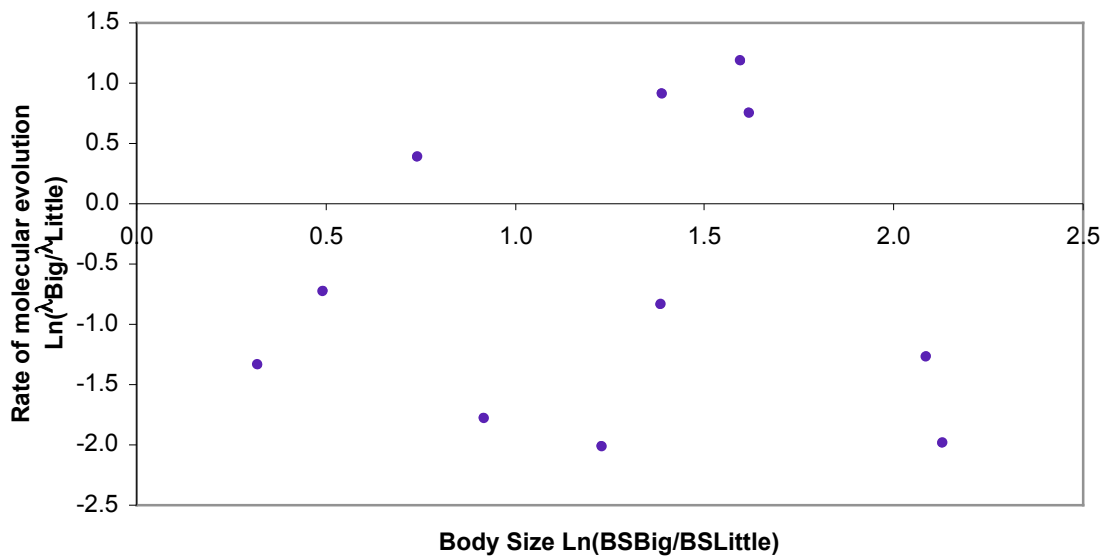

### Annelida H3

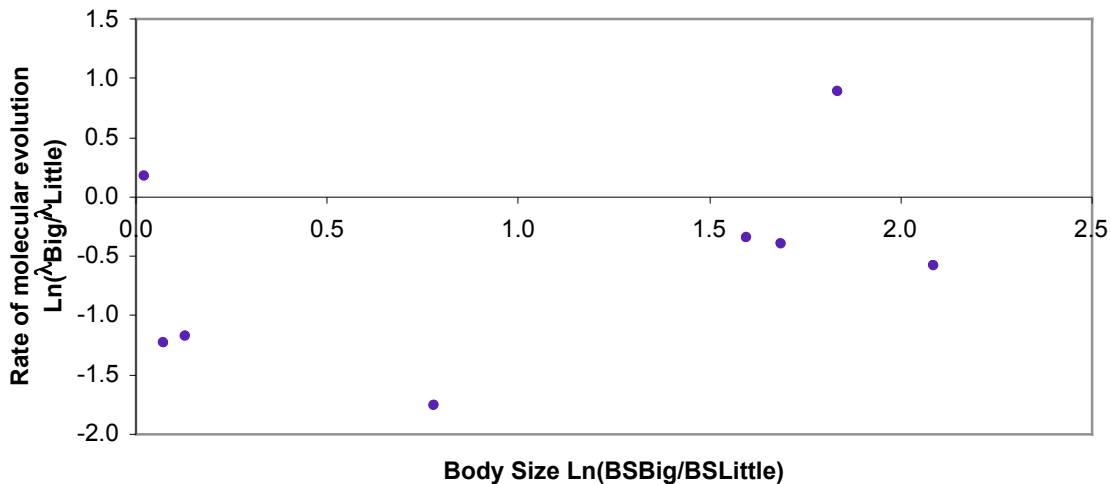

### Annelida H3 dN & dS

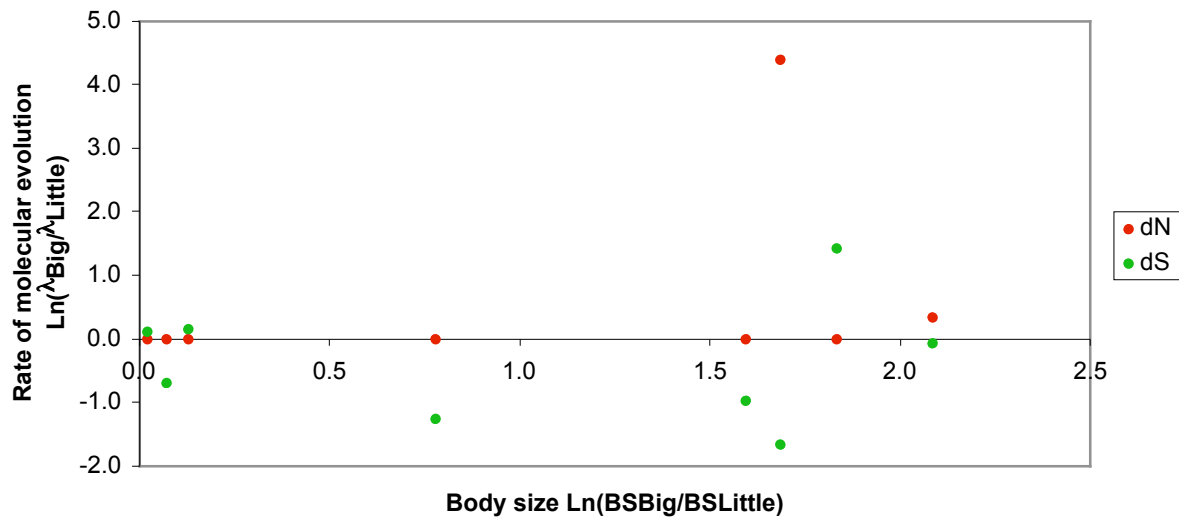

### Bivalvia 18S

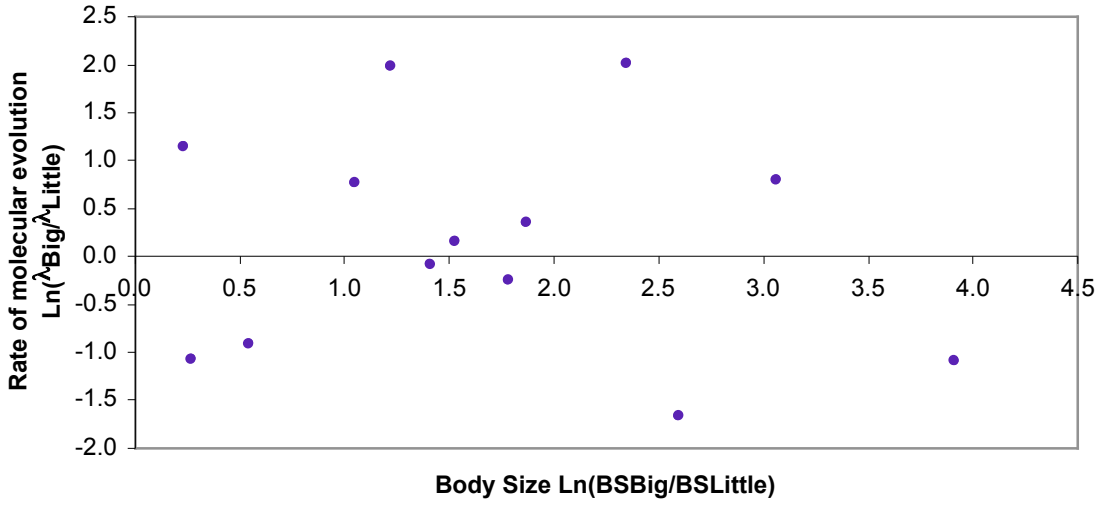

### Bivalvia 28S

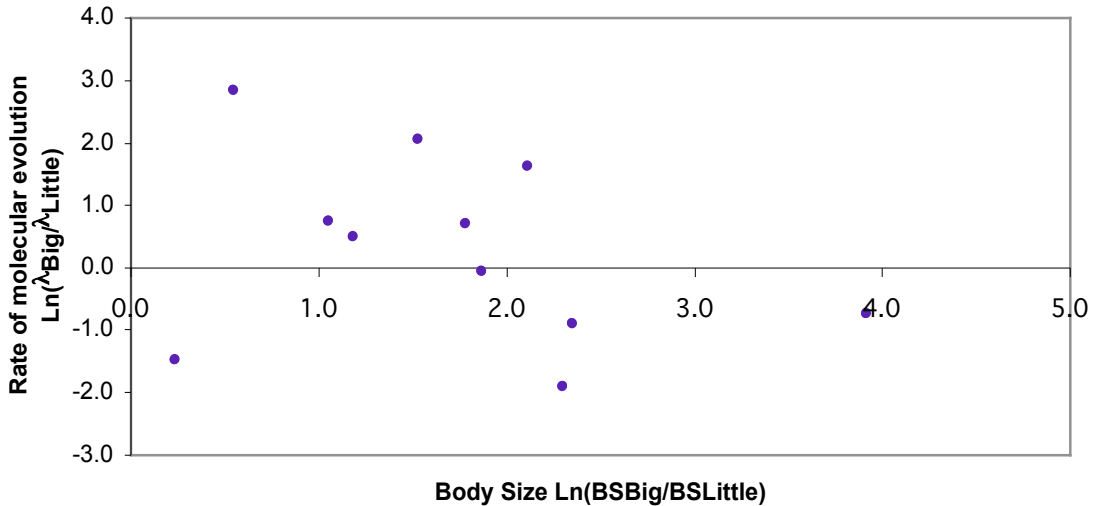

### Bivalvia COI

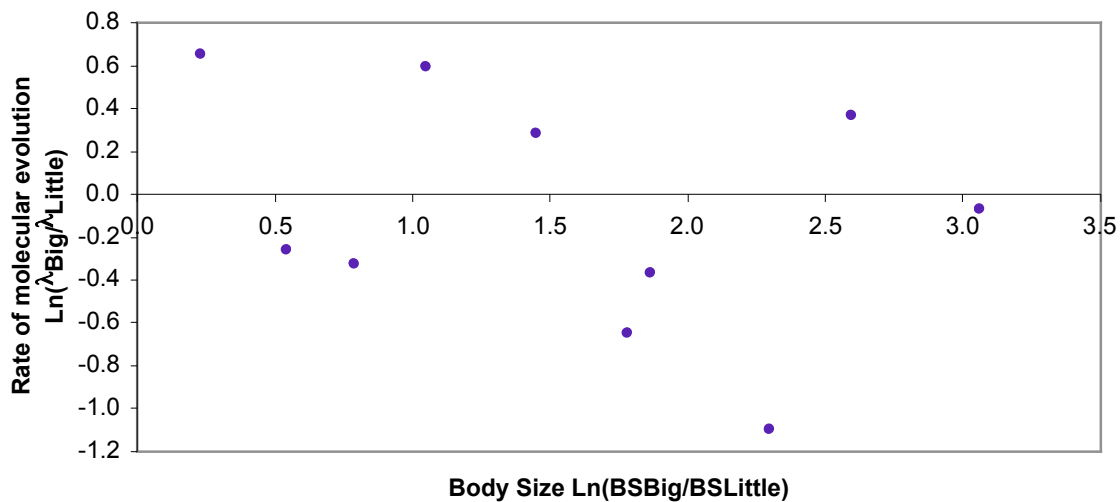

### Bivalvia COI dN & dS

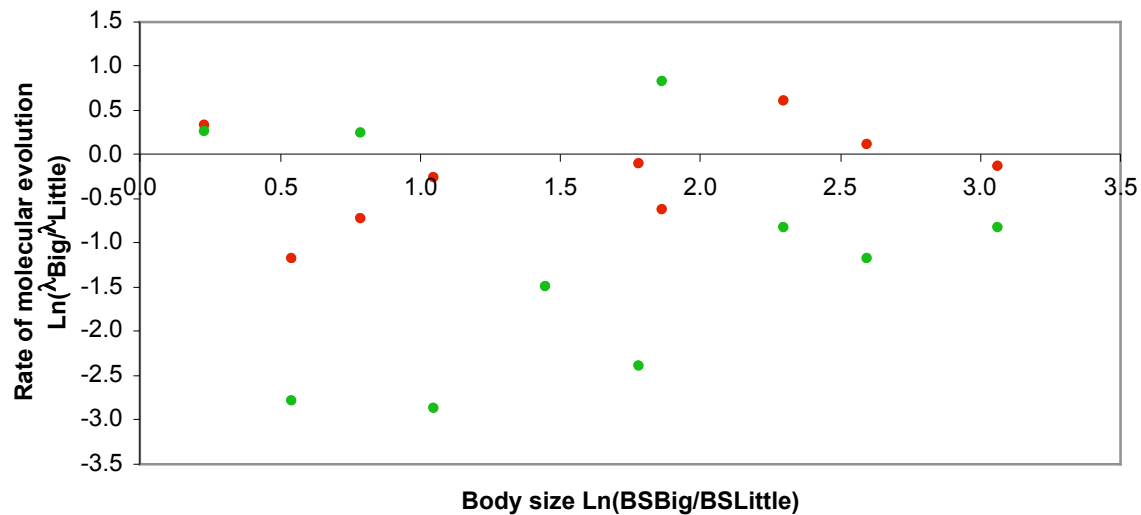

### Monogenea 18S

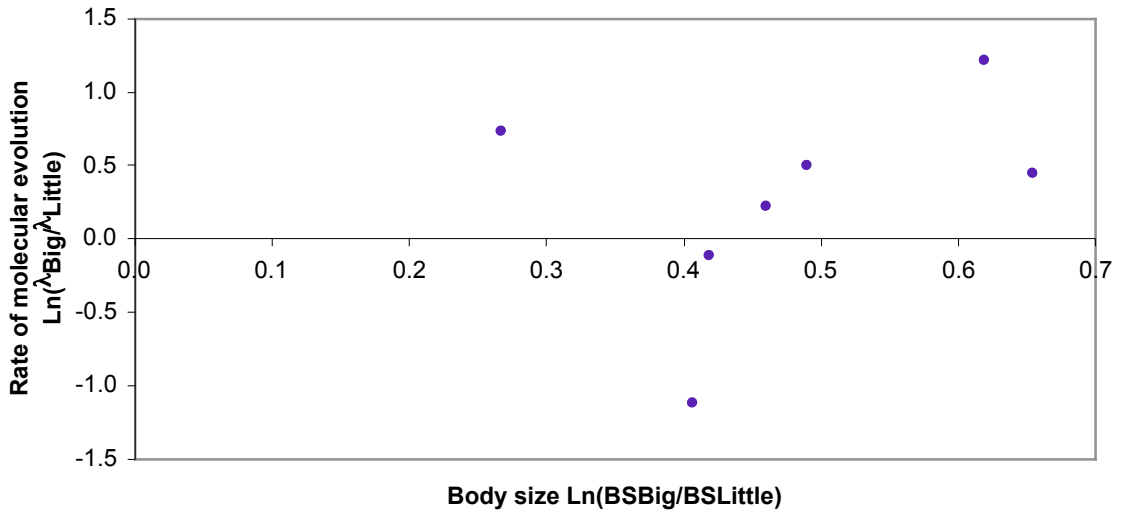

### Monogenea 28S

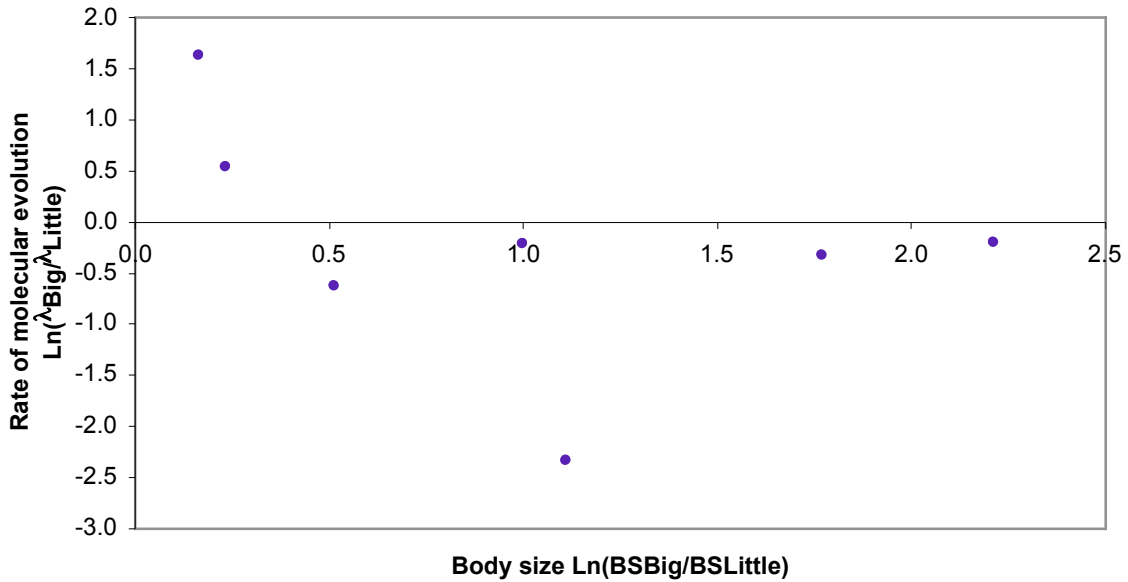

Supplement: pnas_0510251103_1.pdf [file pnas_0510251103_1.pdf]
