# Supplementary material
Source: PubMed Central journal article supplement (PMC1464347)
Supplement: pnas_0510251103_2.pdf [file pnas_0510251103_2.pdf]

**Appendix 1.** Results of the comparison of molecular clock (MC) and free-rate (FR) models of rate change for each data set. The values of the second-order Akaike information criterion test (AICc) are shown. The favoured model is indicated, and a significant difference between the two models (taken to be  $\Delta AICc > 10$ ) is shown with an asterisk.

| Data set                  | Gene | Sequence length, bp | No. species in tree | ln likelihood FR model | ln likelihood MC model | AICc FR model | AICc MC model | $\Delta$ AICc | Supported model |
|---------------------------|------|---------------------|---------------------|------------------------|------------------------|---------------|---------------|---------------|-----------------|
| Species-level comparisons |      |                     |                     |                        |                        |               |               |               |                 |
| Lepidoptera               | COI  | 1470                | 148                 | 32028.66               | 32391.43               | 64805.50      | 65122.17      | 316.68        | FR *            |
|                           | COII | 740                 | 100                 | 13303.57               | 13429.42               | 27163.85      | 27101.24      | 62.61         | FR *            |
|                           | ND5  | 783                 | 69                  | 11414.47               | 11498.35               | 23170.44      | 23157.93      | 12.52         | MC *            |
| Arachnida                 | 16S  | 944                 | 76                  | 11309.09               | 11400.75               | 22986.69      | 22976.52      | 10.17         | MC *            |
|                           | COI  | 471                 | 52                  | 8456.71                | 8454.54                | 17187.73      | 17036.49      | 151.24        | MC *            |
| Cephalopoda               | COI  | 684                 | 105                 | 22616.36               | 22759.56               | 45848.46      | 45778.90      | 69.56         | MC *            |
|                           | 16S  | 457                 | 94                  | 5366.75                | 5505.20                | 11386.36      | 11260.59      | 125.77        | MC *            |
| Gastropoda                | 28S  | 1556                | 72                  | 10585.75               | 10781.63               | 21493.96      | 21723.17      | 229.22        | FR *            |
|                           | COI  | 1209                | 44                  | 15136.95               | 15256.41               | 30468.55      | 30612.88      | 144.34        | FR *            |
| Echinodermata             | 18S  | 1721                | 24                  | 6125.68                | 6184.26                | 12354.41      | 12425.48      | 71.07         | FR *            |
|                           | 28S  | 332                 | 29                  | 1615.64                | 1621.58                | 3378.30       | 3316.70       | 61.60         | MC *            |
| Platyhelminthes           | 18S  | 1709                | 28                  | 8465.51                | 8532.63                | 17051.18      | 17130.51      | 79.33         | FR *            |
|                           | COI  | 810                 | 25                  | 7106.10                | 7147.53                | 14323.48      | 14355.28      | 31.80         | FR *            |
| Family-level comparisons  |      |                     |                     |                        |                        |               |               |               |                 |
| Hymenoptera               | 28S  | 591                 | 41                  | 4242.88                | 4332.33                | 8681.98       | 8762.26       | 80.28         | FR *            |
|                           | COI  | 421                 | 27                  | 5134.23                | 5166.61                | 10398.00      | 10400.32      | 2.32          | FR              |
| Bivalvia                  | 18S  | 1819                | 33                  | 12349.78               | 12615.53               | 24840.91      | 25306.63      | 465.72        | FR *            |
|                           | 28S  | 3509                | 35                  | 15213.25               | 15440.33               | 30573.55      | 30959.56      | 386.01        | FR *            |
|                           | COI  | 1074                | 36                  | 18732.27               | 18804.89               | 37623.66      | 37692.96      | 69.30         | FR *            |
| Annelida                  | 18S  | 1624                | 57                  | 19796.72               | 20209.29               | 39843.45      | 40545.43      | 701.98        | FR *            |
|                           | H3   | 1270                | 40                  | 11672.05               | 11817.99               | 23519.56      | 23727.22      | 207.66        | FR *            |
| Monogenea                 | 18S  | 1898                | 20                  | 9765.94                | 9817.16                | 19617.84      | 19682.96      | 65.12         | FR *            |
|                           | 28S  | 930                 | 22                  | 7128.10                | 7186.23                | 14353.10      | 14426.02      | 72.92         | FR *            |
