# Supplementary material
Source: PubMed Central journal article supplement (PMC1464347)
Supplement: pnas_0510251103_3.pdf [file pnas_0510251103_3.pdf]

**Appendix 2.** Results for statistical tests analysing the relationship between body size and substitution rate for nonsynonymous (dN) and synonymous (dS) substitutions for the protein coding genes. The “no. of +ve signs” indicate the number of comparisons in which the bigger species had a faster rate of molecular evolution than the smaller species, out of the total “no. of pairs” for the data set. Significant results are shown with an asterisk. Bonferroni’s corrected values are indicated in parentheses. Dashes indicate that a large number of zero-length branches precluded use of the test.

| Data set                  | Gene | No. of pairs | No. of +ve signs |    | Sign test <i>P</i> value |       | Signed rank test <i>P</i> value |                   | Spearman’s rank |        | Spearman <i>P</i> value |                   |
|---------------------------|------|--------------|------------------|----|--------------------------|-------|---------------------------------|-------------------|-----------------|--------|-------------------------|-------------------|
|                           |      |              | dN               | dS | dN                       | dS    | dN                              | dS                | dN              | dS     | dN                      | dS                |
| Species-level comparisons |      |              |                  |    |                          |       |                                 |                   |                 |        |                         |                   |
| Lepidoptera               | COI  | 63           | 29               | 31 | 0.684                    | 1.000 | 0.877                           | 0.701             | 0.080           | 0.039  | 0.618                   | 0.774             |
|                           | COII | 38           | 19               | 22 | 0.487                    | 0.418 | 0.056                           | 0.350             | -0.343          | -0.075 | 0.075                   | 0.652             |
|                           | ND5  | 28           | 11               | 15 | 0.839                    | 0.851 | 0.786                           | 0.891             | -0.124          | 0.251  | 0.561                   | 0.215             |
| Arachnida                 | COI  | 17           | 3                | 9  | 0.035*<br>(0.352)        | 1.000 | 0.083                           | 0.554             | -0.084          | 0.164  | 0.800                   | 0.528             |
| Cephalopoda               | COI  | 34           | 19               | 14 | 0.201                    | 0.392 | 0.382                           | 0.039*<br>(0.394) | -0.420          | 0.021  | 0.052                   | 0.905             |
| Gastropoda                | COI  | 14           | 8                | 8  | 0.581                    | 0.581 | 0.424                           | 0.946             | -0.007          | -0.646 | 0.991                   | 0.037*<br>(0.370) |
| Platyhelminthes           | COI  | 10           | 5                | 5  | 1.000                    | 1.000 | 0.910                           | 0.910             | 0.595           | 0.191  | 0.132                   | 0.665             |
| Family-level comparisons  |      |              |                  |    |                          |       |                                 |                   |                 |        |                         |                   |
| Hymenoptera               | COI  | 8            | 5                | 6  | 0.727                    | 0.289 | 0.484                           | 0.109             | -0.119          | -0.024 | 0.793                   | 0.977             |
| Bivalvia                  | COI  | 10           | 3                | 3  | 0.344                    | 0.344 | 0.557                           | 0.106             | 0.317           | 0.115  | 0.410                   | 0.759             |
| Annelida                  | H3   | 8            | 6                | 3  | 0.289                    | 0.727 | 0.063                           | 0.547             | -               | -0.048 | -                       | 0.935             |
