# Supplementary material
Source: PubMed Central journal article supplement (PMC1464347)
Supplement: pnas_0510251103_4.pdf [file pnas_0510251103_4.pdf]

**Appendix 3.** Results for the metaanalyses (all comparisons and within-phylum comparisons). The “no. of +ve signs” indicate the number of comparisons in which the bigger species had a faster rate of molecular evolution than the smaller species, out of the total “no. of pairs” for the data set.

| Taxonomic group | No. of data sets | No. of pairs | No. of +ve signs | Sign test <i>P</i> value | Signed rank test <i>P</i> value |
|-----------------|------------------|--------------|------------------|--------------------------|---------------------------------|
| All Phyla       | 10               | 207          | 102              | 0.890                    | 0.761                           |
| Arthropoda      | 3                | 96           | 47               | 0.919                    | 0.832                           |
| Mollusca        | 3                | 70           | 36               | 0.905                    | 0.363                           |
| Platyhelminthes | 2                | 18           | 10               | 0.815                    | 0.811                           |
