# Supplementary material
Source: PubMed Central journal article supplement (PMC1464347)
Supplement: pnas_0510251103_5.pdf [file pnas_0510251103_5.pdf]

**Appendix 4.** Absolute sizes (in millimeter), size difference in ratios and branch lengths (BL) for David and Goliath comparison pairs. Log likelihoods are given for the local clock (LC) and free-rate (FR) models of sequence evolution and data sets with significant rate variation are indicated with an asterisk. Genes were chosen to generate the greatest order of magnitude in size difference between species. References in parentheses indicate sources of body size data. Size ratios were calculated from appropriate compound measurements where dimensions were given and from geometric means where ranges were given.

| Data set                         | Gene | Goliath (big) species              | Size, mm  | David (little) species              | Size, mm      | Size ratio | Outgroup                      | LC      | FR       | Big BL  | Little BL |
|----------------------------------|------|------------------------------------|-----------|-------------------------------------|---------------|------------|-------------------------------|---------|----------|---------|-----------|
| <b>Species level comparisons</b> |      |                                    |           |                                     |               |            |                               |         |          |         |           |
| Lepidoptera                      | ND5  | <i>Troides hypolitus</i> (1)       | 875       | <i>Artopoetes pryeri</i> (1)        | 253           | 3          | <i>Zerynthia rumina</i>       | -1474.0 | -1467.1* | 0.24055 | 0.11692   |
|                                  |      | <i>Idea leuconoe</i> (1)           | 610       | <i>Zizina otis</i> (1)              | 105           | 6          | <i>Limenitis populi</i>       | -1240.4 | -1237.2* | 0.24358 | 0.13756   |
| Arachnida                        | 16S  | <i>Dysdera insulana</i> (2)        | 253.4     | <i>Dysdera esquiveli</i> (3)        | 48.4          | 5          | <i>Harpactea hombergii</i>    | -830.4  | -830.2   | 0.04130 | 0.05421   |
|                                  |      | <i>Tegenaria saeva</i> (4)         | 132.7     | <i>Neon nelli</i> (5)               | 26.3          | 5          | <i>Lepthyphantes minutus</i>  | -1525.5 | -1525.2  | 0.24451 | 0.33018   |
| Cephalopoda                      | 16S  | <i>Loligo forbesi</i> (6)          | 900       | <i>Octopus wolffi</i> (6)           | 15            | 60         | <i>Eledone massyae</i>        | -871.3  | -870.8   | 0.18087 | 0.04552   |
|                                  |      | <i>Architeuthis sp.</i> (6)        | 6000      | <i>Nototodarus hawaiiensis</i> (6)  | 16            | 375        | <i>Ctenopteryx sicula</i>     | -693.3  | -692.6   | 0.04353 | 0.05451   |
| Gastropoda                       | 28S  | <i>Buccinum undatum</i> (7)        | 110*68    | <i>Carychium tridentatum</i> (8)    | 1.8-2*0.8-0.9 | 962        | <i>Limax maximus</i>          | -1301.3 | -1279.7* | 0.86709 | 0.04615   |
|                                  |      | <i>Aplysia punctata</i> (7)        | <300      | <i>Acteon tornatilis</i> (7)        | <25           | 12         | <i>Lymnaea stagnalis</i>      | -1916.8 | -1908.9* | 0.07176 | 0.28169   |
| Echinodermata                    | 28S  | <i>Marthasterias glacialis</i> (9) | <700      | <i>Asterina gibbosa</i> (9)         | <50           | 12         | <i>Henricia sanguinolenta</i> | -503.2  | -503.2   | 0.00903 | 0.02828   |
| Platyhelminthes                  | 18S  | <i>Taenia solium</i> (10)          | 4500      | <i>Pseudodactylogyrus bini</i> (10) | 1.4           | 3214       | <i>Polycelis nigra</i>        | -3805.5 | -3798.3* | 0.08333 | 0.18782   |
| <b>Family level comparisons</b>  |      |                                    |           |                                     |               |            |                               |         |          |         |           |
| Hymenoptera                      | 28S  | Peleciniidae (11)                  | 42.4      | Mymaridae (11)                      | 0.6           | 71         | Dryinidae                     | -623.7  | -618.8*  | 0.05847 | 0.18877   |
| Bivalvia                         | 18S  | Pinnidae (12)                      | 240.4*111 | Terenidinidae (12)                  | 9*7.8         | 382        | Matricidae                    | -3471.7 | -3462.0* | 0.02019 | 0.10519   |
| Annelida                         | 18S  | Glyceridae (13)                    | 295       | Protodrilidae (13)                  | 7             | 42         | Chaetopteridae                | -3066.9 | -3042.2* | 0.03099 | 0.10014   |
| Monogenea                        | 28S  | Neothoracocotylidae                | 12        | Diplectanidae (14)                  | 0.72          | 17         | Allodiscocotylidae            | -2214.1 | -2130.3* | 0.04157 | 1.01142   |

| Data set | Gene | Goliath (big) species | Size, mm | David (little) species | Size, mm | Size ratio | Outgroup | LC | FR | Big BL | Little BL |
|----------|------|-----------------------|----------|------------------------|----------|------------|----------|----|----|--------|-----------|
|          |      | (14)                  |          |                        |          |            |          |    |    |        |           |

1. Garcia-Barros, E. (2000) *J. Res. Lepidop.* **35**, 90-136.
2. Arnedo, M. A. & Ribera, C. (1997) *Zool. Scripta* **26**, 205-243.
3. Arnedo, M. A. & Ribera, C. (1999) *J. Arachnol.* **27**, 604-662.
4. Roberts, M. J. (1985) *The Spiders of Great Britain and Ireland* (Harley Books, Colchester, U.K.).
5. Kaston, B. J. (1948) *Spiders of Connecticut* (State Geological and Natural History Survey, Hartford, CT.).
6. Wood, J. B. & Day, C. L. (2006) *CephBase*, <http://www.cephbase.utmb.edu/>.
7. Hayward, P. J., D., W. G. & Yonow, N. (1990) *The Marine fauna of the British isles and North–West Europe* (Clarendon Press, Oxford).
8. Kerney, M. P. & Cameron, R. A. D. (1979) *A Field Guide to the Land Snails of Britain and North–West Europe* (Collins, London).
9. Hayward, P., Nelson-Smith, T. & Sheilds, C. (1996) *Seashores of Britain and Europe* (HarperCollins Publishers, London).
10. Trouve, S., Sasal, P., Jourdane, J., Renaud, F. & Morand, S. (1998) *Oecologia* **115**, 370-378.
11. Mayhew, P. J. (1998) *Proc. R. Soc. London B* **265**, 383-389.
12. Roy, K., Jablonski, D. & Valentine, J. W. (2001) *Ecol. Lett.* **4**, 366-370.
13. McHugh, D. & Fong, P. P. (2002) *Invertebr. Biol.* **121**, 325-338.
14. Poulin, R. (2002) *Int. J. Parasit.* **32**, 245-254.
