# Supplementary material
Source: PubMed Central journal article supplement (PMC1464347)
Supplement: pnas_0510251103_6.pdf [file pnas_0510251103_6.pdf]

**Appendix 5.** Comparison pairs with branch lengths (BL) and body size (BS) measurements in millimeters (geometric mean unless otherwise stated), together with log ratios, for “Big” and “Little” species included in the analysis. Geometric means for the Gastropoda (excluding slugs) and Bivalvia are calculated for body size area (in squared millimeters). Where either branch length was zero, the log ratio is undefined. References in parentheses indicate sources of independent phylogenies. For gene abbreviations see *Materials and Methods* in the main text.

| Data set                 | Big species                   | Little species               | BL big  | BL little | BS big | BS little | ln (BS <sub>Big</sub> /BS <sub>Little</sub> ) | ln ( $\lambda_{Big}/\lambda_{Little}$ ) |
|--------------------------|-------------------------------|------------------------------|---------|-----------|--------|-----------|-----------------------------------------------|-----------------------------------------|
| <b>Lepidoptera (1-8)</b> |                               |                              |         |           |        |           |                                               |                                         |
| COII                     | <i>Allancastris cerisyi</i>   | <i>Zerynthia rumina</i>      | 0.15161 | 0.09962   | 28.0   | 25.3      | 0.10140                                       | 0.41995                                 |
|                          | <i>Anartia fatima</i>         | <i>Anartia amanthea</i>      | 0.05316 | 0.06811   | 28.5   | 26.0      | 0.09181                                       | -0.24782                                |
|                          | <i>Anartia lytrea</i>         | <i>Anartia jatrophae</i>     | 0.20015 | 0.16367   | 30.5   | 20.0      | 0.42199                                       | 0.20121                                 |
|                          | <i>Arhopala muta</i>          | <i>Plebeius argus</i>        | 0.07641 | 0.05761   | 16.5   | 14.0      | 0.16430                                       | 0.28242                                 |
|                          | <i>Dione juno</i>             | <i>Dione glycera</i>         | 0.23316 | 0.23944   | 38.4   | 35.0      | 0.09271                                       | -0.02658                                |
|                          | <i>Dryas julia</i>            | <i>Podotricha telesiphe</i>  | 0.15708 | 0.08633   | 43.5   | 38.0      | 0.13517                                       | 0.59858                                 |
|                          | <i>Eueides lineata</i>        | <i>Eueides lybia</i>         | 0.24145 | 0.15716   | 34.5   | 31.5      | 0.09097                                       | 0.42940                                 |
|                          | <i>Eueides procula</i>        | <i>Eueides vibilia</i>       | 0.07023 | 0.14920   | 34.5   | 32.0      | 0.07522                                       | -0.75351                                |
|                          | <i>Eueides tales</i>          | <i>Eueides aliphera</i>      | 0.17339 | 0.14225   | 35.5   | 30.0      | 0.16834                                       | 0.19796                                 |
|                          | <i>Heliconius burneyi</i>     | <i>Heliconius wallacei</i>   | 0.11838 | 0.05209   | 46.0   | 40.0      | 0.13976                                       | 0.82093                                 |
|                          | <i>Heliconius charithonia</i> | <i>Heliconius ricini</i>     | 0.06705 | 0.08291   | 40.0   | 34.4      | 0.15082                                       | -0.21232                                |
|                          | <i>Heliconius demeter</i>     | <i>Heliconius antiochus</i>  | 0.08012 | 0.05347   | 34.5   | 33.0      | 0.04445                                       | 0.40440                                 |
|                          | <i>Heliconius egeria</i>      | <i>Heliconius xanthocles</i> | 0.05114 | 0.07304   | 46.0   | 38.5      | 0.17798                                       | -0.35644                                |
|                          | <i>Heliconius eleuchia</i>    | <i>Heliconius sapho</i>      | 0.20896 | 0.12728   | 39.0   | 37.0      | 0.05264                                       | 0.49575                                 |
|                          | <i>Heliconius ethilla</i>     | <i>Heliconius besckei</i>    | 0.03169 | 0.03013   | 42.0   | 34.5      | 0.19671                                       | 0.05048                                 |
|                          | <i>Heliconius hecalasia</i>   | <i>Heliconius erato</i>      | 0.12328 | 0.10275   | 46.5   | 40.5      | 0.13815                                       | 0.18216                                 |
|                          | <i>Heliconius hecale</i>      | <i>Heliconius atthis</i>     | 0.04862 | 0.01714   | 44.0   | 40.5      | 0.08289                                       | 1.04262                                 |
|                          | <i>Heliconius heurippa</i>    | <i>Heliconius melpomene</i>  | 0.07263 | 0.02024   | 44.0   | 38.0      | 0.14660                                       | 1.27772                                 |
|                          | <i>Heliconius ismenius</i>    | <i>Heliconius numata</i>     | 0.03767 | 0.07482   | 43.5   | 40.0      | 0.08388                                       | -0.68622                                |
|                          | <i>Heliconius leucadia</i>    | <i>Heliconius sara</i>       | 0.14395 | 0.07419   | 38.0   | 33.0      | 0.14108                                       | 0.66284                                 |
|                          | <i>Heliconius telesiphe</i>   | <i>Heliconius clysonymus</i> | 0.07711 | 0.10179   | 42.0   | 39.5      | 0.06137                                       | -0.27768                                |
|                          | <i>Japonica saepestriata</i>  | <i>Wagimo signatus</i>       | 0.25345 | 0.03124   | 21.0   | 15.5      | 0.30368                                       | 2.09347                                 |
|                          | <i>Maculineaalcon</i>         | <i>Celastrina argiolus</i>   | 0.05050 | 0.02929   | 17.5   | 14.5      | 0.18805                                       | 0.54473                                 |
|                          | <i>Maculinea arion</i>        | <i>Maculinea nausithous</i>  | 0.01189 | 0.05480   | 19.9   | 16.7      | 0.17531                                       | -1.52799                                |
|                          | <i>Neruda metharme</i>        | <i>Neruda aoede</i>          | 0.19352 | 0.13902   | 41.5   | 36.5      | 0.12838                                       | 0.33076                                 |
|                          | <i>Papilio anchisiades</i>    | <i>Papilio thoas</i>         | 0.36346 | 0.09661   | 52.5   | 48.5      | 0.07925                                       | 1.32499                                 |
|                          | <i>Papilio clytia</i>         | <i>Papilio alexanor</i>      | 0.14576 | 0.13349   | 52.0   | 42.0      | 0.21357                                       | 0.08793                                 |

| Data set   | Big species                     | Little species                  | BL big  | BL little | BS big | BS little | ln (BS <sub>Big</sub> /BS <sub>Little</sub> ) | ln ( $\lambda_{Big}/\lambda_{Little}$ ) |
|------------|---------------------------------|---------------------------------|---------|-----------|--------|-----------|-----------------------------------------------|-----------------------------------------|
|            | <i>Papilio dardanus</i>         | <i>Papilio demoleus</i>         | 0.20440 | 0.14585   | 46.9   | 41.0      | 0.13445                                       | 0.33750                                 |
|            | <i>Papilio paris</i>            | <i>Papilio indra</i>            | 0.09466 | 0.03717   | 48.5   | 38.5      | 0.23091                                       | 0.93479                                 |
|            | <i>Parides photinus</i>         | <i>Iphiclides podalirius</i>    | 0.15115 | 0.17684   | 47.5   | 39.5      | 0.18443                                       | -0.15697                                |
|            | <i>Pieris napi</i>              | <i>Pyrgus communis</i>          | 0.44714 | 0.06053   | 22.5   | 13.5      | 0.51083                                       | 1.99958                                 |
|            | <i>Polyommatus icarus</i>       | <i>Polyommatus thersites</i>    | 0.22928 | 0.07023   | 15.2   | 14.0      | 0.08224                                       | 1.18317                                 |
|            | <i>Serinicus montela</i>        | <i>Luehdorfia japonica</i>      | 0.22382 | 0.43755   | 37.0   | 31.0      | 0.17693                                       | -0.67035                                |
|            | <i>Siproeta stelenes</i>        | <i>Junonia evarete</i>          | 0.09147 | 0.09461   | 46.5   | 27.5      | 0.52527                                       | -0.03375                                |
|            | <i>Speyeria idalia</i>          | <i>Acraea encedon</i>           | 0.46920 | 0.31306   | 41.5   | 29.5      | 0.34130                                       | 0.40463                                 |
|            | <i>Thyridia psidii</i>          | <i>Apodemia mormo</i>           | 0.24898 | 0.30243   | 41.5   | 15.5      | 0.98485                                       | -0.19448                                |
|            | <i>Tirumala hamata</i>          | <i>Coenonympha tullia</i>       | 0.27296 | 0.30463   | 41.0   | 18.9      | 0.77441                                       | -0.10977                                |
|            | <i>Troides helena</i>           | <i>Atrophaneura alcinous</i>    | 0.34436 | 0.16656   | 81.0   | 54.0      | 0.40547                                       | 0.72633                                 |
| <b>ND5</b> | <i>Colias palaeno</i>           | <i>Eurema hecabe</i>            | 0.14701 | 0.17933   | 25.0   | 22.5      | 0.10536                                       | -0.19873                                |
|            | <i>Aporia crataegi</i>          | <i>Anthocharis cardamines</i>   | 0.10849 | 0.10617   | 32.3   | 21.0      | 0.43054                                       | 0.02162                                 |
|            | <i>Curetis acuta</i>            | <i>Zizina otis</i>              | 0.12224 | 0.16003   | 22.8   | 10.5      | 0.77539                                       | -0.26937                                |
|            | <i>Troides hypolitus</i>        | <i>Troides amphrysus</i>        | 0.08830 | 0.07602   | 87.5   | 77.0      | 0.12783                                       | 0.14974                                 |
|            | <i>Atrophaneura polyeuctes</i>  | <i>Pachliopta aristolochiae</i> | 0.09336 | 0.10249   | 57.0   | 48.0      | 0.17185                                       | -0.09330                                |
|            | <i>Pharmacophagus antenor</i>   | <i>Cressida cressida</i>        | 0.11993 | 0.14624   | 68.5   | 50.5      | 0.30486                                       | -0.19834                                |
|            | <i>Battus polydamas</i>         | <i>Papilio machaon</i>          | 0.12307 | 0.12107   | 48.0   | 40.0      | 0.18232                                       | 0.01638                                 |
|            | <i>Graphium leonidas</i>        | <i>Graphium eurypylus</i>       | 0.08273 | 0.06216   | 47.5   | 38.0      | 0.22314                                       | 0.28587                                 |
|            | <i>Graphium antiphates</i>      | <i>Graphium aristeus</i>        | 0.12425 | 0.09251   | 55.0   | 39.6      | 0.32850                                       | 0.29498                                 |
|            | <i>Graphium sarpedon</i>        | <i>Artopoetes pryeri</i>        | 0.0000  | 0.00442   | 24.5   | 23.0      | 0.68222                                       |                                         |
|            | <i>Luehdorfia longicaudata</i>  | <i>Luehdorfia puziloi</i>       | 0.02108 | 0.05018   | 35.0   | 29.5      | 0.17096                                       | -0.86729                                |
|            | <i>Archon apollinus</i>         | <i>Hypermnestra helios</i>      | 0.05891 | 0.11341   | 28.3   | 26.9      | 0.05074                                       | -0.65500                                |
|            | <i>Parnassius szechenyii</i>    | <i>Parnassius acco</i>          | 0.04935 | 0.01050   | 33.0   | 27.9      | 0.16788                                       | 1.54756                                 |
|            | <i>Parnassius imperator</i>     | <i>Parnassius acdestis</i>      | 0.05735 | 0.03844   | 40.1   | 28.5      | 0.34147                                       | 0.40007                                 |
|            | <i>Parnassius autocrator</i>    | <i>Parnassius loxias</i>        | 0.03124 | 0.03352   | 36.0   | 33.5      | 0.07197                                       | -0.07044                                |
|            | <i>Parnassius maximinus</i>     | <i>Parnassius delphius</i>      | 0.00315 | 0.00074   | 36.0   | 31.0      | 0.14953                                       | 1.44851                                 |
|            | <i>Parnassius ariadne</i>       | <i>Parnassius mnemosyne</i>     | 0.03042 | 0.02098   | 34.5   | 30.8      | 0.11344                                       | 0.37153                                 |
|            | <i>Parnassius nordmanni</i>     | <i>Parnassius simo</i>          | 0.04477 | 0.03440   | 33.0   | 24.5      | 0.29783                                       | 0.26348                                 |
|            | <i>Parnassius glacialis</i>     | <i>Parnassius stubbendorfi</i>  | 0.03099 | 0.03904   | 37.3   | 32.5      | 0.13775                                       | -0.23092                                |
|            | <i>Parnassius apollonius</i>    | <i>Parnassius hardwickii</i>    | 0.02953 | 0.06800   | 39.5   | 29.1      | 0.30556                                       | -0.83410                                |
|            | <i>Parnassius tianschanicus</i> | <i>Parnassius epaphus</i>       | 0.01785 | 0.01524   | 39.5   | 27.0      | 0.38046                                       | 0.15808                                 |

| Data set   | Big species                   | Little species                | BL big  | BL little | BS big | BS little | ln (BS <sub>Big</sub> /BS <sub>Little</sub> ) | ln ( $\lambda_{Big}/\lambda_{Little}$ ) |
|------------|-------------------------------|-------------------------------|---------|-----------|--------|-----------|-----------------------------------------------|-----------------------------------------|
|            | <i>Parnassius apollo</i>      | <i>Parnassius jaquemontii</i> | 0.02315 | 0.01294   | 39.5   | 33.5      | 0.16476                                       | 0.58167                                 |
|            | <i>Seriginus montela</i>      | <i>Zerynthia rumina</i>       | 0.09955 | 0.13583   | 37.0   | 25.3      | 0.38011                                       | -0.31074                                |
|            | <i>Idea leuconoe</i>          | <i>Euploea mulciber</i>       | 0.13944 | 0.07283   | 61.0   | 51.5      | 0.16929                                       | 0.64951                                 |
|            | <i>Lethe diana</i>            | <i>Mycalesis gotama</i>       | 0.07869 | 0.22765   | 27.0   | 25.5      | 0.05716                                       | -1.06229                                |
|            | <i>Minois dryas</i>           | <i>Aglais urticae</i>         | 0.23917 | 0.12092   | 32.7   | 23.8      | 0.31769                                       | 0.68205                                 |
|            | <i>Limenitis populi</i>       | <i>Limenitis camilla</i>      | 0.09605 | 0.07450   | 40.0   | 28.0      | 0.35667                                       | 0.25407                                 |
|            | <i>Argyreus hyperbius</i>     | <i>Argynnis paphia</i>        | 0.06988 | 0.05083   | 39.0   | 33.0      | 0.16705                                       | 0.31829                                 |
| <b>COI</b> | <i>Heliconius hecale</i>      | <i>Heliconius atthis</i>      | 0.00000 | 0.00966   | 44.0   | 40.5      | 0.08289                                       |                                         |
|            | <i>Heliconius ethilla</i>     | <i>Heliconius besckei</i>     | 0.03683 | 0.05085   | 42.0   | 34.5      | 0.19671                                       | -0.32257                                |
|            | <i>Heliconius telesiphe</i>   | <i>Heliconius clysonymus</i>  | 0.06678 | 0.10601   | 42.0   | 39.5      | 0.06137                                       | -0.46213                                |
|            | <i>Heliconius egeria</i>      | <i>Heliconius xanthocles</i>  | 0.03228 | 0.07948   | 46.0   | 38.5      | 0.17798                                       | -0.90106                                |
|            | <i>Heliconius burneyi</i>     | <i>Heliconius wallacei</i>    | 0.04317 | 0.05413   | 46.0   | 40.0      | 0.13976                                       | -0.22624                                |
|            | <i>Neruda metharme</i>        | <i>Neruda aoede</i>           | 0.07631 | 0.09355   | 41.5   | 36.5      | 0.12838                                       | -0.20369                                |
|            | <i>Erebia palarica</i>        | <i>Erebia meolans</i>         | 0.01667 | 0.01726   | 26.7   | 22.9      | 0.15353                                       | -0.03478                                |
|            | <i>Erebia triaria</i>         | <i>Erebia cassioides</i>      | 0.03485 | 0.06068   | 24.5   | 18.4      | 0.28632                                       | -0.55456                                |
|            | <i>Charaxes castor</i>        | <i>Bicyclus anynana</i>       | 0.09387 | 0.10300   | 52.5   | 21.2      | 0.90681                                       | -0.09282                                |
|            | <i>Allancastris cerisyi</i>   | <i>Zerynthia rumina</i>       | 0.08975 | 0.13841   | 28.0   | 25.3      | 0.10140                                       | -0.43319                                |
|            | <i>Seriginus montela</i>      | <i>Luehdorfia japonica</i>    | 0.08513 | 0.09046   | 37.0   | 31.0      | 0.17693                                       | -0.06073                                |
|            | <i>Papilio anchisiades</i>    | <i>Papilio thoas</i>          | 0.10778 | 0.13194   | 52.5   | 48.5      | 0.07925                                       | -0.20226                                |
|            | <i>Papilio clytia</i>         | <i>Papilio alexanor</i>       | 0.14196 | 0.20086   | 52.0   | 42.0      | 0.21357                                       | -0.34706                                |
|            | <i>Iphiclides podalirius</i>  | <i>Apodemia mormo</i>         | 0.12195 | 0.12485   | 39.5   | 15.5      | 0.93546                                       | -0.02350                                |
|            | <i>Euphydryas phaeton</i>     | <i>Euphydryas maturna</i>     | 0.03008 | 0.07064   | 28.0   | 21.0      | 0.28768                                       | -0.85374                                |
|            | <i>Melitaea deione</i>        | <i>Melitaea britomartis</i>   | 0.03189 | 0.03556   | 20.9   | 17.0      | 0.20654                                       | -0.10893                                |
|            | <i>Chlosyne nycteis</i>       | <i>Phyciodes tharos</i>       | 0.05752 | 0.09351   | 20.5   | 17.6      | 0.15253                                       | -0.48594                                |
|            | <i>Anartia fatima</i>         | <i>Anartia amanthea</i>       | 0.02001 | 0.0464    | 28.5   | 26.0      | 0.09181                                       | -0.84107                                |
|            | <i>Anartia lytrea</i>         | <i>Anartia jatrophae</i>      | 0.08046 | 0.08867   | 30.5   | 20.0      | 0.42199                                       | -0.09716                                |
|            | <i>Hamadryas februa</i>       | <i>Sallya boisduvali</i>      | 0.13755 | 0.16781   | 36.0   | 23.3      | 0.43507                                       | -0.19884                                |
|            | <i>Apatura iris</i>           | <i>Asterocampa leilia</i>     | 0.11933 | 0.15837   | 37.5   | 24.1      | 0.44213                                       | -0.28304                                |
|            | <i>Heliconius ismenius</i>    | <i>Heliconius numata</i>      | 0.04195 | 0.03647   | 43.5   | 40.0      | 0.08388                                       | 0.13999                                 |
|            | <i>Heliconius heurippa</i>    | <i>Heliconius melpomene</i>   | 0.02356 | 0.00741   | 44.0   | 38.0      | 0.14660                                       | 1.15672                                 |
|            | <i>Heliconius eleuchia</i>    | <i>Heliconius congener</i>    | 0.0737  | 0.04755   | 39.0   | 37.0      | 0.05264                                       | 0.43822                                 |
|            | <i>Heliconius leucadia</i>    | <i>Heliconius sara</i>        | 0.08211 | 0.01177   | 38.0   | 33.0      | 0.14108                                       | 1.94251                                 |
|            | <i>Heliconius hecalasia</i>   | <i>Heliconius erato</i>       | 0.09599 | 0.07414   | 46.5   | 40.5      | 0.13815                                       | 0.25829                                 |
|            | <i>Heliconius charithonia</i> | <i>Heliconius ricini</i>      | 0.06298 | 0.05822   | 40.0   | 34.4      | 0.15082                                       | 0.07859                                 |

| Data set | Big species                      | Little species                | BL big  | BL little | BS big | BS little | ln (BS <sub>Big</sub> /BS <sub>Little</sub> ) | ln ( $\lambda_{Big}/\lambda_{Little}$ ) |
|----------|----------------------------------|-------------------------------|---------|-----------|--------|-----------|-----------------------------------------------|-----------------------------------------|
|          | <i>Eueides procula</i>           | <i>Eueides vibilia</i>        | 0.05896 | 0.03491   | 34.5   | 32.0      | 0.07522                                       | 0.52409                                 |
|          | <i>Eueides lineata</i>           | <i>Eueides aliphera</i>       | 0.09150 | 0.02224   | 34.5   | 30.0      | 0.13976                                       | 1.41445                                 |
|          | <i>Dione juno</i>                | <i>Dione glycera</i>          | 0.17557 | 0.12805   | 38.4   | 35.0      | 0.09271                                       | 0.31562                                 |
|          | <i>Dryas julia</i>               | <i>Dryadula phaetusa</i>      | 0.19253 | 0.15179   | 43.5   | 40.5      | 0.07146                                       | 0.23775                                 |
|          | <i>Arhopala muta</i>             | <i>Plebeius argus</i>         | 0.12743 | 0.04054   | 16.5   | 14.0      | 0.16430                                       | 1.14528                                 |
|          | <i>Japonica saepestriata</i>     | <i>Wagimo signatus</i>        | 0.16207 | 0.02139   | 21.0   | 15.5      | 0.30368                                       | 2.02510                                 |
|          | <i>Polyommatus icarus</i>        | <i>Polyommatus thersites</i>  | 0.07806 | 0.06556   | 15.2   | 14.0      | 0.08224                                       | 0.17451                                 |
|          | <i>Erebia ligea</i>              | <i>Erebia epiphron</i>        | 0.05056 | 0.04222   | 24.3   | 17.5      | 0.32828                                       | 0.18027                                 |
|          | <i>Maniola jurtina</i>           | <i>Aphantopus hyperantus</i>  | 0.11073 | 0.10222   | 25.8   | 21.2      | 0.19637                                       | 0.07997                                 |
|          | <i>Papilio paris</i>             | <i>Papilio indra</i>          | 0.07933 | 0.05212   | 48.5   | 38.5      | 0.23091                                       | 0.42007                                 |
|          | <i>Papilio demodocus</i>         | <i>Papilio demoleus</i>       | 0.06537 | 0.05254   | 46.0   | 41.0      | 0.11507                                       | 0.21849                                 |
|          | <i>Troides helena</i>            | <i>Atrophaneura alcinous</i>  | 0.11368 | 0.08844   | 81.0   | 54.0      | 0.40547                                       | 0.25106                                 |
|          | <i>Erynnis tristis</i>           | <i>Pyrgus communis</i>        | 0.19379 | 0.14537   | 18.9   | 13.5      | 0.33647                                       | 0.28749                                 |
|          | <i>Melitaea didyma</i>           | <i>Melitaea aurelia</i>       | 0.06586 | 0.0656    | 22.0   | 16.5      | 0.28768                                       | 0.00396                                 |
|          | <i>Junonia evarete</i>           | <i>Junonia coenia</i>         | 0.04575 | 0.03567   | 27.5   | 25.5      | 0.07551                                       | 0.24888                                 |
|          | <i>Speyeria idalia</i>           | <i>Argynnis paphia</i>        | 0.11986 | 0.09996   | 41.5   | 33.0      | 0.22919                                       | 0.18155                                 |
|          | <i>Cercyonis pegala</i>          | <i>Lasiommata megera</i>      | 0.13555 | 0.12058   | 29.8   | 22.4      | 0.28545                                       | 0.11703                                 |
|          | <i>Hipparchia semele</i>         | <i>Hipparchia azorina</i>     | 0.00766 | 0.00000   | 26.8   | 24.1      | 0.10619                                       | 0.00000                                 |
|          | <i>Acraea encedon</i>            | <i>Anthocharis cardamines</i> | 0.18089 | 0.09497   | 29.5   | 21.0      | 0.33987                                       | 0.64433                                 |
|          | <i>Vanessa atalanta</i>          | <i>Aglais urticae</i>         | 0.09214 | 0.05033   | 30.0   | 23.8      | 0.23151                                       | 0.60471                                 |
|          | <i>Acrodipsas illidgei</i>       | <i>Paralucia pyrodiscus</i>   | 0.08523 | 0.08243   | 13.9   | 12.5      | 0.10616                                       | 0.03340                                 |
|          | <i>Luehdorfia longicaudata</i>   | <i>Luehdorfia puziloi</i>     | 0.05292 | 0.00947   | 35.0   | 29.5      | 0.17096                                       | 1.72065                                 |
|          | <i>Colias croceus</i>            | <i>Eurema lisa</i>            | 0.24165 | 0.17847   | 25.5   | 17.0      | 0.40547                                       | 0.30307                                 |
|          | <i>Gonepteryx cleobule</i>       | <i>Gonepteryx rhamni</i>      | 0.04628 | 0.02071   | 37.0   | 28.1      | 0.27515                                       | 0.80409                                 |
|          | <i>Limenitis populi</i>          | <i>Limenitis reductis</i>     | 0.06384 | 0.05985   | 40.0   | 25.3      | 0.45808                                       | 0.06454                                 |
|          | <i>Coenonympha tullia</i>        | <i>Coenonympha pamphilus</i>  | 0.05281 | 0.07741   | 18.9   | 16.6      | 0.12976                                       | -0.38242                                |
|          | <i>Amnosia decora</i>            | <i>Eurytela dryope</i>        | 0.15645 | 0.23972   | 24.5   | 28.5      | 0.42286                                       | -0.42674                                |
|          | <i>Antanartia schaeneia</i>      | <i>Araschnia levana</i>       | 0.07306 | 0.08642   | 26.2   | 18.0      | 0.37539                                       | -0.16794                                |
|          | <i>Nymphalis antiopa</i>         | <i>Nymphalis polychloros</i>  | 0.04238 | 0.04301   | 33.8   | 30.5      | 0.10273                                       | -0.01476                                |
|          | <i>Polygonia interrogationis</i> | <i>Polygonia progne</i>       | 0.02532 | 0.04181   | 29.0   | 25.5      | 0.12862                                       | -0.50154                                |
|          | <i>Polygonia faunus</i>          | <i>Polygonia c-album</i>      | 0.04309 | 0.04338   | 27.5   | 23.3      | 0.16573                                       | -0.00671                                |
|          | <i>Crudaria leroma</i>           | <i>Chrysoritis zeuxo</i>      | 0.09140 | 0.10747   | 15.6   | 13.4      | 0.15202                                       | -0.16197                                |
|          | <i>Tylopaedia sardonix</i>       | <i>Trimenia argyroplaga</i>   | 0.08518 | 0.09717   | 22.0   | 17.6      | 0.22314                                       | -0.13170                                |

| Data set               | Big species                  | Little species                | BL<br>big | BL<br>little | BS big | BS<br>little | ln<br>(BS <sub>Big</sub> /BS <sub>Little</sub> ) | ln ( $\lambda_{Big}/\lambda_{Little}$ ) |
|------------------------|------------------------------|-------------------------------|-----------|--------------|--------|--------------|--------------------------------------------------|-----------------------------------------|
|                        | <i>Pieris rapae</i>          | <i>Pieris napi</i>            | 0.03271   | 0.11349      | 24.5   | 22.5         | 0.08516                                          | -1.24403                                |
|                        | <i>Parnassius apollo</i>     | <i>Parnassius phoebus</i>     | 0.01782   | 0.04322      | 39.5   | 36.0         | 0.09278                                          | -0.88598                                |
|                        | <i>Danaus plexippus</i>      | <i>Danaus gilippus</i>        | 0.04929   | 0.08638      | 45.8   | 33.5         | 0.31274                                          | -0.56103                                |
| <b>Arachnida (9)</b>   |                              |                               |           |              |        |              |                                                  |                                         |
| <b>COI</b>             | <i>Phlegra fasciata</i>      | <i>Neon nelli</i>             | 0.12605   | 0.15157      | 7.5    | 2.6          | 1.04692                                          | -0.18437                                |
|                        | <i>Nephila clavata</i>       | <i>Tegenaria saeva</i>        | 0.15219   | 0.15931      | 22.9   | 13.3         | 0.54646                                          | -0.04572                                |
|                        | <i>Dysdera labradaensis</i>  | <i>Dysdera ambulotenta</i>    | 0.11056   | 0.13458      | 18.1   | 14.2         | 0.24362                                          | -0.19660                                |
|                        | <i>Dysdera enghoffi</i>      | <i>Dysdera rugichelis</i>     | 0.08531   | 0.14463      | 15.3   | 11.8         | 0.26315                                          | -0.52789                                |
|                        | <i>Dysdera chioensis</i>     | <i>Dysdera guayota</i>        | 0.09680   | 0.12056      | 8.9    | 7.0          | 0.24168                                          | -0.21950                                |
|                        | <i>Dysdera verneau</i>       | <i>Dysdera paucispinosa</i>   | 0.05072   | 0.09714      | 11.6   | 4.9          | 0.85745                                          | -0.64983                                |
|                        | <i>Dysdera insulana</i>      | <i>Dysdera unguimmanis</i>    | 0.05649   | 0.16581      | 25.3   | 9.6          | 0.96750                                          | -1.07678                                |
|                        | <i>Dysdera brevisetae</i>    | <i>Dysdera esquiveli</i>      | 0.04917   | 0.10653      | 8.3    | 4.8          | 0.54175                                          | -0.77314                                |
|                        | <i>Hypochilus thorelli</i>   | <i>Evarcha hoyi</i>           | 0.43764   | 0.23411      | 14.0   | 5.4          | 0.95575                                          | 0.62561                                 |
|                        | <i>Bolyphantes alticeps</i>  | <i>Erigone dentipalpis</i>    | 0.22836   | 0.11443      | 4.0    | 2.2          | 0.60677                                          | 0.69096                                 |
|                        | <i>Linyphia triangularis</i> | <i>Neriene radiata</i>        | 0.10993   | 0.09655      | 5.7    | 4.8          | 0.18597                                          | 0.12978                                 |
|                        | <i>Dysdera crocota</i>       | <i>Dysdera erythina</i>       | 0.16468   | 0.12215      | 12.9   | 9.5          | 0.30307                                          | 0.29875                                 |
|                        | <i>Dysdera aleganzaensis</i> | <i>Dysdera spinidorsum</i>    | 0.12775   | 0.10109      | 16.0   | 10.8         | 0.39427                                          | 0.23406                                 |
|                        | <i>Dysdera longa</i>         | <i>Dysdera sanborondon</i>    | 0.17971   | 0.07981      | 17.8   | 9.6          | 0.61792                                          | 0.81170                                 |
|                        | <i>Dysdera ramblae</i>       | <i>Dysdera calderensis</i>    | 0.13062   | 0.04671      | 19.1   | 8.2          | 0.84555                                          | 1.02833                                 |
|                        | <i>Dysdera arabisenen</i>    | <i>Dysdera yguanirae</i>      | 0.11837   | 0.05486      | 20.2   | 8.2          | 0.90568                                          | 0.76903                                 |
| <i>Dysdera levipes</i> | <i>Dysdera gollumi</i>       | 0.08568                       | 0.07088   | 6.2          | 5.3    | 0.15978      | 0.18963                                          |                                         |
| <b>16S</b>             | <i>Linyphia triangularis</i> | <i>Lepthyphantes minutus</i>  | 0.11851   | 0.15475      | 5.7    | 3.7          | 0.42873                                          | -0.26681                                |
|                        | <i>Tegenaria saeva</i>       | <i>Neon nelli</i>             | 0.18633   | 0.24302      | 13.3   | 2.6          | 1.61948                                          | -0.26562                                |
|                        | <i>Schizocosa crassipes</i>  | <i>Pardosa milvina</i>        | 0.07739   | 0.07981      | 7.3    | 5.7          | 0.25417                                          | -0.03079                                |
|                        | <i>Araneus diadematus</i>    | <i>Nesticus barri</i>         | 0.26957   | 0.49426      | 11.4   | 4.7          | 0.88620                                          | -0.60623                                |
|                        | <i>Dysdera labradaensis</i>  | <i>Dysdera ambulotenta</i>    | 0.01729   | 0.05612      | 18.1   | 14.2         | 0.24362                                          | -1.17736                                |
|                        | <i>Dysdera chioensis</i>     | <i>Dysdera guayota</i>        | 0.03071   | 0.03400      | 8.9    | 7.0          | 0.24168                                          | -0.10177                                |
|                        | <i>Dysdera verneau</i>       | <i>Dysdera paucispinosa</i>   | 0.03124   | 0.06317      | 11.6   | 4.9          | 0.85745                                          | -0.70413                                |
|                        | <i>Dysdera insulana</i>      | <i>Dysdera cribellata</i>     | 0.03897   | 0.04437      | 25.3   | 8.7          | 1.07367                                          | -0.12977                                |
|                        | <i>Dysdera ramblae</i>       | <i>Dysdera calderensis</i>    | 0.02108   | 0.03539      | 19.1   | 8.2          | 0.84555                                          | -0.51810                                |
|                        | <i>Dysdera arabisenen</i>    | <i>Dysdera yguanirae</i>      | 0.03827   | 0.04652      | 20.7   | 8.2          | 0.90568                                          | -0.19522                                |
|                        | <i>Dysdera levipes</i>       | <i>Dysdera gollumi</i>        | 0.04418   | 0.05663      | 6.2    | 5.3          | 0.15978                                          | -0.24827                                |
|                        | <i>Dysdera crocota</i>       | <i>Dysdera lancerotensis</i>  | 0.16357   | 0.30484      | 12.9   | 9.8          | 0.27059                                          | -0.62255                                |
|                        | <i>Habronattus viridipes</i> | <i>Habronattus calcaratus</i> | 0.01237   | 0.00463      | 6.2    | 5.0          | 0.21589                                          | 0.98272                                 |

| Data set                | Big species                      | Little species                 | BL<br>big | BL<br>little | BS big | BS<br>little | ln<br>(BS <sub>Big</sub> /BS <sub>Little</sub> ) | ln ( $\lambda_{Big}/\lambda_{Little}$ ) |
|-------------------------|----------------------------------|--------------------------------|-----------|--------------|--------|--------------|--------------------------------------------------|-----------------------------------------|
|                         | <i>Phlegra fasciata</i>          | <i>Synemosyna formica</i>      | 0.21989   | 0.14813      | 7.5    | 5.2          | 0.36866                                          | 0.39504                                 |
|                         | <i>Nesticus holsingeri</i>       | <i>Nesticus mimus</i>          | 0.08238   | 0.07139      | 4.5    | 3.4          | 0.28030                                          | 0.14318                                 |
|                         | <i>Nesticus brimleyi</i>         | <i>Nesticus stupkai</i>        | 0.09374   | 0.05383      | 4.5    | 3.7          | 0.19574                                          | 0.55469                                 |
|                         | <i>Nesticus carteri</i>          | <i>Nesticus sheari</i>         | 0.07989   | 0.04705      | 3.2    | 1.8          | 0.57536                                          | 0.52944                                 |
|                         | <i>Nesticus jonesi</i>           | <i>Nesticus reclusus</i>       | 0.04929   | 0.03574      | 5.0    | 2.7          | 0.61619                                          | 0.32145                                 |
|                         | <i>Dysdera erythrina</i>         | <i>Harpactea hombergi</i>      | 0.23800   | 0.06237      | 9.5    | 6.5          | 0.38107                                          | 1.33919                                 |
|                         | <i>Dysdera alegranzaensis</i>    | <i>Dysdera spinidorsum</i>     | 0.05947   | 0.02282      | 16.0   | 10.8         | 0.39427                                          | 0.95783                                 |
|                         | <i>Dysdera longa</i>             | <i>Dysdera sanborondon</i>     | 0.05228   | 0.02176      | 17.8   | 9.6          | 0.61792                                          | 0.87654                                 |
|                         | <i>Dysdera brevisetae</i>        | <i>Dysdera esquiveli</i>       | 0.04148   | 0.04048      | 8.3    | 4.8          | 0.54175                                          | 0.02440                                 |
| <b>Cephalopoda (10)</b> |                                  |                                |           |              |        |              |                                                  |                                         |
| <b>COI</b>              | <i>Vitreledonella richardi</i>   | <i>Amphitretus pelagicus</i>   | 0.09828   | 0.19492      | 110.0  | 100.0        | 0.09531                                          | -0.68477                                |
|                         | <i>Graneledone boreopacifica</i> | <i>Graneledone antarctica</i>  | 0.01254   | 0.01930      | 90.0   | 40.0         | 0.81093                                          | -0.43118                                |
|                         | <i>Bathypolypus valdiviae</i>    | <i>Bathypolypus arcticus</i>   | 0.01535   | 0.05370      | 450.0  | 100.0        | 1.50408                                          | -1.25230                                |
|                         | <i>Tremoctopus violaceus</i>     | <i>Grimptoteuthis sp.</i>      | 0.09908   | 0.16839      | 180.0  | 115.0        | 0.44802                                          | -0.53036                                |
|                         | <i>Euprymna stenodactyla</i>     | <i>Euprymna morsei</i>         | 0.11037   | 0.12843      | 190.0  | 40.0         | 1.55814                                          | -0.15155                                |
|                         | <i>Euprymna berryi</i>           | <i>Euprymna tasmanica</i>      | 0.09222   | 0.09780      | 50.0   | 35.0         | 0.35667                                          | -0.05875                                |
|                         | <i>Rossia pacifica</i>           | <i>Rossia palpebrosa</i>       | 0.09126   | 0.11025      | 80.0   | 45.0         | 0.57536                                          | -0.18904                                |
|                         | <i>Loligo pealei</i>             | <i>Loligo plei</i>             | 0.06705   | 0.15160      | 500.0  | 350.0        | 0.35667                                          | -0.81581                                |
|                         | <i>Loligo gahi</i>               | <i>Loligo opalescens</i>       | 0.12131   | 0.14288      | 280.0  | 190.0        | 0.38777                                          | -0.16366                                |
|                         | <i>Loligo vulgaris</i>           | <i>Loligo reynaudi</i>         | 0.02931   | 0.03354      | 640.0  | 400.0        | 0.47000                                          | -0.13481                                |
|                         | <i>Sepioteuthis australis</i>    | <i>Sepioteuthis lessoniana</i> | 0.14260   | 0.18752      | 400.0  | 360.0        | 0.10536                                          | -0.27384                                |
|                         | <i>Haliphron atlanticus</i>      | <i>Argonauta nodosa</i>        | 0.12780   | 0.22376      | 400.0  | 100.0        | 1.38629                                          | -0.56011                                |
|                         | <i>Octopoteuthis nielsenii</i>   | <i>Brachioteuthis beanii</i>   | 0.12082   | 0.14820      | 200.0  | 150.0        | 0.28768                                          | -0.20426                                |
|                         | <i>Architeuthis sp.</i>          | <i>Cycloteuthis sirventi</i>   | 0.10919   | 0.15327      | 6000.0 | 40.0         | 5.01064                                          | -0.33911                                |
|                         | <i>Spirula spirula</i>           | <i>Chtenopteryx sicula</i>     | 0.11771   | 0.13897      | 200.0  | 40.0         | 1.60944                                          | -0.16603                                |
|                         | <i>Ancistrocheirus lesueuri</i>  | <i>Pyroteuthis addolux</i>     | 0.13611   | 0.19445      | 390.0  | 20.0         | 2.97041                                          | -0.35671                                |
|                         | <i>Enoploteuthis reticulata</i>  | <i>Abralia sp.</i>             | 0.11937   | 0.12787      | 130.0  | 70.0         | 0.61904                                          | -0.06879                                |
|                         | <i>Nautilus pompilius</i>        | <i>Hapalochlaena maculosa</i>  | 0.80300   | 0.27603      | 200.0  | 50.0         | 1.38629                                          | 1.06785                                 |
|                         | <i>Megaleledone senoi</i>        | <i>Pareledone charcoti</i>     | 0.06272   | 0.02342      | 250.0  | 43.0         | 1.76026                                          | 0.98509                                 |
|                         | <i>Octopus vulgaris</i>          | <i>Octopus bimaculoides</i>    | 0.10295   | 0.08879      | 250.0  | 140.0        | 0.57982                                          | 0.14797                                 |
|                         | <i>Eledonella pygmaea</i>        | <i>Japetella diaphana</i>      | 0.08369   | 0.03192      | 200.0  | 100.0        | 0.69315                                          | 0.96389                                 |
|                         | <i>Sepia aculeata</i>            | <i>Sepia robsoni</i>           | 0.06430   | 0.00000      | 230.0  | 20.0         | 2.44235                                          |                                         |

| Data set   | Big species                     | Little species                    | BL<br>big | BL<br>little | BS big | BS<br>little | ln<br>(BS <sub>Big</sub> /BS <sub>Little</sub> ) | ln ( $\lambda_{Big}/\lambda_{Little}$ ) |
|------------|---------------------------------|-----------------------------------|-----------|--------------|--------|--------------|--------------------------------------------------|-----------------------------------------|
|            | <i>Sepia pipara</i>             | <i>Idiosepius pygmaeus</i>        | 0.24111   | 0.20451      | 150.0  | 20.0         | 2.01490                                          | 0.16464                                 |
|            | <i>Sepiola robusta</i>          | <i>Sepiola affinis</i>            | 0.12125   | 0.04952      | 30.0   | 25.0         | 0.18232                                          | 0.89548                                 |
|            | <i>Loligo forbesi</i>           | <i>Loligo subulata</i>            | 0.10648   | 0.09186      | 900.0  | 200.0        | 1.50408                                          | 0.14769                                 |
|            | <i>Uroteuthis duvauceli</i>     | <i>Loliolus japonica</i>          | 0.13119   | 0.08396      | 290.0  | 120.0        | 0.88239                                          | 0.44631                                 |
|            | <i>Cirrothauma murrayi</i>      | <i>Stauroteuthis syrtensis</i>    | 0.13700   | 0.13423      | 220.0  | 90.0         | 0.89382                                          | 0.02043                                 |
|            | <i>Ommastrephes bartramii</i>   | <i>Sthenoteuthis oualaniensis</i> | 0.14605   | 0.10636      | 500.0  | 350.0        | 0.35667                                          | 0.31712                                 |
|            | <i>Chiroteuthis veranyi</i>     | <i>Valbyteuthis danae</i>         | 0.11524   | 0.08271      | 77.0   | 20.0         | 1.34807                                          | 0.33168                                 |
|            | <i>Pholidoteuthis adami</i>     | <i>Mastigoteuthis magna</i>       | 0.19727   | 0.07434      | 160.0  | 70.0         | 0.82668                                          | 0.97592                                 |
|            | <i>Histioteuthis hoylei</i>     | <i>Psychroteuthis glacialis</i>   | 0.11620   | 0.11528      | 130.0  | 20.0         | 1.87180                                          | 0.00795                                 |
|            | <i>Gonatus berryi</i>           | <i>Gonatus californiensis</i>     | 0.06164   | 0.03181      | 350.0  | 190.0        | 0.61091                                          | 0.66153                                 |
|            | <i>Gonatus onyx</i>             | <i>Gonatus fabricii</i>           | 0.06367   | 0.05029      | 330.0  | 110.0        | 1.09861                                          | 0.23591                                 |
|            | <i>Gonatopsis borealis</i>      | <i>Thysanoteuthis rhombus</i>     | 0.15391   | 0.14884      | 270.0  | 40.0         | 1.90954                                          | 0.03350                                 |
| <b>16S</b> | <i>Megaleledone senoi</i>       | <i>Pareledone charcoti</i>        | 0.00000   | 0.00408      | 250.0  | 43.0         | 1.76026                                          |                                         |
|            | <i>Cistopus indicus</i>         | <i>Octopus wolfi</i>              | 0.02287   | 0.04353      | 180.0  | 15.0         | 2.48491                                          | -0.64362                                |
|            | <i>Eledone moschata</i>         | <i>Eledone massyae</i>            | 0.03114   | 0.12483      | 150.0  | 80.0         | 0.62861                                          | -1.38846                                |
|            | <i>Euprymna berryi</i>          | <i>Euprymna scolopes</i>          | 0.01758   | 0.04685      | 50.0   | 30.0         | 0.51083                                          | -0.98019                                |
|            | <i>Loligo pealei</i>            | <i>Loligo plei</i>                | 0.00496   | 0.01040      | 500.0  | 350.0        | 0.35667                                          | -0.74040                                |
|            | <i>Loligo gahi</i>              | <i>Loligo opalescens</i>          | 0.00000   | 0.01202      | 280.0  | 190.0        | 0.38777                                          |                                         |
|            | <i>Loligo vulgaris</i>          | <i>Loligo reynaudi</i>            | 0.00000   | 0.04041      | 640.0  | 400.0        | 0.47000                                          |                                         |
|            | <i>Loligo forbesi</i>           | <i>Loligo subulata</i>            | 0.02224   | 0.05987      | 900.0  | 200.0        | 1.50408                                          | -0.99028                                |
|            | <i>Uroteuthis duvauceli</i>     | <i>Loliolus japonica</i>          | 0.00575   | 0.02487      | 290.0  | 120.0        | 0.88239                                          | -1.46446                                |
|            | <i>Sepioteuthis lessoniana</i>  | <i>Sepioteuthis sepioidea</i>     | 0.05222   | 0.15060      | 360.0  | 200.0        | 0.58779                                          | -1.05916                                |
|            | <i>Cirrothauma murrayi</i>      | <i>Stauroteuthis syrtensis</i>    | 0.02025   | 0.04399      | 220.0  | 90.0         | 0.89382                                          | -0.77581                                |
|            | <i>Enoplateuthis reticulata</i> | <i>Abralia trigonura</i>          | 0.02649   | 0.02668      | 130.0  | 40.0         | 1.17865                                          | -0.00715                                |
|            | <i>Nautilus belauensis</i>      | <i>Nautilus stenomphalus</i>      | 0.03485   | 0.00000      | 210.0  | 170.0        | 0.21131                                          |                                         |
|            | <i>Nautilus pompilius</i>       | <i>Hapalochlaena lunulata</i>     | 0.78029   | 0.04018      | 200.0  | 50.0         | 1.38629                                          | 2.96630                                 |
|            | <i>Octopus vulgaris</i>         | <i>Octopus bimaculoides</i>       | 0.02624   | 0.01560      | 250.0  | 140.0        | 0.57982                                          | 0.52001                                 |
|            | <i>Octopus mototi</i>           | <i>Octopus areolatus</i>          | 0.06258   | 0.05652      | 100.0  | 50.0         | 0.69315                                          | 0.10185                                 |
|            | <i>Octopus maorum</i>           | <i>Octopus pallidus</i>           | 0.03891   | 0.01033      | 300.0  | 150.0        | 0.69315                                          | 1.32620                                 |
|            | <i>Tremoctopus violaceus</i>    | <i>Japetella diaphana</i>         | 0.11090   | 0.09317      | 180.0  | 100.0        | 0.58779                                          | 0.17420                                 |
|            | <i>Cirroctopus glacialis</i>    | <i>Grimpoteuthis sp.</i>          | 0.07327   | 0.02778      | 170.0  | 115.0        | 0.39087                                          | 0.96983                                 |
|            | <i>Sepia orbignyana</i>         | <i>Sepia elegans</i>              | 0.06057   | 0.00000      | 120.0  | 90.0         | 0.28768                                          |                                         |
|            | <i>Sepia pharaonis</i>          | <i>Sepia esculenta</i>            | 0.04399   | 0.03435      | 430.0  | 180.0        | 0.87083                                          | 0.24736                                 |

| Data set                      | Big species                       | Little species                 | BL big  | BL little | BS big | BS little | ln (BS <sub>Big</sub> /BS <sub>Little</sub> ) | ln ( $\lambda_{Big}/\lambda_{Little}$ ) |
|-------------------------------|-----------------------------------|--------------------------------|---------|-----------|--------|-----------|-----------------------------------------------|-----------------------------------------|
|                               | <i>Sepia papuensis</i>            | <i>Idiosepius pygmaeus</i>     | 0.07676 | 0.05631   | 80.0   | 20.0      | 1.38629                                       | 0.30981                                 |
|                               |                                   | <i>Nototodarus</i>             |         |           |        |           |                                               |                                         |
|                               | <i>Sthenoteuthis oualaniensis</i> | <i>hawaiiensis</i>             | 0.03456 | 0.02382   | 350.0  | 160.0     | 0.78276                                       | 0.37217                                 |
|                               | <i>Spirula spirula</i>            | <i>Chtenopteryx sicula</i>     | 0.06287 | 0.02968   | 200.0  | 40.0      | 1.60944                                       | 0.75060                                 |
|                               | <i>Moroteuthis ingens</i>         | <i>Moroteuthis knipovitchi</i> | 0.00619 | 0.01750   | 940.0  | 350.0     | 0.98795                                       | -1.03927                                |
|                               | <i>Leachia pacifica</i>           | <i>Helicocranchia pfefferi</i> | 0.05860 | 0.02326   | 50.0   | 17.0      | 1.07881                                       | 0.92400                                 |
| <b>Gastropoda (11, 12)</b>    |                                   |                                |         |           |        |           |                                               |                                         |
| 28S                           | <i>Milax budapestensis</i>        | <i>Deroceras reticulatum</i>   | 0.00989 | 0.01775   | 54.8   | 41.8      | 0.26950                                       | -0.58486                                |
|                               | <i>Arion ater</i>                 | <i>Arion hortensis</i>         | 0.00308 | 0.00465   | 122.5  | 27.4      | 1.49787                                       | -0.41194                                |
|                               | <i>Rumina decollata</i>           | <i>Subulina striatella</i>     | 0.01391 | 0.02188   | 27.8   | 19.6      | 0.34787                                       | -0.45296                                |
|                               | <i>Aplysia punctata</i>           | <i>Acteon tornatilis</i>       | 0.07125 | 0.26992   | 300.0  | 25.0      | 2.48491                                       | -1.33193                                |
|                               | <i>Trichia striolata</i>          | <i>Trichia hispidae</i>        | 0.00000 | 0.00380   | 110.3  | 42.4      | 0.95551                                       |                                         |
|                               | <i>Chilostoma cingulatum</i>      | <i>Chilostoma glaciale</i>     | 0.00285 | 0.01136   | 254.6  | 96.0      | 0.97518                                       | -1.38278                                |
|                               | <i>Helix pomatia</i>              | <i>Theba pisana</i>            | 0.00743 | 0.02628   | 1549.2 | 232.4     | 1.89712                                       | -1.26328                                |
|                               | <i>Cochlicopa lubrica</i>         | <i>Lauria cylindracea</i>      | 0.02307 | 0.02316   | 16.2   | 6.5       | 0.90437                                       | -0.00389                                |
|                               | <i>Vallonia costata</i>           | <i>Vallonia eccentrica</i>     | 0.00170 | 0.00348   | 3.0    | 2.2       | 0.32474                                       | -0.71640                                |
|                               | <i>Cochlodina laminata</i>        | <i>Azeca goodalli</i>          | 0.02225 | 0.03716   | 63.9   | 15.3      | 1.43025                                       | -0.51289                                |
|                               | <i>Macrogaster rolphii</i>        | <i>Clausilia bidentata</i>     | 0.00721 | 0.01365   | 43.4   | 25.9      | 0.51668                                       | -0.63827                                |
|                               | <i>Geomachus maculosus</i>        | <i>Arion silvaticus</i>        | 0.03008 | 0.00511   | 73.5   | 34.6      | 0.75204                                       | 1.77266                                 |
|                               | <i>Lymnaea stagnalis</i>          | <i>Physa fontinalis</i>        | 0.06939 | 0.00000   | 1250.0 | 80.5      | 2.74266                                       |                                         |
|                               | <i>Hygromia cinctella</i>         | <i>Discus rotundus</i>         | 0.05087 | 0.02423   | 71.0   | 17.0      | 1.42980                                       | 0.74168                                 |
|                               | <i>Cepaea nemoralis</i>           | <i>Monacha cartusiana</i>      | 0.02197 | 0.01268   | 344.7  | 95.8      | 1.28021                                       | 0.54965                                 |
|                               | <i>Perforatella incarnata</i>     | <i>Perforatella bidentata</i>  | 0.00715 | 0.00591   | 143.5  | 88.7      | 0.48060                                       | 0.19047                                 |
|                               | <i>Vitrina pellucida</i>          | <i>Vitrea crystallina</i>      | 0.01759 | 0.01020   | 15.6   | 5.3       | 1.07053                                       | 0.54494                                 |
|                               | <i>Oxychilus cellarius</i>        | <i>Oxychilus alliaris</i>      | 0.02115 | 0.00321   | 52.0   | 18.4      | 1.04065                                       | 1.88537                                 |
|                               | <i>Phytia myosotis</i>            | <i>Carychium tridentatum</i>   | 0.04853 | 0.02941   | 22.5   | 1.6       | 2.63507                                       | 0.50085                                 |
|                               | <i>Viviparus viviparus</i>        | <i>Lacuna pallidula</i>        | 0.14239 | 0.05894   | 901.7  | 36.0      | 3.22080                                       | 0.88205                                 |
| <i>Calliostoma zizyphinum</i> | <i>Gibbula cineraria</i>          | 0.07033                        | 0.00000 | 900.0     | 240.0  | 1.32176   |                                               |                                         |
| <i>Littorina littorea</i>     | <i>Littorina obtusata</i>         | 0.10716                        | 0.00296 | 1120.0    | 255.0  | 1.47982   | 3.58913                                       |                                         |
| <i>Buccinum undatum</i>       | <i>Ocenebra erinacea</i>          | 0.10219                        | 0.02948 | 7480.0    | 1250.0 | 1.78909   | 1.24312                                       |                                         |
| COI                           | <i>Deroceras reticulatum</i>      | <i>Deroceras laeve</i>         | 0.14880 | 0.33814   | 45.8   | 19.4      | 0.86138                                       | -0.82086                                |
|                               | <i>Aplysia punctata</i>           | <i>Philine aperta</i>          | 0.22247 | 0.39378   | 300.0  | 70.0      | 1.45529                                       | -0.57100                                |
|                               | <i>Arion subfuscus</i>            | <i>Arion circumscriptus</i>    | 0.50045 | 0.57015   | 59.2   | 34.6      | 0.53522                                       | -0.13039                                |
|                               | <i>Helix aspersa</i>              | <i>Cepaea nemoralis</i>        | 0.41769 | 0.87888   | 1060.7 | 439.9     | 0.88004                                       | -0.74391                                |



| Data set             | Big species                     | Little species                 | BL big  | BL little | BS big  | BS little | ln (BS <sub>Big</sub> /BS <sub>Little</sub> ) | ln ( $\lambda_{Big}/\lambda_{Little}$ ) |
|----------------------|---------------------------------|--------------------------------|---------|-----------|---------|-----------|-----------------------------------------------|-----------------------------------------|
|                      | <i>Arianta arbustorum</i>       | <i>Perforatella incarnata</i>  | 0.56038 | 0.79144   | 487.4   | 143.5     | 1.22284                                       | -0.34524                                |
|                      | <i>Capulus ungaricus</i>        | <i>Calyptraea chinensis</i>    | 0.09417 | 0.44070   | 1000.0  | 75.0      | 2.59027                                       | -1.54326                                |
|                      | <i>Rumina decollata</i>         | <i>Onchidella celtica</i>      | 0.44111 | 0.36771   | 27.8    | 12.0      | 0.83829                                       | 0.18200                                 |
|                      | <i>Helicella itala</i>          | <i>Trochoidea geyeri</i>       | 0.61098 | 0.42647   | 116.2   | 26.5      | 1.47968                                       | 0.35952                                 |
|                      | <i>Littorina littorea</i>       | <i>Littorina obtusata</i>      | 0.11304 | 0.10989   | 800.0   | 255.0     | 1.14335                                       | 0.02826                                 |
|                      | <i>Diodora graeca</i>           | <i>Theodoxus fluviatilis</i>   | 0.78920 | 0.33086   | 400.0   | 66.0      | 1.80181                                       | 0.86932                                 |
|                      | <i>Bithynia tentaculata</i>     | <i>Melarhappe neritoides</i>   | 0.37416 | 0.31005   | 90.8    | 45.0      | 0.70150                                       | 0.18795                                 |
|                      | <i>Hydrobia ulvae</i>           | <i>Hydrobia acuta</i>          | 0.14247 | 0.10158   | 18.0    | 6.0       | 1.09861                                       | 0.33828                                 |
|                      | <i>Neptunea antiqua</i>         | <i>Nucella lapillus</i>        | 0.29336 | 0.27637   | 10000.0 | 924.0     | 2.38163                                       | 0.05966                                 |
| <b>Echinodermata</b> |                                 |                                |         |           |         |           |                                               |                                         |
| <b>18S</b>           | <i>Acrocnida brachiata</i>      | <i>Amphipholis squamata</i>    | 0.01107 | 0.01499   | 12.0    | 5.0       | 0.87547                                       | 0.30314                                 |
|                      | <i>Amphiura chiajei</i>         | <i>Amphiura filiformis</i>     | 0.00000 | 0.00099   | 11.0    | 10.0      | 0.09531                                       |                                         |
|                      | <i>Ophiocomina nigra</i>        | <i>Ophiocoma wendtii</i>       | 0.00000 | 0.01243   | 25.0    | 5.5       | 1.51828                                       |                                         |
|                      | <i>Paracentrotus lividus</i>    | <i>Psammechinus miliaris</i>   | 0.00217 | 0.00232   | 70.0    | 50.0      | 0.33647                                       | -0.06684                                |
|                      | <i>Sphaerechinus granularis</i> | <i>Lytechinus variegatus</i>   | 0.00000 | 0.04260   | 130.0   | 85.0      | 0.42488                                       |                                         |
|                      | <i>Bohadschia vitiensis</i>     | <i>Holothuria edulis</i>       | 0.00253 | 0.00443   | 320.0   | 200.0     | 0.47000                                       | -0.56018                                |
|                      | <i>Leptosynapta inhaerens</i>   | <i>Actinopyga miliaris</i>     | 0.05875 | 0.08524   | 300.0   | 250.0     | 0.18232                                       | -0.37218                                |
|                      | <i>Asterias amurensis</i>       | <i>Aphelasterias japonica</i>  | 0.00884 | 0.00070   | 300.0   | 240.0     | 0.22314                                       | 2.53596                                 |
|                      | <i>Echinaster sepositus</i>     | <i>Porania pulvillus</i>       | 0.08240 | 0.00352   | 200.0   | 120.0     | 0.51083                                       | 3.15312                                 |
|                      | <i>Dermasterias imbricata</i>   | <i>Asterina gibbosa</i>        | 0.00388 | 0.00342   | 200.0   | 50.0      | 1.38629                                       | 0.12619                                 |
|                      | <i>Echinocardium cordatum</i>   | <i>Brissopsis lyrifera</i>     | 0.00557 | 0.00444   | 90.0    | 70.0      | 0.25131                                       | 0.22674                                 |
|                      | <i>Neopentadactyla mixta</i>    | <i>Cucumaria elongata</i>      | 0.02235 | 0.01114   | 250.0   | 150.0     | 0.51083                                       | 0.69628                                 |
| <b>28S</b>           | <i>Florometra serratissima</i>  | <i>Antedon bifida</i>          | 0.00000 | 0.01839   | 141.4   | 70.7      | 0.69315                                       |                                         |
|                      | <i>Crossaster papposus</i>      | <i>Asterina gibbosa</i>        | 0.00000 | 0.00368   | 350.0   | 50.0      | 1.94591                                       |                                         |
|                      | <i>Marthasterias glacialis</i>  | <i>Asterias rubens</i>         | 0.00000 | 0.02231   | 700.0   | 500.0     | 0.33647                                       |                                         |
|                      | <i>Ophiocomina nigra</i>        | <i>Amphipholis squamata</i>    | 0.01077 | 0.08153   | 25.0    | 5.0       | 1.60944                                       | -2.02421                                |
|                      | <i>Sphaerechinus granularis</i> | <i>Lytechinus variegatus</i>   | 0.00000 | 0.00369   | 130.0   | 85.0      | 0.42488                                       |                                         |
|                      | <i>Spatangus purpureus</i>      | <i>Echinocardium cordatum</i>  | 0.00000 | 0.00357   | 120.0   | 90.0      | 0.28768                                       |                                         |
|                      | <i>Leptosynapta inhaerens</i>   | <i>Holothuria forskali</i>     | 0.05339 | 0.06733   | 300.0   | 200.0     | 0.40547                                       | -0.23198                                |
|                      | <i>Echinus esculentus</i>       | <i>Psammechinus miliaris</i>   | 0.01379 | 0.01768   | 180.0   | 50.0      | 1.28093                                       | -0.24849                                |
|                      | <i>Luidia ciliaris</i>          | <i>Astropecten irregularis</i> | 0.01281 | 0.01058   | 600.0   | 200.0     | 1.09861                                       | 0.19126                                 |
|                      | <i>Ophiura ophiura</i>          | <i>Ophiura albida</i>          | 0.00560 | 0.00352   | 35.0    | 12.0      | 1.07044                                       | 0.46431                                 |

| Data set                    | Big species                          | Little species                   | BL big  | BL little | BS big  | BS little | ln (BS <sub>Big</sub> /BS <sub>Little</sub> ) | ln ( $\lambda_{Big}/\lambda_{Little}$ ) |
|-----------------------------|--------------------------------------|----------------------------------|---------|-----------|---------|-----------|-----------------------------------------------|-----------------------------------------|
|                             | <i>Strongylocentrotus purpuratus</i> | <i>Arbacia lixula</i>            | 0.00660 | 0.00000   | 100.0   | 50.0      | 0.69315                                       |                                         |
| <b>Platyhelminthes (13)</b> |                                      |                                  |         |           |         |           |                                               |                                         |
| <b>18S</b>                  | <i>Echinostoma revolutum</i>         | <i>Echinostoma caproni</i>       | 0.00068 | 0.00138   | 18.2    | 5.7       | 1.17141                                       | -0.70775                                |
|                             | <i>Diphyllobothrium latum</i>        | <i>Schistocephalus solidus</i>   | 0.00000 | 0.00462   | 25000.0 | 165.0     | 5.02069                                       |                                         |
|                             | <i>Taenia solium</i>                 | <i>Taenia crassiceps</i>         | 0.00000 | 0.01053   | 4500.0  | 140.0     | 3.47019                                       |                                         |
|                             | <i>Hymenolepis microstoma</i>        | <i>Echinococcus granulosus</i>   | 0.02881 | 0.05397   | 80.0    | 5.0       | 2.77259                                       | -0.62771                                |
|                             | <i>Triaenophorus nodulus</i>         | <i>Dendrocoelum lacteum</i>      | 0.04809 | 0.26554   | 240.0   | 19.5      | 2.51022                                       | -1.70869                                |
|                             | <i>Polycelis tenuis</i>              | <i>Polycelis nigra</i>           | 0.00000 | 0.00144   | 10.0    | 9.8       | 0.02532                                       |                                         |
|                             | <i>Fasciola hepatica</i>             | <i>Clonorchis sinensis</i>       | 0.02151 | 0.01655   | 25.0    | 15.0      | 0.51083                                       | 0.26213                                 |
|                             | <i>Schistosoma japonicum</i>         | <i>Schistosoma mansoni</i>       | 0.01089 | 0.00449   | 20.0    | 10.0      | 0.69315                                       | 0.88599                                 |
|                             | <i>Schistosoma intercalatum</i>      | <i>Schistosoma haematobium</i>   | 0.00140 | 0.00068   | 20.5    | 20.0      | 0.02469                                       | 0.72213                                 |
|                             | <i>Schistosomatium douthitti</i>     | <i>Clinostomum complanatum</i>   | 0.02910 | 0.02466   | 7.4     | 5.5       | 0.28995                                       | 0.16556                                 |
|                             | <i>Hymenolepis diminuta</i>          | <i>Hymenolepis nana</i>          | 0.01185 | 0.01086   | 950.0   | 30.0      | 3.45526                                       | 0.08724                                 |
| <b>COI</b>                  |                                      | <i>Schistosomatium douthitti</i> |         |           |         |           |                                               |                                         |
|                             | <i>Schistosoma japonicum</i>         | <i>Schistosoma douthitti</i>     | 0.09400 | 0.40530   | 20.0    | 7.4       | 1.00103                                       | -1.46133                                |
|                             | <i>Schistosoma intercalatum</i>      | <i>Schistosoma mansoni</i>       | 0.15260 | 0.16024   | 20.5    | 10.0      | 0.71784                                       | -0.04885                                |
|                             | <i>Taenia saginata</i>               | <i>Taenia solium</i>             | 0.09214 | 0.11441   | 10500.0 | 4500.0    | 0.84730                                       | -0.21648                                |
|                             | <i>Dendrocoelum lacteum</i>          | <i>Polycelis tenuis</i>          | 0.12802 | 0.13332   | 19.5    | 10.0      | 0.66783                                       | -0.04057                                |
|                             | <i>Fasciola hepatica</i>             | <i>Echinostoma caproni</i>       | 0.14032 | 0.13349   | 25.0    | 5.7       | 1.48722                                       | 0.04990                                 |
|                             | <i>Clonorchis sinensis</i>           | <i>Apatemon gracilis</i>         | 1.21059 | 0.83641   | 15.0    | 0.7       | 3.02098                                       | 0.36974                                 |
|                             | <i>Diphyllobothrium latum</i>        | <i>Echinococcus granulosus</i>   | 0.17936 | 0.11031   | 25000.0 | 5.0       | 8.51719                                       | 0.48610                                 |
|                             | <i>Ligula intestinalis</i>           | <i>Schistocephalus solidus</i>   | 0.32002 | 0.16251   | 550.0   | 165.0     | 1.20397                                       | 0.67764                                 |
|                             | <i>Hymenolepis diminuta</i>          | <i>Hymenolepis nana</i>          | 0.21286 | 0.16999   | 950.0   | 30.0      | 3.45526                                       | 0.22490                                 |
| <b>Hymenoptera (14)</b>     |                                      |                                  |         |           |         |           |                                               |                                         |
| <b>28S</b>                  | Gasteruptidae                        | Ceraphronidae                    | 0.04176 | 0.12199   | 28.0    | 1.6       | 2.87406                                       | -1.07200                                |
|                             | Chrysididae                          | Dryinidae                        | 0.01203 | 0.03996   | 7.1     | 3.9       | 0.60199                                       | -1.20048                                |
|                             | Ibaliidae                            | Figitidae                        | 0.01004 | 0.07590   | 14.1    | 2.7       | 1.64171                                       | -2.02284                                |
|                             | Pelecniidae                          | Roproniidae                      | 0.03799 | 0.07627   | 42.4    | 8.9       | 1.55676                                       | -0.69696                                |
|                             | Pteromalidae                         | Mymaridae                        | 0.00877 | 0.18079   | 2.0     | 0.6       | 1.15129                                       | -3.02600                                |

| Data set                | Big species    | Little species | BL big  | BL little | BS big | BS little | ln (BS <sub>Big</sub> /BS <sub>Little</sub> ) | ln ( $\lambda_{Big}/\lambda_{Little}$ ) |
|-------------------------|----------------|----------------|---------|-----------|--------|-----------|-----------------------------------------------|-----------------------------------------|
|                         | Scoliidae      | Mutillidae     | 0.07012 | 0.02173   | 21.9   | 9.5       | 0.83699                                       | 1.17151                                 |
|                         | Chalcididae    | Torymidae      | 0.06599 | 0.04730   | 4.9    | 2.5       | 0.69315                                       | 0.33299                                 |
|                         | Perilampidae   | Aphelinidae    | 0.06606 | 0.03786   | 3.2    | 0.9       | 1.24245                                       | 0.55667                                 |
|                         | Eucharitidae   | Eulophidae     | 0.18259 | 0.04044   | 5.5    | 5.0       | 0.09116                                       | 1.50742                                 |
|                         | Proctotrupidae | Vanhorniidae   | 0.16832 | 0.02869   | 6.9    | 6.0       | 0.14384                                       | 1.76932                                 |
|                         | Monomachidae   | Heloridae      | 0.15246 | 0.04727   | 12.4   | 7.0       | 0.57257                                       | -1.17103                                |
|                         |                |                |         |           |        |           |                                               |                                         |
| <b>COI</b>              | Stephanidae    | Ceraphronidae  | 0.17350 | 0.26085   | 12.7   | 1.6       | 2.07944                                       | -0.40777                                |
|                         | Pelecniidae    | Heloridae      | 0.14390 | 0.32516   | 42.4   | 7.0       | 1.80186                                       | -0.81520                                |
|                         | Monomachidae   | Diapriidae     | 0.17850 | 0.10724   | 12.4   | 6.7       | 0.61515                                       | 0.50952                                 |
|                         | Pteromalidae   | Mymaridae      | 0.14499 | 0.10313   | 2.0    | 0.6       | 1.15129                                       | 0.34067                                 |
|                         | Leucospidae    | Torymidae      | 0.15426 | 0.07936   | 5.7    | 2.5       | 0.83699                                       | 0.66465                                 |
|                         | Chalcididae    | Aphelinidae    | 0.15690 | 0.05288   | 4.9    | 0.9       | 1.65579                                       | 1.08758                                 |
|                         | Vanhorniidae   | Platygastridae | 0.28693 | 0.21908   | 6.0    | 1.6       | 1.33361                                       | 0.26980                                 |
|                         | Ibaliidae      | Figitidae      | 0.16144 | 0.12589   | 14.1   | 2.7       | 1.64171                                       | 0.24873                                 |
| <b>Annelida (15-17)</b> |                |                |         |           |        |           |                                               |                                         |
| <b>18S</b>              | Opheliidae     | Syllidae       | 0.02346 | 0.13844   | 50.0   | 20.0      | 0.91629                                       | -1.77514                                |
|                         | Sabellidae     | Serpulidae     | 0.03062 | 0.22814   | 75.0   | 22.0      | 1.22645                                       | -2.00831                                |
|                         | Chaetopteridae | Oweniidae      | 0.02183 | 0.07750   | 217.0  | 27.0      | 2.08406                                       | -1.26699                                |
|                         | Lumbrineridae  | Dorvilleidae   | 0.01695 | 0.12346   | 109.0  | 13.0      | 2.12640                                       | -1.98565                                |
|                         | Onuphidae      | Eunicidae      | 0.01891 | 0.03903   | 193.0  | 118.0     | 0.49201                                       | -0.72464                                |
|                         | Glyceridae     | Phyllodocidae  | 0.01675 | 0.03852   | 295.0  | 74.0      | 1.38291                                       | -0.83278                                |
|                         | Nephtyidae     | Nereididae     | 0.04311 | 0.16363   | 161.0  | 117.0     | 0.31923                                       | -1.33385                                |
|                         | Arenicolidae   | Maldanidae     | 0.09009 | 0.06118   | 107.0  | 51.0      | 0.74100                                       | 0.38699                                 |
|                         | Terebellidae   | Ampharetidae   | 0.07688 | 0.03604   | 151.0  | 30.0      | 1.61608                                       | 0.75762                                 |
|                         | Pectinariidae  | Protodrilidae  | 0.25079 | 0.10071   | 128.0  | 7.0       | 1.38629                                       | 0.91237                                 |
|                         | Polynoidae     | Sigalionidae   | 0.03600 | 0.01097   | 64.0   | 13.0      | 1.59393                                       | 1.18835                                 |
| <b>H3</b>               | Sabellariidae  | Serpulidae     | 0.06007 | 0.19332   | 25.0   | 22.0      | 0.12783                                       | -1.16884                                |
|                         | Polynoidae     | Sigalionidae   | 0.03543 | 0.04967   | 64.0   | 13.0      | 1.59393                                       | -0.33784                                |
|                         | Chaetopteridae | Oweniidae      | 0.06897 | 0.12203   | 217.0  | 27.0      | 2.08406                                       | -0.57060                                |
|                         | Nephtyidae     | Phyllodocidae  | 0.02524 | 0.14506   | 161.0  | 74.0      | 0.77734                                       | -1.74872                                |
|                         | Terebellidae   | Pectinariidae  | 0.06880 | 0.10143   | 151.0  | 28.0      | 1.68508                                       | -0.38817                                |
|                         | Lumbricidae    | Cirratulidae   | 0.16969 | 0.06937   | 219.0  | 35.0      | 1.83372                                       | 0.89452                                 |
|                         | Nereidae       | Spionidae      | 0.04656 | 0.15852   | 117.0  | 109.0     | 0.07083                                       | -1.22514                                |

| Data set             | Big species     | Little species         | BL big  | BL little | BS big  | BS little | ln (BS <sub>Big</sub> /BS <sub>Little</sub> ) | ln ( $\lambda_{Big}/\lambda_{Little}$ ) |
|----------------------|-----------------|------------------------|---------|-----------|---------|-----------|-----------------------------------------------|-----------------------------------------|
|                      | Maldanidae      | Opheliidae             | 0.05083 | 0.04254   | 51.0    | 50.0      | 0.01980                                       | 0.17804                                 |
| <b>Bivalvia (18)</b> |                 |                        |         |           |         |           |                                               |                                         |
| <b>18S</b>           | Arcidae         | Noetiidae              | 0.00060 | 0.00148   | 2163.6  | 1261.4    | 0.53952                                       | -0.90287                                |
|                      | Cardiidae       | Chamidae               | 0.12035 | 0.34775   | 3541.5  | 2712.7    | 0.26660                                       | -1.06108                                |
|                      | Glycymerididae  | Limopsidae             | 0.00551 | 0.00594   | 2098.1  | 515.3     | 1.40401                                       | -0.07514                                |
|                      | Lyonsiidae      | Cuspidariidae          | 0.01326 | 0.06972   | 1872.0  | 140.2     | 2.59155                                       | -1.65974                                |
|                      | Pinnidae        | Limidae                | 0.01854 | 0.05492   | 26684.4 | 535.9     | 3.90785                                       | -1.08595                                |
|                      | Pteriidae       | Isognomonidae          | 0.00915 | 0.01168   | 19754.0 | 3337.5    | 1.77813                                       | -0.24412                                |
|                      | Gastrochaenidae | Teredinidae            | 0.06417 | 0.05439   | 322.0   | 70.2      | 1.52320                                       | 0.16536                                 |
|                      | Matricidae      | Corbiculidae           | 0.02807 | 0.01297   | 5401.2  | 1897.4    | 1.04612                                       | 0.77206                                 |
|                      | Myidae          | Corbulidae             | 0.00788 | 0.00351   | 4085.0  | 192.03    | 3.05743                                       | 0.80871                                 |
|                      | Ostreoidae      | Anomidae               | 0.15037 | 0.02058   | 12183.7 | 3616.6    | 1.21457                                       | 1.98878                                 |
|                      | Sareptidae      | Nuculidae              | 0.05118 | 0.00677   | 569.6   | 54.7      | 2.34271                                       | 2.02285                                 |
|                      | Spondylidae     | Pectinidae             | 0.01926 | 0.01342   | 20807.7 | 3232.2    | 1.86218                                       | 0.36128                                 |
| Tellinidae           | Donacidae       | 0.03662                | 0.0115  | 1113.6    | 886.1   | 0.22855   | 1.15825                                       |                                         |
| <b>28S</b>           | Sareptidae      | Nuculidae              | 0.02619 | 0.06352   | 569.6   | 54.7      | 2.34271                                       | -0.88598                                |
|                      | Limopsidae      | Philobryidae           | 0.00366 | 0.02413   | 515.3   | 52.0      | 2.29352                                       | -1.88599                                |
|                      | Pinnidae        | Limidae                | 0.01731 | 0.03599   | 26684.4 | 535.9     | 3.90785                                       | -0.73196                                |
|                      | Spondylidae     | Pectinidae             | 0.02098 | 0.02204   | 20807.7 | 3232.2    | 1.86218                                       | -0.04929                                |
|                      | Tellinidae      | Donacidae              | 0.02648 | 0.11554   | 1113.6  | 886.1     | 0.22855                                       | -1.47323                                |
|                      | Myidae          | Corbulidae             | 0.00000 | 0.05075   | 4085.0  | 192.0     | 3.05743                                       |                                         |
|                      | Arcidae         | Noetiidae              | 0.04029 | 0.00232   | 2163.6  | 1261.4    | 0.53952                                       | 2.85454                                 |
|                      | Pteriidae       | Isognomonidae          | 0.07545 | 0.03674   | 19754.0 | 3337.5    | 1.77813                                       | 0.71960                                 |
|                      | Chamidae        | Lucinidae              | 0.55062 | 0.33341   | 2712.7  | 834.8     | 1.17856                                       | 0.50167                                 |
|                      | Matricidae      | Corbiculidae           | 0.07735 | 0.03622   | 5401.2  | 1897.4    | 1.04612                                       | 0.75873                                 |
|                      | Galeommatidae   | Lasaeidae (Erycinidae) | 0.02819 | 0.00548   | 74.0    | 9.0       | 2.10684                                       | 1.63786                                 |
|                      | Gastrochaenidae | Teredinidae            | 0.15893 | 0.02014   | 322.0   | 70.2      | 1.52320                                       | 2.06576                                 |
| <b>COI</b>           | Myidae          | Corbulidae             | 0.30938 | 0.33050   | 4085.0  | 192.1     | 3.05743                                       | -0.06604                                |
|                      | Arcidae         | Noetiidae              | 0.35145 | 0.45308   | 2163.6  | 1261.4    | 0.53952                                       | -0.25400                                |
|                      | Pinnidae        | Ostreoidae             | 0.37051 | 0.51054   | 26684.4 | 12183.7   | 0.78398                                       | -0.32059                                |
|                      | Spondylidae     | Pectinidae             | 0.34795 | 0.49959   | 20807.7 | 3232.2    | 1.86218                                       | -0.36173                                |
|                      | Pteriidae       | Isognomonidae          | 0.25074 | 0.47778   | 19754.0 | 3337.5    | 1.77813                                       | -0.64473                                |
|                      | Limopsidae      | Philobryidae           | 0.14087 | 0.42147   | 515.3   | 52.0      | 2.29352                                       | -1.09591                                |
|                      | Tellinidae      | Donacidae              | 0.13982 | 0.07255   | 1113.6  | 886.1     | 0.22855                                       | 0.65608                                 |

| Data set                 | Big species         | Little species     | BL big  | BL little | BS big | BS little | ln (BS <sub>Big</sub> /BS <sub>Little</sub> ) | ln ( $\lambda_{Big}/\lambda_{Little}$ ) |
|--------------------------|---------------------|--------------------|---------|-----------|--------|-----------|-----------------------------------------------|-----------------------------------------|
|                          | Cardiidae           | Lucinidae          | 0.66028 | 0.49433   | 3541.5 | 834.8     | 1.44516                                       | 0.28946                                 |
|                          | Matricidae          | Corbiculidae       | 0.36885 | 0.20243   | 5401.2 | 1897.4    | 1.04612                                       | 0.60000                                 |
|                          | Lyonsiidae          | Cuspidariidae      | 0.85616 | 0.58970   | 1872.0 | 140.2     | 2.59155                                       | 0.37284                                 |
| <b>Monogenea (19-21)</b> |                     |                    |         |           |        |           |                                               |                                         |
| <b>18S</b>               | Dactylogyridae      | Diplectanidae      | 0.15216 | 0.07255   | 0.9    | 0.7       | 0.26663                                       | 0.74066                                 |
|                          | Tetraonchidae       | Gyrodactylidae     | 0.14734 | 0.16449   | 1.2    | 0.8       | 0.41804                                       | -0.11011                                |
|                          | Capsalidae          | Monocotylidae      | 0.19721 | 0.05826   | 7.2    | 3.9       | 0.61825                                       | 1.21935                                 |
|                          | Polystomatidae      | Sphyranuridae      | 0.03747 | 0.11447   | 3.9    | 2.6       | 0.40547                                       | -1.11677                                |
|                          | Hexabothriidae      | Mazocraeidae       | 0.05497 | 0.04384   | 6.5    | 4.1       | 0.45928                                       | 0.22624                                 |
|                          | Neothoracocotylidae | Gotocotylidae      | 0.01375 | 0.00879   | 12.0   | 6.2       | 0.65393                                       | 0.44742                                 |
|                          | Diclidophoridae     | Plectanocotylidae  | 0.05030 | 0.03034   | 5.7    | 3.5       | 0.48946                                       | 0.50554                                 |
| <b>28S</b>               | Diclidophoridae     | Discocotylidae     | 0.09619 | 0.05538   | 5.7    | 4.5       | 0.23150                                       | 0.55211                                 |
|                          | Hexastomatidae      | Plectanocotylidae  | 0.01482 | 0.15249   | 10.6   | 3.5       | 1.10715                                       | -2.33112                                |
|                          | Heteraxinidae       | Axinidae           | 0.06486 | 0.01252   | 5.0    | 4.2       | 0.16182                                       | 1.64490                                 |
|                          | Hexabothriidae      | Polystomatidae     | 0.16714 | 0.30938   | 6.5    | 3.9       | 0.50929                                       | -0.61574                                |
|                          | Bothitrematidae     | Diplectanidae      | 0.28911 | 0.35295   | 2.0    | 0.7       | 0.99633                                       | -0.19952                                |
|                          | Capsilidae          | Gyrodactylidae     | 0.39660 | 0.47829   | 7.2    | 0.8       | 2.20980                                       | -0.18729                                |
|                          | Neothoracocotylidae | Allodiscocotylidae | 0.05217 | 0.07129   | 12.0   | 2.1       | 1.76707                                       | -0.31225                                |

## References

1. Caterino, M. S., Reed, R. D., Kuo, M. M. & Sperling, F. A. H. (2001) *Syst. Biol.* **50**, 106-127.
2. Caterino, M. S. & Sperling, F. A. H. (1999) *Mol. Phylogenet. Evol.* **42**, 384-397.
3. Brower, A. V. Z. (2000) *Proc. R. Soc. London B* **267**, 1201-1211.
4. Brower, A. V. Z. & Egan, M. G. (1997) *Proc. R. Soc. London B* **264**, 969-977.
5. Zakharov, E. V., Caterino, M. S. & Sperling, F. A. H. (2004) *Syst. Biol.* **53**, 193-215.
6. Pech, P., Fric, Z., Konvicka, M. & Zrzavy, J. (2004) *Cladistics* **20**, 362-375.
7. Omoto, K., Katoh, T., Chichvarkhin, A. & Yagi, T. (1999) *J. Mol. Evol.* **326**, 141-147.
8. Yagi, T., Sasaki, G. & Takebe, H. (1999) *J. Mol. Evol.* **48**, 42-48.
9. Maddison, W. P. & Hedin, M. C. (2003) *Invertebr. Syst.* **17**, 529-549.
10. Wood, J. B. & Day, C. L. (2006) *CephBase*, <http://www.cephbase.utmb.edu/>.
11. Ponder, W. F. & Lindberg, D. R. (1997) *Zool. J. Linn. Soc.* **119**, 83-265.
12. Wade, C. M., Clarke, B. & Mordan, P. B. (2001) *Proc. R. Soc. London. B* **268**, 1471-2954.
13. Trouve, S., Sasal, P., Jourdane, J., Renaud, F. & Morand, S. (1998) *Oecologia* **115**, 370-378.

14. Downton, M. & Austin, A. D. (2001) *Biol. J. Linn. Soc.* **74**, 87-111.
15. Bleidorn, C., Vogt, L. & Bartolomaeus, T. (2003) *Mol. Phylogenet. Evol.* **29**, 279-288.
16. Rouse, G. W. & Pleijel, F. (2003) *Hydrobiologia* **496**, 175-189.
17. Brown, S., G. Rouse, Hutchings, P. Colgan, D. (1999) *Australian J. Zool.* **47**, 499-516.
18. <http://www.palaeos.com/Invertebrates/Molluscs/Bivalvia/cladogram.html>.
19. Boeger, W. A. & Kritsky, D. C. (1993) *Syst. Parasit.* **26**, 1-32.
20. Olson, P. D. & Littlewood, D. T. J. (2002) *Int. J. Parasit.* **32**, 233-244.
21. Verneau, O., Bentz, S., Sinnappah, N. D., du Preez, L., Whittington, I. & Combes, C. (2002) *Proc. R. Soc. London B* **269**, 535-543.
