# Supplementary material
Source: PubMed Central journal article supplement (PMC1464347)
Supplement: pnas_0510251103_7.pdf [file pnas_0510251103_7.pdf]

**Appendix 6.** Body size data and GenBank accession numbers for species used in analysis. References in parentheses show sources of body size data; an asterisk indicates references included other life history data measurements along with body size (see text). Table includes body size data for both species and family level comparisons (body size averages for families are indicated in parentheses). For family level comparisons, wherever possible, the same representative species was chosen for all genes. However, different species were chosen when sequence data was unavailable (e.g. see Aphelinidae). For gene abbreviations see *Materials and Methods*. For the Lepidoptera, COI accession numbers also contained COII sequences.

| PHYLUM/Class/Order | Family         | Species Name                    | Size, mm                     | Ref. | Accession Nos. |     |     |          |    |     |
|--------------------|----------------|---------------------------------|------------------------------|------|----------------|-----|-----|----------|----|-----|
|                    |                |                                 |                              |      | 28S            | 16S | 18S | COI      | H3 | ND5 |
| ARTHROPODA         |                |                                 |                              |      |                |     |     |          |    |     |
| Insecta            |                |                                 | Body length (family average) |      |                |     |     |          |    |     |
| Hymenoptera        | Aphelinidae    | <i>Encarsia tricolor</i>        | 0.35-2.5                     | (1)  | AJ305302       |     |     |          |    |     |
|                    |                | <i>Aphytis melinus</i>          |                              |      |                |     |     | AF379971 |    |     |
|                    | Ceraphronidae  | <i>Ceraphron sp.</i>            | 0.5-5                        | (1)  | AF379901       |     |     | AF379970 |    |     |
|                    | Chalcididae    | <i>Brachymeria sp.</i>          | 2-12                         | (1)  |                |     |     |          |    |     |
|                    |                | <i>Brachymeria phyta</i>        |                              |      |                |     |     | AF379972 |    |     |
|                    | Chrysididae    | <i>Chrysis sp.</i>              | 2.5-20                       | (1)  | AF142520       |     |     | AF142532 |    |     |
|                    | Diapriidae     | <i>Basalys sp.</i>              | 3-15                         | (1)  |                |     |     |          |    |     |
|                    |                | <i>Spilomicrus sp.</i>          |                              |      |                |     |     | AF380011 |    |     |
|                    | Dryinidae      | <i>Lonchodryinus suticornis</i> | 1.5-10                       | (1)  | AJ302907       |     |     |          |    |     |
|                    | Eucharitidae   | <i>Laurella guriana</i>         | 3-10                         | (1)  | AY55224<br>2   |     |     |          |    |     |
|                    | Eulophidae     | <i>Melittobia australica</i>    | <5                           | (1)  | AF379906       |     |     | AF379974 |    |     |
|                    | Figitidae      | <i>Anacharis zealandica</i>     | 1.5-5                        | (1)  | AF379913       |     |     | AF379981 |    |     |
|                    | Gasteruptidae  | <i>Eufoenus sp.</i>             | <28                          | (1)  | AF379919       |     |     |          |    |     |
|                    | Heloridae      | <i>Helorus sp.</i>              | 7                            | (1)  | AF379943       |     |     | AF380014 |    |     |
|                    | Ibaliidae      | <i>Ibalia leucospoides</i>      | 8-25                         | (1)  | AF379914       |     |     | AF379982 |    |     |
|                    | Leucospidae    | <i>Leucospis sp.</i>            | 2-16                         | (1)  | AF146663       |     |     | AF142552 |    |     |
|                    | Monomachidae   | <i>Monomachus antipodalis</i>   | 7-22                         | (1)  | AF379945       |     |     |          |    |     |
|                    |                | <i>Monomachus sp.</i>           |                              |      |                |     |     | AF380017 |    |     |
|                    | Mutillidae     | <i>Dasymutilla gloriosa</i>     | 3-30                         | (1)  | U65194         |     |     |          |    |     |
|                    | Mymaridae      | <i>Gonatocerus sp.</i>          | 0.2-2                        | (1)  | AF379908       |     |     | AF379976 |    |     |
|                    | Pelecniidae    | <i>Pelecinius polyturator</i>   | 30-60                        | (1)  | AF379947       |     |     | AF380018 |    |     |
|                    | Perilampidae   | <i>Chrysolampus sysimbrii</i>   | 1.5-7                        | (1)  | AY55218<br>8   |     |     |          |    |     |
|                    | Platygastridae | <i>Inostemma sp.</i>            | 0.5-5                        | (1)  | AF379933       |     |     |          |    |     |
|                    |                | <i>Allotropa sp.</i>            |                              |      |                |     |     | AF380005 |    |     |
|                    | Proctotrupidae | <i>Brachyserphus abruptus</i>   | 6-8                          | (1)  | AF379949       |     |     |          |    |     |
|                    |                | <i>Phaenoserphus viator</i>     |                              |      |                |     |     | AF380022 |    |     |
|                    | Pteromalidae   | <i>Pteromalus puparum</i>       | 1-4                          | (1)  | AF379909       |     |     |          |    |     |
|                    |                | <i>Trichilogaster sp.</i>       |                              |      |                |     |     | AF379978 |    |     |
|                    | Roproniidae    | <i>Ropronia garmani</i>         | 8-10                         | (1)  | AF379953       |     |     | AF380023 |    |     |
|                    | Scoliidae      | <i>Scolia sp.</i>               | 8-60                         | (1)  | AF142523       |     |     |          |    |     |
|                    | Stephanidae    | <i>Megischus bicolor</i>        | 4-40                         | (1)  | AF379955       |     |     | AF380025 |    |     |
|                    | Torymidae      | <i>Megastigmus sp.</i>          | 1-6                          | (1)  | AF345594       |     |     | AF420407 |    |     |
|                    | Vanhorniidae   | <i>Vanhornia eunemidarum</i>    | 6                            | (1)  | AF379954       |     |     | AF380024 |    |     |
|                    |                |                                 |                              |      |                |     |     |          |    |     |
|                    |                |                                 | Wing length                  |      |                |     |     |          |    |     |
| Lepidoptera        | Hesperiidae    | <i>Pyrgus communis</i>          | 13.5                         | (2)* |                |     |     | AF170857 |    |     |

| PHYLUM/Class/Order | Family      | Species Name                 | Size, mm | Ref. | Accession Nos. |  |  |              |  |              |
|--------------------|-------------|------------------------------|----------|------|----------------|--|--|--------------|--|--------------|
|                    | Lycaenidae  | <i>Curetis acuta</i>         | 22.8     | (2)* |                |  |  |              |  | AB01316<br>2 |
|                    |             | <i>Zizina otis</i>           | 10.5     | (2)* |                |  |  |              |  | AB17584<br>5 |
|                    |             | <i>Artopoetes pryeri</i>     | 23       | (2)* |                |  |  |              |  | AB17584<br>6 |
|                    |             | <i>Arhopala muta</i>         | 16.5     | (2)* |                |  |  | AY23584<br>1 |  |              |
|                    |             | <i>Celastrina argiolus</i>   | 14.5     | (2)* |                |  |  | AJ505069     |  |              |
|                    |             | <i>Japonica saepestriata</i> | 21       | (2)* |                |  |  | AB01104<br>8 |  |              |
|                    |             | <i>Maculinea alcon</i>       | 17.5     | (2)* |                |  |  | AJ505054     |  |              |
|                    |             | <i>Maculinea arion</i>       | 19.9     | (2)* |                |  |  | AJ505066     |  |              |
|                    |             | <i>Maculinea nausithous</i>  | 16.7     | (2)* |                |  |  | AJ505063     |  |              |
|                    |             | <i>Plebejus argus</i>        | 14       | (2)* |                |  |  | AY49681<br>2 |  |              |
|                    |             | <i>Polyommatus icarus</i>    | 15.2     | (2)* |                |  |  | AY49681<br>7 |  |              |
|                    |             | <i>Polyommatus thersites</i> | 14       | (2)* |                |  |  | AY49681<br>8 |  |              |
|                    |             | <i>Wagimo signatus</i>       | 15.5     | (2)* |                |  |  | AB01104<br>9 |  |              |
|                    | Nymphalidae | <i>Idea leuconoe</i>         | 61       | (2)* |                |  |  |              |  | AB01316<br>5 |
|                    |             | <i>Euploea mulciber</i>      | 51.5     | (2)* |                |  |  |              |  | AB01316<br>6 |
|                    |             | <i>Argyreus hyperbicus</i>   | 39       | (2)* |                |  |  |              |  | AB01316<br>9 |
|                    |             | <i>Lethe diana</i>           | 27       | (2)* |                |  |  |              |  | AB01317<br>0 |
|                    |             | <i>Limenitis populi</i>      | 40       | (2)* |                |  |  | AB10792<br>0 |  | AB10711<br>7 |
|                    |             | <i>Aglais urticae</i>        | 23.8     | (2)* |                |  |  | AB10792<br>7 |  | AB10712<br>2 |
|                    |             | <i>Argynnis paphia</i>       | 33       | (2)* |                |  |  | AY09020<br>0 |  | AB17586<br>8 |
|                    |             | <i>Limenitis camilla</i>     | 28       | (2)* |                |  |  |              |  | AB17587<br>0 |
|                    |             | <i>Minois dryas</i>          | 32.7     | (2)* |                |  |  |              |  | AB17587<br>8 |
|                    |             | <i>Mycalopsis gotama</i>     | 25.5     | (2)* |                |  |  |              |  | AB17588<br>1 |
|                    |             | <i>Acraea encedon</i>        | 29.5     | (2)* |                |  |  | AJ414625     |  | AJ508686     |
|                    |             | <i>Anartia amathea</i>       | 26       | (2)* |                |  |  | AY03866<br>8 |  |              |
|                    |             | <i>Anartia fatima</i>        | 28.5     | (2)* |                |  |  | AY03866<br>7 |  |              |
|                    |             | <i>Anartia jatrophae</i>     | 20       | (2)* |                |  |  | AY03866<br>9 |  |              |

| PHYLUM/Class/Order | Family       | Species Name                  | Size, mm | Ref. | Accession Nos. |  |  |              |  |         |
|--------------------|--------------|-------------------------------|----------|------|----------------|--|--|--------------|--|---------|
|                    |              | <i>Anartia lytrea</i>         | 30.5     | (2)* |                |  |  | AY03866<br>3 |  |         |
|                    |              | <i>Coenonympha tullia</i>     | 18.9     | (2)* |                |  |  | AF170860     |  |         |
|                    |              | <i>Dione glycera</i>          | 35       | (2)* |                |  |  | AF492407     |  |         |
|                    |              | <i>Dione juno</i>             | 38.4     | (2)* |                |  |  | U08548       |  |         |
|                    |              | <i>Dryas julia</i>            | 43.5     | (2)* |                |  |  | U08519       |  |         |
|                    |              | <i>Eueides aliphera</i>       | 30       | (2)* |                |  |  | U08551       |  |         |
|                    |              | <i>Eueides lineata</i>        | 34.5     | (2)* |                |  |  | AF413701     |  |         |
|                    |              | <i>Eueides lybia</i>          | 31.5     | (2)* |                |  |  | U08553       |  |         |
|                    |              | <i>Eueides procula</i>        | 34.5     | (2)* |                |  |  | U08559       |  |         |
|                    |              | <i>Eueides tales</i>          | 35.5     | (2)* |                |  |  | U08517       |  |         |
|                    |              | <i>Eueides vibilia</i>        | 32       | (2)* |                |  |  | AF492408     |  |         |
|                    |              | <i>Heliconius antiochus</i>   | 33       | (2)* |                |  |  | U08552       |  |         |
|                    |              | <i>Heliconius atthis</i>      | 40.5     | (2)* |                |  |  | U08528       |  |         |
|                    |              | <i>Heliconius besckei</i>     | 34.5     | (2)* |                |  |  | U08510       |  |         |
|                    |              | <i>Heliconius burneyi</i>     | 46       | (2)* |                |  |  | U08540       |  |         |
|                    |              | <i>Heliconius charithonia</i> | 40       | (2)* |                |  |  | U08549       |  |         |
|                    |              | <i>Heliconius clysonymus</i>  | 39.5     | (2)* |                |  |  | U08558       |  |         |
|                    |              | <i>Heliconius demeter</i>     | 34.5     | (2)* |                |  |  | U08535       |  |         |
|                    |              | <i>Heliconius egeria</i>      | 46       | (2)* |                |  |  | U08539       |  |         |
|                    |              | <i>Heliconius eleuchia</i>    | 39       | (2)* |                |  |  | AF413697     |  |         |
|                    |              | <i>Heliconius erato</i>       | 40.5     | (2)* |                |  |  | AF413689     |  |         |
|                    |              | <i>Heliconius ethilla</i>     | 42       | (2)* |                |  |  | U08508       |  |         |
|                    |              | <i>Heliconius hecale</i>      | 44       | (2)* |                |  |  | U08520       |  |         |
|                    |              | <i>Heliconius hecalesia</i>   | 46.5     | (2)* |                |  |  | AF413693     |  |         |
|                    |              | <i>Heliconius heurippa</i>    | 44       | (2)* |                |  |  | U08516       |  |         |
|                    |              | <i>Heliconius ismenius</i>    | 43.5     | (2)* |                |  |  | U08522       |  |         |
|                    |              | <i>Heliconius leucadia</i>    | 38       | (2)* |                |  |  | U08557       |  |         |
|                    |              | <i>Heliconius melpomene</i>   | 38       | (2)* |                |  |  | AF512988     |  |         |
|                    |              | <i>Heliconius numata</i>      | 40       | (2)* |                |  |  | U08538       |  |         |
|                    |              | <i>Heliconius ricini</i>      | 34.4     | (2)* |                |  |  | AF413696     |  |         |
|                    |              | <i>Heliconius sapho</i>       | 37       | (2)* |                |  |  | AF413698     |  |         |
|                    |              | <i>Heliconius sara</i>        | 33       | (2)* |                |  |  | U08545       |  |         |
|                    |              | <i>Heliconius telesiphe</i>   | 42       | (2)* |                |  |  | U08512       |  |         |
|                    |              | <i>Heliconius wallacei</i>    | 40       | (2)* |                |  |  | U08525       |  |         |
|                    |              | <i>Heliconius xanthocles</i>  | 38.5     | (2)* |                |  |  | U08541       |  |         |
|                    |              | <i>Junonia evarete</i>        | 27.5     | (2)* |                |  |  | AY03866<br>4 |  |         |
|                    |              | <i>Neruda aoede</i>           | 36.5     | (2)* |                |  |  | U08536       |  |         |
|                    |              | <i>Neruda metharme</i>        | 41.5     | (2)* |                |  |  | AF492411     |  |         |
|                    |              | <i>Podotricha telesiphe</i>   | 38       | (2)* |                |  |  | U08513       |  |         |
|                    |              | <i>Siproeta stelenes</i>      | 46.5     | (2)* |                |  |  | AY03867<br>0 |  |         |
|                    |              | <i>Speyeria idalia</i>        | 41.5     | (2)* |                |  |  | AF295040     |  |         |
|                    |              | <i>Thyridia psidii</i>        | 41.5     | (2)* |                |  |  | AF014157     |  |         |
|                    |              | <i>Tirumala hamata</i>        | 41       | (2)* |                |  |  | AY56915<br>9 |  |         |
|                    | Papilionidae | <i>Luehdorfia japonica</i>    | 31       | (2)* |                |  |  | AF170867     |  | AB01314 |

| PHYLUM/Class/Order | Family | Species Name                    | Size, mm | Ref. | Accession Nos. |  |          |  |         |
|--------------------|--------|---------------------------------|----------|------|----------------|--|----------|--|---------|
|                    |        |                                 |          |      |                |  |          |  | 2       |
|                    |        | <i>Luehdorfia puziloi</i>       | 29.5     | (2)* |                |  | AB17987  |  | AB01314 |
|                    |        |                                 |          |      |                |  | 8        |  | 3       |
|                    |        | <i>Sericinus montela</i>        | 37       | (2)* |                |  | AF170868 |  | AB01314 |
|                    |        |                                 |          |      |                |  |          |  | 4       |
|                    |        | <i>Luehdorfia longicaudata</i>  | 35       | (2)* |                |  | AB17987  |  | AB01682 |
|                    |        |                                 |          |      |                |  | 4        |  | 8       |
|                    |        | <i>Battus polydamas</i>         | 48       | (2)* |                |  |          |  | AB02757 |
|                    |        |                                 |          |      |                |  |          |  | 4       |
|                    |        | <i>Cressida cressida</i>        | 50.5     | (2)* |                |  |          |  | AB02757 |
|                    |        |                                 |          |      |                |  |          |  | 7       |
|                    |        | <i>Pharmacophagus antenor</i>   | 68.5     | (2)* |                |  |          |  | AB02758 |
|                    |        |                                 |          |      |                |  |          |  | 2       |
|                    |        | <i>Pachliopta aristolochiae</i> | 48       | (2)* |                |  |          |  | AB02759 |
|                    |        |                                 |          |      |                |  |          |  | 0       |
|                    |        | <i>Troides amphrysus</i>        | 77       | (2)* |                |  |          |  | AB02759 |
|                    |        |                                 |          |      |                |  |          |  | 3       |
|                    |        | <i>Troides helena</i>           | 81       | (2)* |                |  | AF170878 |  | AB02759 |
|                    |        |                                 |          |      |                |  |          |  | 4       |
|                    |        | <i>Graphium aristeus</i>        | 39.6     | (2)* |                |  |          |  | AB05948 |
|                    |        |                                 |          |      |                |  |          |  | 7       |
|                    |        | <i>Graphium antiphates</i>      | 55       | (2)* |                |  |          |  | AB05949 |
|                    |        |                                 |          |      |                |  |          |  | 6       |
|                    |        | <i>Graphium eurypylus</i>       | 38       | (2)* |                |  |          |  | AB05950 |
|                    |        |                                 |          |      |                |  |          |  | 4       |
|                    |        | <i>Graphium sarpedon</i>        | 45.5     | (2)* |                |  |          |  | AB05952 |
|                    |        |                                 |          |      |                |  |          |  | 6       |
|                    |        | <i>Graphium leonidas</i>        | 47.5     | (2)* |                |  |          |  | AB05954 |
|                    |        |                                 |          |      |                |  |          |  | 1       |
|                    |        | <i>Iphiclides podalirius</i>    | 39.5     | (2)* |                |  | AF170873 |  | AB05954 |
|                    |        |                                 |          |      |                |  |          |  | 6       |
|                    |        | <i>Parnassius glacialis</i>     | 37.3     | (2)* |                |  |          |  | AB06335 |
|                    |        |                                 |          |      |                |  |          |  | 3       |
|                    |        | <i>Parnassius apollo</i>        | 39.5     | (2)* |                |  | AY34625  |  | AB06335 |
|                    |        |                                 |          |      |                |  | 4        |  | 5       |
|                    |        | <i>Parnassius stubbendorfi</i>  | 32.5     | (2)* |                |  |          |  | AB06349 |
|                    |        |                                 |          |      |                |  |          |  | 4       |
|                    |        | <i>Troides hypolitus</i>        | 87.5     | (2)* |                |  |          |  | AB08442 |
|                    |        |                                 |          |      |                |  |          |  | 9       |
|                    |        | <i>Atrophaneura alcinous</i>    | 54       | (2)* |                |  | AF170876 |  | AB08691 |
|                    |        |                                 |          |      |                |  |          |  | 3       |
|                    |        | <i>Atrophaneura polyeuctes</i>  | 57       | (2)* |                |  |          |  | AB08694 |
|                    |        |                                 |          |      |                |  |          |  | 6       |
|                    |        | <i>Parnassius nordmanni</i>     | 33       | (2)* |                |  |          |  | AB09496 |
|                    |        |                                 |          |      |                |  |          |  | 8       |
|                    |        | <i>Parnassius hardwickii</i>    | 29.1     | (2)* |                |  |          |  | AB09496 |
|                    |        |                                 |          |      |                |  |          |  | 9       |
|                    |        | <i>Parnassius ariadne</i>       | 34.5     | (2)* |                |  |          |  | AB09497 |
|                    |        |                                 |          |      |                |  |          |  | 0       |

| PHYLUM/Class/Order | Family | Species Name                    | Size, mm | Ref. | Accession Nos. |  |  |              |  |              |
|--------------------|--------|---------------------------------|----------|------|----------------|--|--|--------------|--|--------------|
|                    |        | <i>Parnassius epaphus</i>       | 27       | (2)* |                |  |  |              |  | AB09561<br>0 |
|                    |        | <i>Parnassius imperator</i>     | 40.1     | (2)* |                |  |  |              |  | AB09561<br>2 |
|                    |        | <i>Parnassius acedestis</i>     | 28.5     | (2)* |                |  |  |              |  | AB09562<br>1 |
|                    |        | <i>Parnassius mnemosyne</i>     | 30.8     | (2)* |                |  |  |              |  | AB09562<br>6 |
|                    |        | <i>Parnassius delphius</i>      | 31       | (2)* |                |  |  |              |  | AB09563<br>2 |
|                    |        | <i>Parnassius autocrator</i>    | 36       | (2)* |                |  |  |              |  | AB09563<br>4 |
|                    |        | <i>Parnassius simo</i>          | 24.5     | (2)* |                |  |  |              |  | AB09564<br>0 |
|                    |        | <i>Parnassius szechenyii</i>    | 33       | (2)* |                |  |  |              |  | AB09564<br>2 |
|                    |        | <i>Parnassius apollonius</i>    | 39.5     | (2)* |                |  |  |              |  | AB09564<br>6 |
|                    |        | <i>Parnassius jaquemontii</i>   | 33.5     | (2)* |                |  |  |              |  | AB09564<br>7 |
|                    |        | <i>Parnassius tianschanicus</i> | 39.5     | (2)* |                |  |  |              |  | AB09564<br>8 |
|                    |        | <i>Parnassius maximinus</i>     | 36       | (2)* |                |  |  |              |  | AB09565<br>1 |
|                    |        | <i>Parnassius acco</i>          | 27.9     | (2)* |                |  |  |              |  | AB09565<br>2 |
|                    |        | <i>Hypermnestra helios</i>      | 26.9     | (2)* |                |  |  |              |  | AB09565<br>9 |
|                    |        | <i>Zerynthia rumina</i>         | 25.3     | (2)* |                |  |  | AF170870     |  | AB09566<br>0 |
|                    |        | <i>Archon apollinus</i>         | 28.3     | (2)* |                |  |  |              |  | AB09566<br>1 |
|                    |        | <i>Allancastria cerisyi</i>     | 28       | (2)* |                |  |  | AF170869     |  | AB09566<br>2 |
|                    |        | <i>Parnassius loxias</i>        | 33.5     | (2)* |                |  |  |              |  | AB09609<br>0 |
|                    |        | <i>Papilio alexanor</i>         | 42       | (2)* |                |  |  | AF044012     |  |              |
|                    |        | <i>Papilio anchisiades</i>      | 52.5     | (2)* |                |  |  | AF044005     |  |              |
|                    |        | <i>Papilio clytia</i>           | 52       | (2)* |                |  |  | AY45759<br>4 |  |              |
|                    |        | <i>Papilio dardanus</i>         | 46.9     | (2)* |                |  |  | AF044003     |  |              |
|                    |        | <i>Papilio demoleus</i>         | 41       | (2)* |                |  |  | AF044000     |  |              |
|                    |        | <i>Papilio indra</i>            | 38.5     | (2)* |                |  |  | AF044011     |  |              |
|                    |        | <i>Papilio machaon</i>          | 40       | (2)* |                |  |  | AF044007     |  |              |
|                    |        | <i>Papilio paris</i>            | 48.5     | (2)* |                |  |  | AY45757<br>4 |  |              |
|                    |        | <i>Papilio thoas</i>            | 48.5     | (2)* |                |  |  | AY45760<br>1 |  |              |
|                    |        | <i>Parides photinus</i>         | 47.5     | (2)* |                |  |  | AF170877     |  |              |

| PHYLUM/Class/Order | Family      | Species Name                  | Size, mm              | Ref. | Accession Nos. |          |          |          |          |
|--------------------|-------------|-------------------------------|-----------------------|------|----------------|----------|----------|----------|----------|
|                    | Pieridae    | <i>Eurema hecabe</i>          | 22.5                  | (2)* |                |          |          |          | AB013160 |
|                    |             | <i>Aporia crataegi</i>        | 32.3                  | (2)* |                |          |          |          | AB044622 |
|                    |             | <i>Anthocharis cardamines</i> | 21                    | (2)* |                |          | AB107924 |          | AB107116 |
|                    |             | <i>Colias palaeno</i>         | 25                    | (2)* |                |          | AF073942 |          |          |
|                    |             | <i>Pieris napi</i>            | 22.5                  | (2)* |                |          | AF170861 |          |          |
|                    | Riodinidae  | <i>Apodemia mormo</i>         | 15.5                  | (2)* |                |          | AF170863 |          |          |
| Arachnida          |             |                               | Female abdomen length |      |                |          |          |          |          |
| Araneae            | Dysderidae  | <i>Dysdera alegranzaensis</i> | 15.99                 | (3)  |                | AF244168 |          | AF244260 |          |
|                    |             | <i>Dysdera ambulotenta</i>    | 14.21                 | (4)  |                | AF244181 |          | AF244276 |          |
|                    |             | <i>Dysdera arabisenen</i>     | 20.16                 | (5)  |                | AF244199 |          | AF244292 |          |
|                    |             | <i>Dysdera brevisetae</i>     | 8.32                  | (4)  |                | AF244208 |          | AF244299 |          |
|                    |             | <i>Dysdera calderensis</i>    | 8.2                   | (6)  |                | AF244217 |          | AF244310 |          |
|                    |             | <i>Dysdera chioensis</i>      | 8.85                  | (4)  |                | AF244189 |          | AF244282 |          |
|                    |             | <i>Dysdera cribellata</i>     | 8.66                  | (4)  |                | AF244224 |          |          |          |
|                    |             | <i>Dysdera crocata</i>        | 11-15                 | (7)  |                | AF244152 |          | AF244237 |          |
|                    |             | <i>Dysdera enghoffi</i>       | 15.3                  | (6)  |                | AF244176 |          | AF244272 |          |
|                    |             | <i>Dysdera erythrina</i>      | 9-10                  | (7)  |                | AF244163 |          | AF244253 |          |
|                    |             | <i>Dysdera esquiveli</i>      | 4.84                  | (4)  |                | AF244206 |          | AF244298 |          |
|                    |             | <i>Dysdera gollumi</i>        | 5.31                  | (4)  |                | AF244204 |          | AF244297 |          |
|                    |             | <i>Dysdera guayota</i>        | 6.95                  | (4)  |                | AF244190 |          | AF244283 |          |
|                    |             | <i>Dysdera insulana</i>       | 25.34                 | (5)  |                | AF244226 |          | AF244315 |          |
|                    |             | <i>Dysdera labradaensis</i>   | 18.13                 | (4)  |                | AF244179 |          | AF244275 |          |
|                    |             | <i>Dysdera lancerotensis</i>  | 9.8                   | (3)  |                | AF244154 |          | AF244243 |          |
|                    |             | <i>Dysdera levipes</i>        | 6.23                  | (6)  |                | AF244203 |          | AF244296 |          |
|                    |             | <i>Dysdera longa</i>          | 17.79                 | (3)  |                | AF244165 |          | AF244255 |          |
|                    |             | <i>Dysdera paucispinosa</i>   | 4.9                   | (5)  |                | AF244216 |          | AF244307 |          |
|                    |             | <i>Dysdera ramblae</i>        | 19.1                  | (6)  |                | AF244221 |          | AF244312 |          |
|                    |             | <i>Dysdera rugichelis</i>     | 11.76                 | (6)  |                | AF244178 |          | AF244274 |          |
|                    |             | <i>Dysdera sanborondon</i>    | 9.59                  | (3)  |                | AF244166 |          | AF244256 |          |
|                    |             | <i>Dysdera spinidorsum</i>    | 10.78                 | (3)  |                | AF244174 |          | AF244270 |          |
|                    |             | <i>Dysdera unguimmanis</i>    | 9.63                  | (4)  |                | AF244192 |          | AF244285 |          |
|                    |             | <i>Dysdera verneui</i>        | 11.55                 | (5)  |                | AF244212 |          | AF244303 |          |
|                    |             | <i>Dysdera yguanirae</i>      | 8.15                  | (5)  |                | AF244197 |          | AF244290 |          |
|                    |             | <i>Harpactea hombergi</i>     | 6-7                   | (7)  |                | AF244148 |          | AF244233 |          |
|                    | Linyphiidae | <i>Erigone dentipalpus</i>    | 1.8-2.6               | (7)  |                |          |          | AY383538 |          |
|                    |             | <i>Bolyphantes alticeps</i>   | 3.5-4.5               | (7)  |                | AY078660 |          | AY078691 |          |
|                    |             | <i>Lepthyphantes minutus</i>  | 3.5-4                 | (7)  |                | AY078663 |          | AY078689 |          |
|                    |             | <i>Linyphia triangularis</i>  | 5-6.6                 | (7)  |                | AY078664 |          | AY078693 |          |
|                    |             | <i>Nerienne radiata</i>       | 3.5-6.5               | (7)  |                | AY078710 |          | AY078696 |          |

| PHYLUM/Class/Order | Family         | Species Name                      | Size, mm                             | Ref.      | Accession Nos. |                       |              |              |  |
|--------------------|----------------|-----------------------------------|--------------------------------------|-----------|----------------|-----------------------|--------------|--------------|--|
|                    | Agelenidae     | <i>Tegenaria saeva</i>            | 11-16                                | (7)       |                | AY138824,<br>AY138818 | AY13883<br>0 |              |  |
|                    | Araneidae      | <i>Araneus diadematus</i>         | 10-13                                | (7)       |                | AY03608<br>4          |              |              |  |
|                    | Tetragnathidae | <i>Nephila clavata</i>            | 21-25                                | (8)       |                |                       | AY05258<br>6 |              |  |
|                    | Nesticidae     | <i>Nesticus holsingeri</i>        | 4.5                                  | (8)       |                | AF004626              |              |              |  |
|                    |                | <i>Nesticus mimus</i>             | 3.4                                  | (8)       |                | U40515                |              |              |  |
|                    |                | <i>Nesticus reclusus</i>          | 2.7                                  | (8)       |                | AF004638              |              |              |  |
|                    |                | <i>Nesticus brimleyi</i>          | 4.5                                  | (8)       |                | AF004606              |              |              |  |
|                    |                | <i>Nesticus stupkai</i>           | 3.7                                  | (8)       |                | AF004647              |              |              |  |
|                    |                | <i>Nesticus sheari</i>            | 1.8                                  | (8)       |                | AF004641              |              |              |  |
|                    |                | <i>Nesticus carteri</i>           | 3.2                                  | (8)       |                | AF004615              |              |              |  |
|                    |                | <i>Nesticus barri</i>             | 4.7                                  | (8)       |                | AF004599              |              |              |  |
|                    |                | <i>Nesticus jonesi</i>            | 5.0                                  | (8)       |                | AF004627              |              |              |  |
|                    | Salticidae     | <i>Synemosyna formica</i>         | 4.7-5.7                              | (9)       |                | AY29667<br>0          | AY29737<br>6 |              |  |
|                    |                | <i>Neon nelli</i>                 | 2.3-3                                | (9)       |                | AF327959              | AF327988     |              |  |
|                    |                | <i>Phlegra fasciata</i>           | 7-8                                  | (9)       |                | AY29670<br>6          | AY29741<br>5 |              |  |
|                    |                | <i>Habronattus viridipes</i>      | 5.5-7                                | (9)       |                | AF477319              |              |              |  |
|                    |                | <i>Habronattus calcaratus</i>     | 5                                    | (9)       |                | AF477310              |              |              |  |
|                    |                | <i>Evarcha hoyi</i>               | 4.6-6.3                              | (9)       |                | AY29667<br>3          | AY29737<br>9 |              |  |
|                    |                | <i>Hypochilus thorelli</i>        | 14                                   | (9)       |                |                       | AY10206<br>5 |              |  |
|                    | Lycosidae      | <i>Pardosa milvina</i>            | 5.2-6.2                              | (9)       |                | AF223233              |              |              |  |
|                    |                | <i>Schizocosa crassipes</i>       | 6.7-8                                | (9)       |                | AF223243              |              |              |  |
|                    |                |                                   |                                      |           |                |                       |              |              |  |
| ANNELIDA           |                |                                   |                                      |           |                |                       |              |              |  |
| Polychaeta         |                |                                   | Body length+/-S.D. (family averages) |           |                |                       |              |              |  |
| Aciculata          | Sigalionidae   | <i>Sigalion bandaensis</i>        | 13+/-4                               | (10)<br>* |                |                       | AB10625<br>4 | AF18524<br>8 |  |
|                    | Syllidae       | <i>Proceraea cornuta</i>          | 20+/-23                              | (10)<br>* |                |                       | AF474312     |              |  |
| Canalipalpata      | Protodrilidae  | <i>Protodriloides symbioticus</i> | 7+/-5                                | (10)<br>* |                |                       | AF508125     |              |  |
|                    | Sabellidae     | <i>Sabella pavonina</i>           | 75+/-103                             | (10)<br>* |                |                       | U67144       |              |  |
|                    |                | <i>Amphiglena terebro</i>         |                                      |           |                |                       |              | AF18523<br>2 |  |
|                    | Sabellariidae  | <i>Gunnarea capensis</i>          | 25+/-0                               | (10)<br>* |                |                       | AY57789<br>2 |              |  |
|                    |                | <i>Idanthysus pennatus</i>        |                                      |           |                |                       |              | AF18523<br>1 |  |
|                    | Serpulidae     | <i>Protula sp</i>                 | 22+/-41                              | (10)<br>* |                |                       | U67142       |              |  |
|                    |                | <i>Galeolaria caespitosa</i>      |                                      |           |                |                       |              | AF18523      |  |

| PHYLUM/Class/Order | Family        | Species Name                         | Size, mm  | Ref.      | Accession Nos. |  |          |  |         |  |
|--------------------|---------------|--------------------------------------|-----------|-----------|----------------|--|----------|--|---------|--|
|                    |               |                                      |           |           |                |  |          |  | 3       |  |
|                    | Spionidae     | <i>Polydora ciliata</i>              | 40+/-22   | (10)<br>* |                |  | U50971   |  |         |  |
|                    |               | <i>Malacoceros sp.</i>               |           |           |                |  |          |  | AF18524 |  |
|                    |               |                                      |           |           |                |  |          |  | 5       |  |
|                    | Terebellidae  | <i>Lanice conchilega</i>             | 151+/-110 | (10)<br>* |                |  | X79873   |  |         |  |
|                    |               | <i>Amphitritinae sp.</i>             |           |           |                |  |          |  | AF18524 |  |
|                    |               |                                      |           |           |                |  |          |  | 0       |  |
| Capitellida        | Arenicolidae  | <i>Arenicola marina</i>              | 107+/-12  | (10)<br>* |                |  | AF508116 |  |         |  |
|                    | Maldanidae    | <i>Clymenura clypeata</i>            | 51+/-64   | (10)<br>* |                |  | AF448152 |  |         |  |
|                    |               | <i>Euclymene trinalis</i>            |           |           |                |  |          |  | AF18525 |  |
|                    |               |                                      |           |           |                |  |          |  | 6       |  |
| Eunicida           | Dorvilleidae  | <i>Dorvillea bermuderis</i>          | 13+/-14   | (10)<br>* |                |  | AY41280  |  |         |  |
|                    |               |                                      |           |           |                |  | 2        |  |         |  |
|                    | Eunicidae     | <i>Eunice pennata</i>                | 118+/-116 | (10)<br>* |                |  | AY04068  |  |         |  |
|                    |               |                                      |           |           |                |  | 4        |  |         |  |
|                    | Lumbrineridae | <i>Lumbrineris funchalensis</i>      | 109+/-87  | (10)<br>* |                |  | AF412796 |  |         |  |
|                    | Onuphidae     | <i>Aponuphis bilineata</i>           | 193+/-182 | (10)<br>* |                |  | AF412795 |  |         |  |
| Lumbricina         | Lumbricidae   | <i>Lumbricus terrestris</i>          | 219+/-11  | (11)      |                |  |          |  | AF18526 |  |
|                    |               |                                      |           |           |                |  |          |  | 2       |  |
| Phyllodocida       | Glyceridae    | <i>Glycera americana</i>             | 295+/-148 | (10)<br>* |                |  | U19519   |  |         |  |
|                    |               | <i>Glycera tridactyla</i>            |           |           |                |  |          |  | AF18524 |  |
|                    |               |                                      |           |           |                |  |          |  | 9       |  |
|                    | Hesionidae    | <i>Hesiospina sp. BC-2003</i>        | 31+/-9    | (10)<br>* |                |  | AY34043  |  |         |  |
|                    |               |                                      |           |           |                |  | 5        |  |         |  |
|                    | Nephtyidae    | <i>Nephtys hombergii</i>             | 161+/-112 | (10)<br>* |                |  | U50970   |  |         |  |
|                    |               | <i>Nephtys australiensis</i>         |           |           |                |  |          |  | AF18525 |  |
|                    |               |                                      |           |           |                |  |          |  | 0       |  |
|                    | Nereidae      | <i>Nereis limbata</i>                | 117+/-107 | (10)<br>* |                |  | U36270   |  |         |  |
|                    |               | <i>Ceratonereis longiceratophora</i> |           |           |                |  |          |  | AF18525 |  |
|                    |               |                                      |           |           |                |  |          |  | 1       |  |
|                    | Phyllodocidae | <i>Eteone longa</i>                  | 74+/-70   | (10)<br>* |                |  | AF448155 |  |         |  |
|                    |               | <i>Phyllodoce sp.</i>                |           |           |                |  |          |  | AY58371 |  |
|                    |               |                                      |           |           |                |  |          |  | 9       |  |
|                    | Polynoidae    | <i>Harmothoe impar</i>               | 64+/-29   | (10)<br>* |                |  | U50968   |  |         |  |
|                    |               | <i>Paralepidonotus ampulliferus</i>  |           |           |                |  |          |  | AF18524 |  |
|                    |               |                                      |           |           |                |  |          |  | 7       |  |
| Sabellida          | Oweniidae     | <i>Owenia fusiformis</i>             | 27+/-0    | (10)<br>* |                |  | AF448160 |  | AF18523 |  |
|                    |               |                                      |           |           |                |  |          |  | 4       |  |



| PHYLUM/Class/Order | Family          | Species Name                     | Size, mm       | Ref.      | Accession Nos. |  |              |  |                  |  |
|--------------------|-----------------|----------------------------------|----------------|-----------|----------------|--|--------------|--|------------------|--|
| Scolecida          | Opheliidae      | <i>Polyophthalmus pictus</i>     | 50+/-14        | (10)<br>* |                |  | AF448161     |  | AF18525<br>9     |  |
| Spionida           | Chaetopteridae  | <i>Chaetopterus variopedatus</i> | 217+/-104      | (10)<br>* |                |  | U67324       |  |                  |  |
|                    |                 | <i>Mesochaetopterus sp.</i>      |                |           |                |  |              |  | Unsubmitted (12) |  |
|                    | Cirratulidae    | <i>Cauleriella parva</i>         | 35+/-37        | (10)<br>* |                |  | AF448151     |  |                  |  |
|                    |                 | <i>Dodecaceria sp.</i>           |                |           |                |  |              |  | AF18523<br>7     |  |
| Terebellida        | Ampharetidae    | <i>Melinna sp. UR 2004</i>       | 30+/-26        | (10)<br>* |                |  | AY61145<br>9 |  |                  |  |
|                    |                 | <i>Amphicteis dalmatica</i>      |                |           |                |  |              |  | AF34270<br>0     |  |
|                    | Pectinariidae   | <i>Pectinaria dodeka</i>         | 28+/-3         | (10)<br>* |                |  | AB10626<br>3 |  |                  |  |
|                    |                 | <i>Pectinaria sp.</i>            |                |           |                |  |              |  | AF18523<br>9     |  |
| ECHINODERMATA      |                 |                                  |                |           |                |  |              |  |                  |  |
| Crinoidea          |                 |                                  | Feather length |           |                |  |              |  |                  |  |
| Comatulida         | Antedonidae     | <i>Antedon bifida</i>            | 50-100         | (13)      | AJ225818       |  |              |  |                  |  |
|                    |                 | <i>Florometra serratissima</i>   | 300-600        | (13)      | AF212168       |  |              |  |                  |  |
| Astroidea          |                 |                                  | Arm diameter   |           |                |  |              |  |                  |  |
| Forcipulatida      | Asteriidae      | <i>Asterias rubens</i>           | <500           | (13)      | AJ225843       |  |              |  |                  |  |
|                    |                 | <i>Marthasterias glacialis</i>   | <700           | (13)      | AJ225846       |  |              |  |                  |  |
| Paxillosida        | Astropectinidae | <i>Astropecten irregularis</i>   | <200           | (13)      | AJ225837       |  |              |  |                  |  |
|                    | Luidiidae       | <i>Luidia ciliaris</i>           | <600           | (13)      | AJ225825       |  |              |  |                  |  |
|                    |                 | <i>Porania pulvillus</i>         | <120           | (13)      |                |  | Z80955       |  |                  |  |
| Spinulosida        | Echinasteridae  | <i>Echinaster sepositus</i>      | <200           | (13)      |                |  | AF088813     |  |                  |  |
| Valvatida          | Asterinidae     | <i>Asterina gibbosa</i>          | <50            | (13)      | AJ225840       |  | AF088801     |  |                  |  |
|                    |                 | <i>Dermasterias imbricata</i>    | >200           | (13)      |                |  | AF088811     |  |                  |  |
|                    |                 | <i>Asterias amurensis</i>        | <300           | (14)      |                |  | D14358       |  |                  |  |
|                    |                 | <i>Aphelasterias japonica</i>    | <240           | (14)      |                |  | AB12560<br>0 |  |                  |  |
| Velatida           | Solasteridae    | <i>Crossaster papposus</i>       | <350           | (13)      | AJ225842       |  |              |  |                  |  |
| Ophiuroidea        |                 |                                  | Disc diameter  |           |                |  |              |  |                  |  |
| Ophiurida          | Ophiuridae      | <i>Ophiura ophiura</i>           | <35            | (13)      | AJ225835       |  |              |  |                  |  |
|                    |                 | <i>Ophiura albida</i>            | <12            | (13)      | AJ225834       |  |              |  |                  |  |
|                    | Ophiocomidae    | <i>Ophiocomina nigra</i>         | <25            | (13)      | Z80944         |  | AJ011144     |  |                  |  |
|                    |                 | <i>Ophiocoma wendtii</i>         | 5-6            | (13)      |                |  | AH00172<br>1 |  |                  |  |
|                    | Amphiuridae     | <i>Amphipholis squamata</i>      | <5             | (13)      | AJ225848       |  | X97156       |  |                  |  |
|                    |                 | <i>Acrocnida brachiata</i>       | <12            | (13)      |                |  | AJ011143     |  |                  |  |
|                    |                 | <i>Amphiura chiajei</i>          | <11            | (13)      |                |  | AJ011142     |  |                  |  |
|                    |                 | <i>Amphiura filiformis</i>       | <10            | (13)      |                |  | AJ011141     |  |                  |  |

| PHYLUM/Class/Order | Family          | Species Name                    | Size, mm      | Ref.      | Accession Nos. |          |                |  |  |
|--------------------|-----------------|---------------------------------|---------------|-----------|----------------|----------|----------------|--|--|
| Echinoidea         |                 |                                 | Body diameter |           |                |          |                |  |  |
| Arbacoidea         | Arbaciidae      | <i>Arbacia lixula</i>           | <50           | (13)      | AJ225811       |          |                |  |  |
| Echinoidea         | Echinidae       | <i>Paracentrotus lividus</i>    | <70           | (13)      |                |          | AY42881<br>6   |  |  |
|                    |                 | <i>Psammechinus miliaris</i>    | <50           | (13)      | AJ225813       |          | Z37149         |  |  |
|                    |                 | <i>Echinus esculentus</i>       | <180          | (13)      | AJ225814       |          |                |  |  |
| Spatangoida        | Brissidae       | <i>Brissopsis lyrifera</i>      | <70           | (13)      |                |          | Z37119         |  |  |
|                    | Loveniidae      | <i>Echinocardium cordatum</i>   | <90           | (13)      | AJ225812       |          | Z37123         |  |  |
|                    | Spatangidae     | <i>Spatangus purpureus</i>      | <120          | (13)      | AJ225810       |          |                |  |  |
| Temnopleuroidea    | Temnopleuroidae | <i>Sphaerechinus granularis</i> | <130          | (13)      | AJ225817       |          | Z37132         |  |  |
|                    | Toxopneustidae  | <i>Lytechinus variegatus</i>    | <85           | (13)      | AJ225816       |          | X00350, M14421 |  |  |
|                    |                 |                                 |               |           |                |          |                |  |  |
| Holothuroidea      |                 |                                 | Body length   |           |                |          |                |  |  |
| Apodida            | Synaptidae      | <i>Leptosynapta inhaerens</i>   | <300          | (13)      | AJ225841       |          | AY13346<br>8   |  |  |
| Aspidochirotida    | Holothuriidae   | <i>Holothuria edulis</i>        | 200           | (13)      |                |          | AY13347<br>1   |  |  |
|                    |                 | <i>Bohadschia vitiensis</i>     | 320           | (13)      |                |          | AY13347<br>7   |  |  |
|                    |                 | <i>Actinopyga miliaris</i>      | 250           | (13)      |                |          | AY13347<br>6   |  |  |
| Dendrochirotida    | Cucumariidae    | <i>Cucumaria elongata</i>       | <150          | (15)      |                |          | AY13347<br>9   |  |  |
|                    | Phylloporidae   | <i>Neopentadactyla mixta</i>    | <250          | (15)      |                |          | AY13348<br>2   |  |  |
|                    |                 |                                 |               |           |                |          |                |  |  |
| MOLLUSCA           |                 |                                 |               |           |                |          |                |  |  |
| Cephalopoda        |                 |                                 | Mantle length |           |                |          |                |  |  |
| Nautilida          | Nautilidae      | <i>Nautilus pompilius</i>       | 200           | (16)<br>* |                | AJ390328 | AF120628       |  |  |
|                    |                 | <i>Nautilus belauensis</i>      | 210           | (16)<br>* |                | U11625   |                |  |  |
|                    |                 | <i>Nautilus stenomphalus</i>    | 170           | (16)<br>* |                | U11601   |                |  |  |
| Octopoda           | Alloposidae     | <i>Haliphron atlanticus</i>     | 400           | (16)<br>* |                |          | AF377964       |  |  |
|                    | Bolitaenidae    | <i>Eledonella pygmaea</i>       | 200           | (16)<br>* |                |          | AF000038       |  |  |
|                    |                 | <i>Japetella diaphana</i>       | 100           | (16)<br>* |                | AJ252766 | AF000047       |  |  |
|                    | Grimpoteuthidae | <i>Grimpoteuthis sp.</i>        | 115           | (16)<br>* |                | AF487311 | AF075419       |  |  |
|                    | Octopodidae     | <i>Amphitretus pelagicus</i>    | 100           | (16)<br>* |                |          | AF377965       |  |  |
|                    |                 | <i>Bathypolypus arcticus</i>    | 100           | (16)<br>* |                |          | AF000029       |  |  |
|                    |                 | <i>Bathypolypus valdiviae</i>   | 450           | (16)<br>* |                |          | AF377969       |  |  |

| PHYLUM/Class/Order | Family           | Species Name                     | Size, mm | Ref.      | Accession Nos. |  |              |  |  |
|--------------------|------------------|----------------------------------|----------|-----------|----------------|--|--------------|--|--|
|                    |                  | <i>Cistopus indicus</i>          | 180      | (16)<br>* | AJ252744       |  |              |  |  |
|                    |                  | <i>Eledone massyae</i>           | 80       | (16)<br>* | AJ252763       |  |              |  |  |
|                    |                  | <i>Eledone moschata</i>          | 150      | (16)<br>* | AJ390326       |  |              |  |  |
|                    |                  | <i>Graneledone antarctica</i>    | 40       | (16)<br>* |                |  | AF377973     |  |  |
|                    |                  | <i>Graneledone boreopacifica</i> | 90       | (16)<br>* |                |  | AF377974     |  |  |
|                    |                  | <i>Hapalochlaena lunulata</i>    | 50       | (16)<br>* | AJ252745       |  |              |  |  |
|                    |                  | <i>Hapalochlaena maculosa</i>    | 50       | (16)<br>* |                |  | AF000043     |  |  |
|                    |                  | <i>Megaleledone senoi</i>        | 250      | (16)<br>* | AJ311118       |  | AF377977     |  |  |
|                    |                  | <i>Octopus areolatus</i>         | 50       | (16)<br>* | AJ252747       |  |              |  |  |
|                    |                  | <i>Octopus bimaculoides</i>      | 140      | (16)<br>* | AJ252748       |  | AF377967     |  |  |
|                    |                  | <i>Octopus maorum</i>            | 300      | (16)<br>* | AJ311110       |  |              |  |  |
|                    |                  | <i>Octopus mototi</i>            | 100      | (16)<br>* | AJ252752       |  |              |  |  |
|                    |                  | <i>Octopus pallidus</i>          | 150      | (16)<br>* | AJ252754       |  |              |  |  |
|                    |                  | <i>Octopus vulgaris</i>          | 250      | (16)<br>* | AJ390317       |  | AB05225<br>3 |  |  |
|                    |                  | <i>Octopus wolfi</i>             | 15       | (16)<br>* | AJ311111       |  |              |  |  |
|                    |                  | <i>Pareledone charcoti</i>       | 43       | (16)<br>* | AJ311120       |  | AF377971     |  |  |
|                    |                  | <i>Vitreledonella richardi</i>   | 110      | (16)<br>* |                |  | AF000072     |  |  |
|                    | Opisthoteuthidae | <i>Cirroctopus glacialis</i>     | 170      | (16)<br>* | AF487304       |  |              |  |  |
|                    | Stauroteuthidae  | <i>Stauroteuthis syrtensis</i>   | 90       | (16)<br>* | AJ252769       |  | AF000067     |  |  |
|                    | Tremoctopodidae  | <i>Tremoctopus violaceus</i>     | 180      | (16)<br>* | AJ252767       |  | AF377978     |  |  |
| Sepioidea          | Idiosepiidae     | <i>Idiosepius pygmaeus</i>       | 20       | (16)<br>* | AY29365<br>8   |  | AF000046     |  |  |
|                    | Sepiidae         | <i>Sepia elegans</i>             | 90       | (16)<br>* | X79591         |  |              |  |  |
|                    |                  | <i>Sepia esculenta</i>           | 180      | (16)<br>* | AF369115       |  |              |  |  |
|                    |                  | <i>Sepia opipara</i>             | 150      | (16)<br>* |                |  | AF000063     |  |  |
|                    |                  | <i>Sepia orbignyana</i>          | 120      | (16)      | X79578         |  |              |  |  |

| PHYLUM/Class/Order | Family            | Species Name                    | Size, mm | Ref.      | Accession Nos. |  |  |          |  |  |
|--------------------|-------------------|---------------------------------|----------|-----------|----------------|--|--|----------|--|--|
|                    |                   |                                 |          | *         |                |  |  |          |  |  |
|                    |                   | <i>Sepia pharaonis</i>          | 430      | (16)<br>* | X79586         |  |  |          |  |  |
|                    |                   | <i>Sepia papuensis</i>          | 80       | (16)<br>* | X79586         |  |  |          |  |  |
|                    |                   | <i>Sepia aculeata</i>           | 230      | (16)<br>* |                |  |  | AF350494 |  |  |
|                    |                   | <i>Sepia robsoni</i>            | 20       | (16)<br>* |                |  |  | AF350495 |  |  |
|                    | Sepiolidae        | <i>Euprymna berryi</i>          | 50       | (16)<br>* | AF369110       |  |  | AF350493 |  |  |
|                    |                   | <i>Euprymna morsei</i>          | 40       | (16)<br>* |                |  |  | AF035702 |  |  |
|                    |                   | <i>Euprymna scolopes</i>        | 30       | (16)<br>* | X79592         |  |  |          |  |  |
|                    |                   | <i>Euprymna stenodactyla</i>    | 190      | (16)<br>* |                |  |  | AF035704 |  |  |
|                    |                   | <i>Euprymna tasmanica</i>       | 35       | (16)<br>* |                |  |  | AF035703 |  |  |
|                    |                   | <i>Sepiola robusta</i>          | 30       | (16)<br>* |                |  |  | AF035711 |  |  |
|                    |                   | <i>Sepiola affinis</i>          | 25       | (16)<br>* |                |  |  | AF035706 |  |  |
|                    |                   | <i>Rossia palpebrosa</i>        | 45       | (16)<br>* |                |  |  | AF000061 |  |  |
|                    |                   | <i>Rossia pacifica</i>          | 80       | (16)<br>* |                |  |  | AF035705 |  |  |
|                    | Spirulidae        | <i>Spirula spirula</i>          | 200      | (16)<br>* | X79574         |  |  | AF000066 |  |  |
| Teuthida           | Ancistrocheiridae | <i>Ancistrocheirus lesueuri</i> | 390      | (16)<br>* |                |  |  | AF000026 |  |  |
|                    | Architeuthidae    | <i>Architeuthis sp.</i>         | 6000     | (16)<br>* | X79579         |  |  | AF000027 |  |  |
|                    | Brachiotheuthidae | <i>Brachiotheuthis beanii</i>   | 150      | (16)<br>* |                |  |  | AF000031 |  |  |
|                    | Chirotheuthidae   | <i>Chirotheuthis veranyi</i>    | 77       | (16)<br>* |                |  |  | AF000032 |  |  |
|                    |                   | <i>Valbytheuthis danae</i>      | 20       | (16)<br>* |                |  |  | AF075410 |  |  |
|                    | Ctenopterygidae   | <i>Ctenopteryx sicula</i>       | 40       | (16)<br>* | AF110097       |  |  | AF000033 |  |  |
|                    | Cranchiidae       | <i>Leachia pacifica</i>         | 50       | (16)<br>* | X79471         |  |  |          |  |  |
|                    |                   | <i>Helicocranchia pfefferi</i>  | 17       | (16)<br>* | AF110099       |  |  |          |  |  |
|                    | Cirroteuthidae    | <i>Cirrothauma murrayi</i>      | 220      | (16)<br>* | AF487282       |  |  | AF000034 |  |  |
|                    | Cycloteuthidae    | <i>Cycloteuthis sirventi</i>    | 40       | (16)<br>* |                |  |  | AF000036 |  |  |

| PHYLUM/Class/Order | Family           | Species Name                    | Size, mm | Ref.      | Accession Nos. |  |          |  |
|--------------------|------------------|---------------------------------|----------|-----------|----------------|--|----------|--|
|                    |                  | <i>Ommastrephes bartramii</i>   | 500      | (16)<br>* |                |  | AF000057 |  |
|                    | Enoploteuthidae  | <i>Argonauta nodosa</i>         | 100      | (16)<br>* |                |  | AF000028 |  |
|                    |                  | <i>Enoploteuthis reticulata</i> | 130      | (16)<br>* | X79572         |  | AF000039 |  |
|                    |                  | <i>Abralia sp.</i>              | 70       | (16)<br>* |                |  | AF000025 |  |
|                    |                  | <i>Abralia trigonura</i>        | 40       | (16)<br>* | X79584         |  |          |  |
|                    | Gonatidae        | <i>Gonatus berryi</i>           | 350      | (16)<br>* |                |  | AF000040 |  |
|                    |                  | <i>Gonatus onyx</i>             | 330      | (16)<br>* |                |  | AF000041 |  |
|                    |                  | <i>Gonatus californiensis</i>   | 190      | (16)<br>* |                |  | AF144724 |  |
|                    |                  | <i>Gonatus fabricii</i>         | 110      | (16)<br>* |                |  | AF131873 |  |
|                    |                  | <i>Gonatopsis borealis</i>      | 2700     | (16)<br>* |                |  | AF131872 |  |
|                    | Histioteuthidae  | <i>Histioteuthis hoylei</i>     | 130      | (16)<br>* |                |  | AF000045 |  |
|                    | Loliginidae      | <i>Loligo forbesi</i>           | 900      | (16)<br>* | AF110075       |  | AF075402 |  |
|                    |                  | <i>Loligo gahi</i>              | 280      | (16)<br>* | AJ000106       |  | AF075399 |  |
|                    |                  | <i>Loligo opalescens</i>        | 190      | (16)<br>* | AJ000107       |  | AF075395 |  |
|                    |                  | <i>Loligo pealei</i>            | 500      | (16)<br>* | AF110079       |  | AF120629 |  |
|                    |                  | <i>Loligo plei</i>              | 350      | (16)<br>* | AF110080       |  | AY039620 |  |
|                    |                  | <i>Loligo reynaudi</i>          | 400      | (16)<br>* | AF110081       |  | AF075406 |  |
|                    |                  | <i>Loligo subulata</i>          | 200      | (16)<br>* | AF110072       |  | AF075387 |  |
|                    |                  | <i>Loligo vulgaris</i>          | 640      | (16)<br>* | AF110082       |  | AF075397 |  |
|                    |                  | <i>Loliolus japonica</i>        | 120      | (16)<br>* | AF110083       |  | AF075407 |  |
|                    |                  | <i>Uroteuthis duvauceli</i>     | 290      | (16)<br>* | AF110093       |  | AF075400 |  |
|                    |                  | <i>Sepioteuthis australis</i>   | 400      | (16)<br>* |                |  | AF000065 |  |
|                    |                  | <i>Sepioteuthis lessoniana</i>  | 360      | (16)<br>* | AJ001649       |  | AF075393 |  |
|                    |                  | <i>Sepioteuthis sepioidea</i>   | 200      | (16)<br>* | AF110090       |  |          |  |
|                    | Mastigoteuthidae | <i>Mastigoteuthis magna</i>     | 70       | (16)      |                |  | AF000053 |  |

| PHYLUM/Class/Order | Family           | Species Name                      | Size, mm            | Ref.      | Accession Nos.        |          |  |              |  |  |
|--------------------|------------------|-----------------------------------|---------------------|-----------|-----------------------|----------|--|--------------|--|--|
|                    |                  |                                   |                     | *         |                       |          |  |              |  |  |
|                    | Octopoteuthidae  | <i>Octopoteuthis nielseni</i>     | 200                 | (16)<br>* |                       |          |  | AF000055     |  |  |
|                    | Ommastrephidae   | <i>Ommastrephes bartramii</i>     | 500                 | (16)<br>* |                       |          |  | AF000057     |  |  |
|                    |                  | <i>Nototodarus hawaiiensis</i>    | 16                  | (16)<br>* |                       | X79590   |  |              |  |  |
|                    |                  | <i>Sthenoteuthis oualaniensis</i> | 35                  | (16)<br>* |                       | X79582   |  | AF000069     |  |  |
|                    | Onychoteuthidae  | <i>Moroteuthis knipovitchi</i>    | 350                 | (16)<br>* |                       | AJ223488 |  |              |  |  |
|                    |                  | <i>Moroteuthis ingens</i>         | 940                 | (16)<br>* |                       | X79580   |  |              |  |  |
|                    |                  | <i>Psychroteuthis glacialis</i>   | 20                  | (16)<br>* |                       |          |  | AF131876     |  |  |
|                    | Pholidoteuthidae | <i>Pholidoteuthis adami</i>       | 160                 | (16)<br>* |                       |          |  | AF000059     |  |  |
|                    | Pyroteuthidae    | <i>Pyroteuthis addolux</i>        | 20                  | (16)<br>* |                       |          |  | AF000060     |  |  |
|                    | Thysanoteuthidae | <i>Thysanoteuthis rhombus</i>     | 40                  | (16)<br>* |                       |          |  | AF000070     |  |  |
|                    |                  |                                   |                     |           |                       |          |  |              |  |  |
| Gastropoda         |                  |                                   | Slugs = body length |           |                       |          |  |              |  |  |
| Opisthobranchia    | Aplysiidae       | <i>Aplysia punctata</i>           | <300                | (17)<br>4 | AY01415               |          |  | AF156145     |  |  |
|                    | Philinidae       | <i>Philine aperta</i>             | <70                 | (17)      |                       |          |  | AY34501<br>6 |  |  |
|                    | Acteonidae       | <i>Acteon tornatilis</i>          | <25                 | (17)      | AF357844,<br>AF339506 |          |  |              |  |  |
| Pulmonata          | Agriolimacidae   | <i>Deroceras laeve</i>            | 15-25               | (18)      |                       |          |  | AF239733     |  |  |
|                    |                  | <i>Deroceras reticulatum</i>      | 35-50               | (18)      | AY145404,<br>AY014118 |          |  | AF239734     |  |  |
|                    | Arionidae        | <i>Arion ater</i>                 | 100-150             | (18)<br>4 | AY01414               |          |  |              |  |  |
|                    |                  | <i>Arion circumscriptus</i>       | 30-40               | (18)      |                       |          |  | AY09460<br>0 |  |  |
|                    |                  | <i>Arion hortensis</i>            | 25-30               | (18)<br>3 | AY01414               |          |  |              |  |  |
|                    |                  | <i>Arion silvaticus</i>           | 30-40               | (18)<br>2 | AY14539               |          |  |              |  |  |
|                    |                  | <i>Arion subfuscus</i>            | 50-70               | (18)      |                       |          |  | AY09459<br>7 |  |  |
|                    |                  | <i>Geomalacus maculosus</i>       | 60-90               | (18)<br>5 | AY01414               |          |  |              |  |  |
|                    | Milacidae        | <i>Milax budapestensis</i>        | 50-60               | (18)<br>7 | AY01411               |          |  |              |  |  |
|                    | Onchidiidae      | <i>Onchidella celtica</i>         | <12                 | (18)      |                       |          |  | AY34504<br>8 |  |  |
|                    | Subulinidae      | <i>Rumina decollata</i>           | 22-35               | (18)      | AY01406               |          |  | AY34505      |  |  |

| PHYLUM/Class/Order | Family        | Species Name                  | Size, mm                                                               | Ref. | Accession Nos.        |  |   |         |  |
|--------------------|---------------|-------------------------------|------------------------------------------------------------------------|------|-----------------------|--|---|---------|--|
|                    |               |                               |                                                                        | 5    |                       |  | 0 |         |  |
|                    |               | <i>Subulina striatella</i>    | 16-24                                                                  | (18) | AY01406               |  |   |         |  |
|                    |               |                               |                                                                        | 1    |                       |  |   |         |  |
|                    |               |                               | Snails = shell length x width, Limpets = shell length x width x height |      |                       |  |   |         |  |
|                    | Carychiidae   | <i>Carychium tridentatum</i>  | 1.8-2x0.8-0.9                                                          | (18) | AY01414               |  |   |         |  |
|                    |               |                               |                                                                        | 8    |                       |  |   |         |  |
|                    | Clausiliidae  | <i>Clausilia bidentata</i>    | 9-12x2.3-2.7                                                           | (18) | AY01405               |  |   |         |  |
|                    |               |                               |                                                                        | 1    |                       |  |   |         |  |
|                    |               | <i>Cochlodina laminata</i>    | 15-17x4                                                                | (18) | AY01404               |  |   |         |  |
|                    |               |                               |                                                                        | 7    |                       |  |   |         |  |
|                    |               | <i>Macrogastra rolphii</i>    | 11-14x3.4-3.6                                                          | (18) | AY01405               |  |   |         |  |
|                    |               |                               |                                                                        | 2    |                       |  |   |         |  |
|                    | Cochlicopidae | <i>Azeca goodalli</i>         | 5.3-6.8x2.4-2.7                                                        | (18) | AY54647               |  |   |         |  |
|                    |               |                               |                                                                        | 0    |                       |  |   |         |  |
|                    |               | <i>Cochlicopa lubrica</i>     | 5-7.5x2.4-2.9                                                          | (18) | AY01401               |  |   |         |  |
|                    |               |                               |                                                                        | 9    |                       |  |   |         |  |
|                    | Endodontidae  | <i>Discus rotundatus</i>      | 2.5-3x5.5-7                                                            | (18) | AY01409               |  |   |         |  |
|                    |               |                               |                                                                        | 7    |                       |  |   |         |  |
|                    | Helicidae     | <i>Arianta arbustorum</i>     | 10-22x20-27                                                            | (18) |                       |  |   | AY54626 |  |
|                    |               |                               |                                                                        |      |                       |  |   | 3       |  |
|                    |               | <i>Cepaea nemoralis</i>       | 12-22x18-25                                                            | (18) | AY01413               |  |   | AY54627 |  |
|                    |               |                               |                                                                        | 0    |                       |  |   | 0       |  |
|                    |               | <i>Chilostoma cingulatum</i>  | 10-12x20-27                                                            | (18) | AJ550980              |  |   |         |  |
|                    |               | <i>Chilostoma glaciale</i>    | 6-8x12-16                                                              | (18) | AJ550979              |  |   |         |  |
|                    |               | <i>Helicella itala</i>        | 5-12x9-25                                                              | (18) |                       |  |   | AY54627 |  |
|                    |               |                               |                                                                        |      |                       |  |   | 8       |  |
|                    |               | <i>Helix aspersa</i>          | 25-40x25-45                                                            | (18) |                       |  |   | AY54628 |  |
|                    |               |                               |                                                                        |      |                       |  |   | 3       |  |
|                    |               | <i>Helix pomatia</i>          | 30-50x32-50                                                            | (18) | AJ550974              |  |   |         |  |
|                    | Hygromiidae   | <i>Theba pisana</i>           | 9-20x12-25                                                             | (18) | AY01413               |  |   |         |  |
|                    |               |                               |                                                                        | 5    |                       |  |   |         |  |
|                    |               | <i>Hygromia cinctella</i>     | 6-7x10-12                                                              | (18) | AJ550968              |  |   |         |  |
|                    |               | <i>Monacha cartusiana</i>     | 6-10x9-17                                                              | (18) | AJ550962              |  |   |         |  |
|                    |               | <i>Perforatella bidentata</i> | 5-7x9-25                                                               | (18) | AJ550966              |  |   |         |  |
|                    |               | <i>Perforatella incarnata</i> | 9-11x13-16                                                             | (18) | AJ550965              |  |   | AY54629 |  |
|                    |               |                               |                                                                        |      |                       |  |   | 1       |  |
|                    |               | <i>Trichia hispidae</i>       | 5-6x5-12                                                               | (18) | AY01412               |  |   |         |  |
|                    |               |                               |                                                                        | 5    |                       |  |   |         |  |
|                    |               | <i>Trichia striolata</i>      | 8-9x13                                                                 | (19) | AJ550964              |  |   |         |  |
|                    |               | <i>Trochoidea geyeri</i>      | 3.5-5x5-8                                                              | (18) |                       |  |   | AY54629 |  |
|                    |               |                               |                                                                        |      |                       |  |   | 6       |  |
|                    | Melampidae    | <i>Phytia myosotis</i>        | 6-8x3x3.5                                                              | (19) | AF357861,<br>AF339504 |  |   |         |  |
|                    | Physidae      | <i>Physa fontinalis</i>       | 12x6x7.5                                                               | (19) | AF327540              |  |   |         |  |
|                    | Punctidae     | <i>Lauria cylindracea</i>     | 3-4.4x1.8                                                              | (18) | AY01402               |  |   |         |  |
|                    |               |                               |                                                                        | 3    |                       |  |   |         |  |
|                    | Valloniidae   | <i>Vallonia costata</i>       | 1.2-1.3x2.2-2.7                                                        | (18) | AY01402               |  |   |         |  |
|                    |               |                               |                                                                        | 5    |                       |  |   |         |  |
|                    |               | <i>Vallonia eccentrica</i>    | 1-1.1x2-2.2                                                            | (18) | AY01402               |  |   |         |  |

| PHYLUM/Class/Order | Family         | Species Name                  | Size, mm                               | Ref. | Accession Nos.                  |  |  |              |  |  |
|--------------------|----------------|-------------------------------|----------------------------------------|------|---------------------------------|--|--|--------------|--|--|
|                    |                |                               |                                        |      | 6                               |  |  |              |  |  |
|                    | Vitrinidae     | <i>Vitrina pellucida</i>      | 3x4.5-6                                | (18) | AY01411<br>1                    |  |  |              |  |  |
|                    | Zonitidae      | <i>Oxychilus cellarius</i>    | 5x9-12                                 | (18) | AY01411<br>6                    |  |  |              |  |  |
|                    |                | <i>Oxychilus alliaris</i>     | 2.5-3.5x5.5-7                          | (18) | AY01411<br>4                    |  |  |              |  |  |
|                    |                | <i>Vitrea crystallina</i>     | 1.5-1.7x2.8-4                          | (18) | AY01411<br>3                    |  |  |              |  |  |
| Sorbeoconcha       | Buccinidae     | <i>Buccinum undatum</i>       | <110x<68                               | (17) | AF327548                        |  |  |              |  |  |
|                    |                | <i>Neptunea antiqua</i>       | <200x<50                               | (17) |                                 |  |  | AF373886     |  |  |
|                    | Bithyniidae    | <i>Bithynia tentaculata</i>   | 9.5-17x6-8.5                           | (19) |                                 |  |  | AF367643     |  |  |
|                    | Calyptraeidae  | <i>Calyptraea chinensis</i>   | <15x<5                                 | (17) |                                 |  |  | AF546064     |  |  |
|                    | Capulidae      | <i>Capulus ungaricus</i>      | 40x25x15                               | (17) |                                 |  |  | AF546070     |  |  |
|                    | Hydrobiidae    | <i>Hydrobia acuta</i>         | <4x<1.5                                | (17) |                                 |  |  | AF278820     |  |  |
|                    |                | <i>Hydrobia ulvae</i>         | <6x<3                                  | (17) |                                 |  |  | AF118323     |  |  |
|                    | Lacunidae      | <i>Lacuna pallidula</i>       | 6-12x3-6                               | (17) | AJ488645                        |  |  |              |  |  |
|                    | Littorinidae   | <i>Littorina littorea</i>     | <32x<35                                | (17) | AF550444, AF357851,<br>AF327550 |  |  | AJ622946     |  |  |
|                    |                | <i>Littorina obtusata</i>     | <15x<17                                | (17) | AJ488674                        |  |  | AJ622947     |  |  |
|                    |                | <i>Melarhapha neritoides</i>  | 7.5x6                                  | (19) |                                 |  |  | AJ133343     |  |  |
|                    | Lymnaeidae     | <i>Lymnaea stagnalis</i>      | <50x<25                                | (20) | AF357857,<br>AF327539           |  |  |              |  |  |
|                    | Muricidae      | <i>Ocenebra erinacea</i>      | <50x<25                                | (17) | AF327546                        |  |  |              |  |  |
|                    |                | <i>Nucella lapillus</i>       | <42x<22                                | (17) |                                 |  |  | AF242171     |  |  |
| Archaeogastropoda  | Fissurellidae  | <i>Diodora graeca</i>         | 25x16x10                               | (17) |                                 |  |  | AF120632     |  |  |
|                    | Trochidae      | <i>Calliostoma zizyphinum</i> | <30x<30                                | (17) | AF339510                        |  |  |              |  |  |
|                    |                | <i>Gibbula cineraria</i>      | <16x<15                                | (17) | AY34039<br>5                    |  |  |              |  |  |
| Architaenioglossa  | Viviparidae    | <i>Viviparus viviparus</i>    | 33-40x22-28                            | (19) | U75863                          |  |  |              |  |  |
| Neritoida          | Neritidae      | <i>Theodoxus fluviatilis</i>  | 6x11                                   | (19) |                                 |  |  | AF120633     |  |  |
|                    |                |                               |                                        |      |                                 |  |  |              |  |  |
| Bivalvia           |                |                               | Shell length x width (family averages) |      |                                 |  |  |              |  |  |
| Anomioidea         | Anomidae       | <i>Anomia ehippium</i>        | 71.9x50.3                              | (21) |                                 |  |  | AF120535     |  |  |
| Arcoidea           | Arcidae        | <i>Arca imbricata</i>         | 60.1x36                                | (21) | AB10161<br>2                    |  |  |              |  |  |
|                    |                | <i>Barbatia barbata</i>       |                                        |      |                                 |  |  | AF207646     |  |  |
|                    |                | <i>Arca ventricosa</i>        |                                        |      |                                 |  |  | AF253494     |  |  |
|                    | Glycymerididae | <i>Glycymeris pedunculata</i> | 49.6x42.3                              | (21) |                                 |  |  | AJ389631     |  |  |
|                    | Noetiidae      | <i>Striarca lactea</i>        | 43.2x29.2                              | (21) | AF120590                        |  |  | AF120531     |  |  |
|                    |                | <i>Arcopsis adamsi</i>        |                                        |      |                                 |  |  | AF253482     |  |  |
| Cardioidea         | Cardiidae      | <i>Keenaea samarangae</i>     | 68.5x51.7                              | (21) |                                 |  |  | AB07694<br>7 |  |  |
|                    |                | <i>Cardium edule</i>          |                                        |      |                                 |  |  | AY57055<br>5 |  |  |
| Chamoidea          | Chamidae       | <i>Chama gryphoides</i>       | 59.1x45.9                              | (21) | AF120545                        |  |  | AF120606     |  |  |
| Corbiculoidea      | Corbiculidae   | <i>Corbicula leana</i>        | 47.2x40.2                              | (21) | AY05255<br>7                    |  |  | AF120666     |  |  |



| PHYLUM/Class/Order | Family          | Species Name                     | Size, mm    | Ref. | Accession Nos. |  |              |              |  |  |
|--------------------|-----------------|----------------------------------|-------------|------|----------------|--|--------------|--------------|--|--|
|                    |                 | <i>Corbicula fluminea</i>        |             |      |                |  | AF120557     |              |  |  |
| Galeommatoidae     | Galeommatidae   | <i>Galeomma turtoni</i>          | 10x7.4      | (21) | AF120608       |  |              |              |  |  |
|                    | Lasaeidae       | <i>Lasaea sp. 'Florida'</i>      | 3x3         | (21) | AF120609       |  |              |              |  |  |
| Gastrochaenoidea   | Gastrochaenidae | <i>Gastrochaena dubia</i>        | 28x11.5     | (21) | AF120623       |  | AY19268<br>6 |              |  |  |
| Limoidea           | Limidae         | <i>Lima lima</i>                 | 26.4x20.3   | (21) | AF120594       |  | AF120533     |              |  |  |
| Limopsoidea        | Limopsidae      | <i>Empleconia cumingii</i>       | 26.7x19.3   | (21) | AB10161<br>0   |  |              |              |  |  |
|                    |                 | <i>Limopsis marionensis</i>      |             |      |                |  | AJ422058     |              |  |  |
|                    |                 | <i>Empleconia cumingii</i>       |             |      |                |  |              | AB07693<br>0 |  |  |
|                    | Philobryidae    | <i>Cosa waikikia</i>             | 13x4        | (21) | AB10161<br>4   |  |              | AB08410<br>7 |  |  |
| Lucinoidea         | Lucinidae       | <i>Anodontia omissa</i>          | 31.5x26.5   | (21) | AJ581878       |  |              |              |  |  |
| Lucinoidea         |                 | <i>Codakia orbiculata</i>        |             |      |                |  |              | AF120657     |  |  |
| Mactroidea         | Matricidae      | <i>Rangia cuneata</i>            | 88.4x61.1   | (21) | AF131002       |  |              |              |  |  |
|                    |                 | <i>Tresus nuttali</i>            |             |      |                |  | L11269       |              |  |  |
|                    |                 | <i>Mactra veneriformis</i>       |             |      |                |  |              | AB04084<br>6 |  |  |
| Myoidea            | Corbulidae      | <i>Varicorbula dissimilis</i>    | 17.3x11.1   | (21) | AF120622       |  |              | AF120669     |  |  |
|                    |                 | <i>Notocorbula coxi</i>          |             |      |                |  | AY19268<br>4 |              |  |  |
|                    | Myidae          | <i>Mya arenaria</i>              | 95x43       | (21) | AF120621       |  |              | AF120668     |  |  |
|                    |                 | <i>Mya truncata</i>              |             |      |                |  | AY57055<br>6 |              |  |  |
| Nuculanoidea       | Sareptidae      | <i>Yoldia limatula</i>           | 35.6x16     | (21) | AY14542<br>4   |  | AF120528     |              |  |  |
| Nuculoidea         | Nuculidae       | <i>Acila castrensis</i>          | 9.6x5.7     | (21) | AF120584       |  |              |              |  |  |
|                    |                 | <i>Nucula sulcata</i>            |             |      |                |  | AF120525     |              |  |  |
| Ostreoidea         | Ostreoidae      | <i>Lopha cristagalli</i>         | 119.8x101.7 | (21) |                |  | AJ389635     |              |  |  |
|                    |                 | <i>Crassostrea ariakensis</i>    |             |      |                |  |              | AF300617     |  |  |
| Pandoroidea        | Lyonsiidae      | <i>Lyonsiella abyssicola</i>     | 62.4x30     | (21) |                |  | AY19269<br>9 |              |  |  |
|                    |                 | <i>Lyonsia floridana</i>         |             |      |                |  |              | AF120654     |  |  |
| Pectinoidea        | Pectinidae      | <i>Argopecten irradians</i>      | 63.5x50.9   | (21) | AY14539<br>1   |  |              |              |  |  |
|                    |                 | <i>Pecten jacobaeus</i>          |             |      |                |  | AY07011<br>2 |              |  |  |
|                    |                 | <i>Cyclopecten ryukyuensis</i>   |             |      |                |  |              | AB07695<br>2 |  |  |
|                    | Spondylidae     | <i>Spondylus varius</i>          | 161.3x129   | (21) | AB10274<br>9   |  |              | AB07690<br>9 |  |  |
|                    |                 | <i>Spondylus crassisquamatus</i> |             |      |                |  | AJ389646     |              |  |  |
| Pholadoidea        | Teredinidae     | <i>Bankia carinata</i>           | 9x7.8       | (21) | AF120625       |  |              |              |  |  |
|                    |                 | <i>Nausitora fusticula</i>       |             |      |                |  | AY19269<br>7 |              |  |  |
| Pinnoidea          | Pinnidae        | <i>Streptopinna saccata</i>      | 240.4x111   | (21) | AB10275<br>3   |  |              |              |  |  |

| PHYLUM/Class/Order | Family             | Species Name                     | Size, mm    | Ref. | Accession Nos. |  |          |          |  |  |
|--------------------|--------------------|----------------------------------|-------------|------|----------------|--|----------|----------|--|--|
|                    |                    | <i>Pinna muricata</i>            |             |      |                |  | AJ389636 | AB076929 |  |  |
| Poromyoidea        | Cuspidariidae      | <i>Cuspidaria tenella</i>        | 17.1x8.2    | (21) |                |  | AY192708 |          |  |  |
|                    |                    | <i>Cuspidaria cuspidata</i>      |             |      |                |  |          | AF120655 |  |  |
| Pterioidea         | Isognomonidae      | <i>Isognomon acutirostris</i>    | 44.5x75     | (21) | AB102762       |  |          | AB076926 |  |  |
|                    |                    | <i>Isognomon isognomum</i>       |             |      |                |  | AF229621 |          |  |  |
|                    | Pteriidae          | <i>Pteria hirundo</i>            | 166x119     | (21) | AF120592       |  | AF120532 |          |  |  |
|                    |                    | <i>Pinctada maculata</i>         |             |      |                |  |          | AB076928 |  |  |
| Tellinoidea        | Donacidae          | <i>Capsella variegata</i>        | 41.6x21.3   | (21) | AY070126       |  |          |          |  |  |
|                    |                    | <i>Donax trunculus</i>           |             |      |                |  | AJ309018 |          |  |  |
|                    |                    | <i>Donax faba</i>                |             |      |                |  |          | AB040845 |  |  |
|                    | Tellinidae         | <i>Macoma balthica</i>           | 43.5x25.6   | (21) | AF131004       |  | AY570554 | AY162263 |  |  |
| PLATYHELMINTHES    |                    |                                  |             |      |                |  |          |          |  |  |
| Digenea            |                    |                                  | Body length |      |                |  |          |          |  |  |
| Echinostomida      | Fasciolidae        | <i>Fasciola hepatica</i>         | 25          | (22) |                |  | AJ004969 | AF216697 |  |  |
|                    | Echinostomatidae   | <i>Echinostoma caproni</i>       | 5.65        | (22) |                |  | L06567   | AF025829 |  |  |
|                    |                    | <i>Echinostoma revolutum</i>     | 18.23       | (22) |                |  | AF025824 | AF025824 |  |  |
|                    |                    | <i>Echinostoma trivolvis</i>     | 12.5        | (22) |                |  |          | AF025823 |  |  |
| Strigeidida        | Clinostomidae      | <i>Clinostomum complanatum</i>   | 5.5         | (22) |                |  | AY245701 | AY157193 |  |  |
|                    | Schistosomatidae   | <i>Schistosomatium douthitti</i> | 7.35        | (22) |                |  | AY157221 | U82264   |  |  |
|                    |                    | <i>Schistosoma japonicum</i>     | 20          | (22) |                |  | U89871   | U22162   |  |  |
|                    |                    | <i>Schistosoma mansoni</i>       | 10          | (22) |                |  | U65657   | U22159   |  |  |
|                    |                    | <i>Schistosoma haematobium</i>   | 20          | (22) |                |  | Z11976   |          |  |  |
|                    |                    | <i>Schistosoma intercalatum</i>  | 20.5        | (22) |                |  | AY157235 | U22160   |  |  |
|                    | Strigeidae         | <i>Apatemon gracilis</i>         | 0.73        | (22) |                |  |          | AJ301894 |  |  |
| Opisthorchiida     | Opisthorchiidae    | <i>Clonorchis sinensis</i>       | 15          | (22) |                |  | AF217100 | AF096229 |  |  |
| Cestoda            |                    |                                  |             |      |                |  |          |          |  |  |
| Pseudophyllidea    | Ancistrocephalidae | <i>Triaenophorus nodulosus</i>   | 240         | (22) |                |  | Y09677   |          |  |  |
|                    | Diphyllobothriidae | <i>Diphyllobothrium latum</i>    | 25000       | (22) |                |  | Z98417   | AF096240 |  |  |
|                    |                    | <i>Schistocephalus solidus</i>   | 165         | (22) |                |  | AF254121 | AF247839 |  |  |
|                    | Ligulidae          | <i>Ligula intestinalis</i>       | 550         | (22) |                |  |          | AF153910 |  |  |
| Cyclophyllidea     | Taeniidae          | <i>Taenia crassiceps</i>         | 140         | (22) |                |  | U88075   | AB033411 |  |  |
|                    |                    | <i>Taenia hydatigena</i>         | 5000        | (22) |                |  |          | AB033410 |  |  |
|                    |                    | <i>Taenia saginata</i>           | 10500       | (22) |                |  |          | AB066495 |  |  |

| PHYLUM/Class/Order | Family              | Species Name                        | Size, mm          | Ref. | Accession Nos. |  |          |          |  |  |
|--------------------|---------------------|-------------------------------------|-------------------|------|----------------|--|----------|----------|--|--|
|                    |                     | <i>Taenia solium</i>                | 4500              | (22) |                |  | U88076   | AY211880 |  |  |
|                    |                     | <i>Echinococcus granulosus</i>      | 5                 | (22) |                |  | U27015   | AB033407 |  |  |
|                    | Hymenolepididae     | <i>Hymenolepis microstoma</i>       | 80                | (22) |                |  | AJ287525 |          |  |  |
|                    |                     | <i>Hymenolepis diminuta</i>         | 950               | (22) |                |  | AF124475 | AF096244 |  |  |
|                    |                     | <i>Hymenolepis nana</i>             | 30                | (22) |                |  | AF461124 | AB033412 |  |  |
|                    |                     |                                     |                   |      |                |  |          |          |  |  |
| Turbellaria        |                     |                                     |                   |      |                |  |          |          |  |  |
| Tricladida         | Planariidae         | <i>Polycelis nigra</i>              | 9.75              | (22) |                |  | AF013151 | AF178321 |  |  |
|                    |                     | <i>Polycelis tenuis</i>             | 10                | (22) |                |  | Z99949   | AF178312 |  |  |
|                    | Dendrocoelidae      | <i>Dendrocoelum lacteum</i>         | 19.5              | (22) |                |  | AJ312271 |          |  |  |
|                    |                     |                                     |                   |      |                |  |          |          |  |  |
| Monogenea          |                     |                                     | (family averages) |      |                |  |          |          |  |  |
| Monopisthocotylea  | Bothrirematidae     | <i>Bravohollisia sp</i>             | 1.95              | (23) | AF387509       |  |          |          |  |  |
|                    | Capsalidae          | <i>Benedenia sp</i>                 | 7.2               | (23) |                |  | AJ228774 |          |  |  |
|                    |                     | <i>Entobdella hippoglossi</i>       |                   |      | AF382055       |  |          |          |  |  |
|                    | Dactylogyridae      | <i>Haliotrema scyphovagina</i>      | 0.94              | (23) |                |  | AY820611 |          |  |  |
|                    | Diplectanidae       | <i>Lamellodiscus erythrini</i>      | 0.72              | (23) |                |  | AJ276440 |          |  |  |
|                    |                     | <i>Acleotrema sp</i>                |                   | (23) | AF026118       |  |          |          |  |  |
|                    | Gyrodactylidae      | <i>Gyrodactyloides bychowskii</i>   | 0.79              | (23) |                |  | AJ566379 |          |  |  |
|                    |                     | <i>Gyrodactylus salaris</i>         |                   | (23) | AJ542394       |  |          |          |  |  |
|                    | Hexabothriidae      | <i>Pseudohexabothrium taeniurae</i> | 6.49              | (23) | AF382035       |  | AJ228791 |          |  |  |
|                    | Monocotylidae       | <i>Dictyocotyle coeliaca</i>        | 3.88              | (23) |                |  | AJ228778 |          |  |  |
|                    | Tetraonchidae       | <i>Tetraonchus monenteron</i>       | 0.75              | (23) |                |  | AJ490159 |          |  |  |
| Polyopisthocotylea | Allodiscocotylidae  | <i>Metacamopia oligoplites</i>      | 2.05              | (23) | AF382038       |  |          |          |  |  |
|                    | Axinidae            | <i>Zeuxapta seriola</i>             | 4.27              | (23) | AF026103       |  |          |          |  |  |
|                    | Diclidophoridae     | <i>Heterobothrium okamotoi</i>      | 5.71              | (23) |                |  | AB162155 |          |  |  |
|                    |                     | <i>Diclidophora denticulata</i>     |                   |      | AY157169       |  |          |          |  |  |
|                    | Discocotylidae      | <i>Discocotyle sagittata</i>        | 4.53              | (23) | AF382036       |  |          |          |  |  |
|                    | Gotocotylidae       | <i>Gotocotyla bivagina</i>          | 6.24              | (23) |                |  | AJ276424 |          |  |  |
|                    | Heteraxinidae       | <i>Cemocotyle trachuri</i>          | 5.02              | (23) | AF131726       |  |          |          |  |  |
|                    | Hexostomatidae      | <i>Hexostoma thynni</i>             | 10.59             | (23) | AF131721       |  |          |          |  |  |
|                    | Mazocraeidae        | <i>Probursata brasiliensis</i>      | 4.1               | (23) |                |  | AJ276426 |          |  |  |
|                    | Neothoracocotylidae | <i>Paradewesia sp.</i>              | 12                | (23) | AF382042       |  | AJ287555 |          |  |  |
|                    | Plectanocotylidae   | <i>Plectanocotyle gurnardi</i>      | 3.5               | (23) | AF382045       |  | AJ228790 |          |  |  |
|                    | Polystomatidae      | <i>Polystomoides malayi</i>         | 3.9               | (23) |                |  | AJ228792 |          |  |  |
|                    |                     | <i>Polystomoides bourgati</i>       |                   |      | AF382068       |  |          |          |  |  |
|                    | Sphyranuridae       | <i>Sphyranura oligorchis</i>        | 2.6               | (23) |                |  | AJ287994 |          |  |  |

1. Mayhew, P. J. (1998) *Proc. R. Soc. London B* **265**, 383-389.
2. Garcia-Barros, E. (2000) *J. Res. Lepidop.* **35**, 90-136.
3. Amedo, M. A., Oromi, P. & Ribera, C. (2000) *J. Arachnol.* **28**, 261-292.
4. Amedo, M. A. & Ribera, C. (1999) *J. Arachnol.* **27**, 604-662.
5. Amedo, M. A. & Ribera, C. (1997) *Zool. Scripta* **26**, 205-243.
6. Amedo, M. A., Oromi, P. & Ribera, C. (1996) *Zool. Scripta* **25**, 241-247.
7. Roberts, M. J. (1985) *The spiders of Great Britain and Ireland* (Harley Books, Colchester).
8. Hormiga, G., Scharff, N. & Coddington, J. A. (2000) *Syst Biol* **49**, 435-62.
9. Kaston, B. J. (1948) *Spiders of Connecticut*, (State Geological and Natural History Survey, Hartford USA.).
10. McHugh, D. & Fong, P. P. (2002) *Invertebr. Biol.* **121**, 325-338.
11. Mercer, R. D., Gabriel, A. G. A., Barendse, J., Marshal, D. J. & Chown, S. L. (2001) *Antarctic Science* **13**, 135-143.
12. Brown, S., G. Rouse, Hutchings, P. Colgan, D. (1999) *Australian J. Zool.* **47**, 499-516.
13. Hayward, P., Nelson-Smith, T. & Sheilds, C. (1996) *Seashores of Britain and Europe* (HarperCollins Publishers, London).
14. Institute of Marine Biology, Far East Branch, Russian Academy of Sciences (2006) <http://www.fegi.ru/prim/sea/star.htm>.
15. World Biodiversity Database, The Netherlands Biodiversity Information Facility (2006) <http://ip30.eti.uva.nl/bis/>.
16. Wood, J. B. & Day, C. L. (2006) *CephBase*, <http://www.cephbase.utmb.edu/>.
17. Hayward, P. J., D., W. G. & Yonow, N. (1990) *The Marine Fauna of the British isles and North–West Europe* (Clarendon Press, Oxford).
18. Kerney, M. P. & Cameron, R. A. D. (1979) *A Field Guide to the Land Snails of Britain and North–West Europe*. (Collins, London).
19. Ellis, A. E. & Ellis, R. E. (1969) *British Snails: A guide to the Nonmarine Gastropoda of Great Britain and Ireland, Pleisocene to Recent*. (Oxford University Press, Oxford).
20. Fitter, R. & Manuel, R. (1986) *Collins Field Guide to Freshwater Life, of Britain and North–West Europe*. (Collins, London).
21. Roy, K., Jablonski, D. & Valentine, J. W. (2001) *Ecol. Lett.* **4**, 366-370.
22. Trouve, S., Sasal, P., Jourdane, J., Renaud, F. & Morand, S. (1998) *Oecologia* **115**, 370-378.
23. Poulin, R. (2002) *Int. J. Parasit.* **32**, 245-254.
