# Supplementary material
Source: PubMed Central journal article supplement (PMC1464347)
Supplement: pnas_0510251103_8.pdf [file pnas_0510251103_8.pdf]

**Appendix 7.** Amount of unalignable sequence data in bp and the percentage deleted for each gene.

| Data set                  | Gene | Sequence length, bp | Total deleted sequence, bp | Percentage (%) sequence deleted |
|---------------------------|------|---------------------|----------------------------|---------------------------------|
| Species-level comparisons |      |                     |                            |                                 |
| Lepidoptera               | COI  | 1545                | 75                         | 4.9                             |
|                           | COII | 790                 | 50                         | 6.3                             |
|                           | ND5  | 895                 | 112                        | 12.5                            |
| Arachnida                 | 16S  | 1035                | 150                        | 14.5                            |
|                           | COI  | 485                 | 14                         | 2.9                             |
| Cephalopoda               | COI  | 657                 | 0                          | 0.0                             |
|                           | 16S  | 580                 | 123                        | 21.2                            |
| Gastropoda                | 28S  | 1680                | 124                        | 7.4                             |
|                           | COI  | 1220                | 11                         | 0.9                             |
| Echinodermata             | 18S  | 1880                | 159                        | 8.5                             |
|                           | 28S  | 390                 | 58                         | 14.9                            |
| Platyhelminthes           | 18S  | 2620                | 911                        | 34.8                            |
|                           | COI  | 960                 | 150                        | 15.6                            |
| Family-level comparisons  |      |                     |                            |                                 |
| Hymenoptera               | 28S  | 591                 | 142                        | 24.0                            |
|                           | COI  | 421                 | 0                          | 0.0                             |
| Bivalvia                  | 18S  | 1819                | 106                        | 5.1                             |
|                           | 28S  | 3509                | 180                        | 5.1                             |
|                           | COI  | 1074                | 63                         | 5.9                             |
| Annelida                  | 18S  | 1624                | 241                        | 12.9                            |
|                           | H3   | 1270                | 55                         | 4.2                             |

|           |     |      |     |      |
|-----------|-----|------|-----|------|
| Monogenea | 18S | 1898 | 242 | 11.3 |
|           | 28S | 930  | 405 | 30.3 |
